# Supplementary material
Source: MDPI journal article supplement (https://www.mdpi.com/2073-4344/12/10/1080)

## Supporting Information

# **Pd-Catalyzed Hirao P–C Coupling Reactions with Dihalogenobenzenes without the Usual P-Ligands under MW Conditions**

**Bianka Huszár<sup>1</sup>, Petra Regina Varga<sup>1</sup>, Nóra, Á. Szűcs<sup>1</sup>, András Simon<sup>2</sup>, László Drahos<sup>3</sup> and  
György Keglevich<sup>1\*</sup>**

<sup>1</sup>Department of Organic Chemistry and Technology, Budapest University of Technology and Economics

<sup>2</sup>Department of Inorganic and Analytical Chemistry, Budapest University of Technology and Economics

<sup>3</sup>MS Proteomics Research Group, Research Centre for Natural Sciences, Hungary

### **Table of contents**

- |                                         |           |
|-----------------------------------------|-----------|
| 1. NMR spectra for compounds <b>1–9</b> | pg. 1–37. |
|-----------------------------------------|-----------|

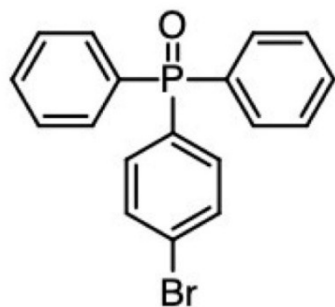

(4-Bromophenyl)diphenylphosphine oxide (**1a**)

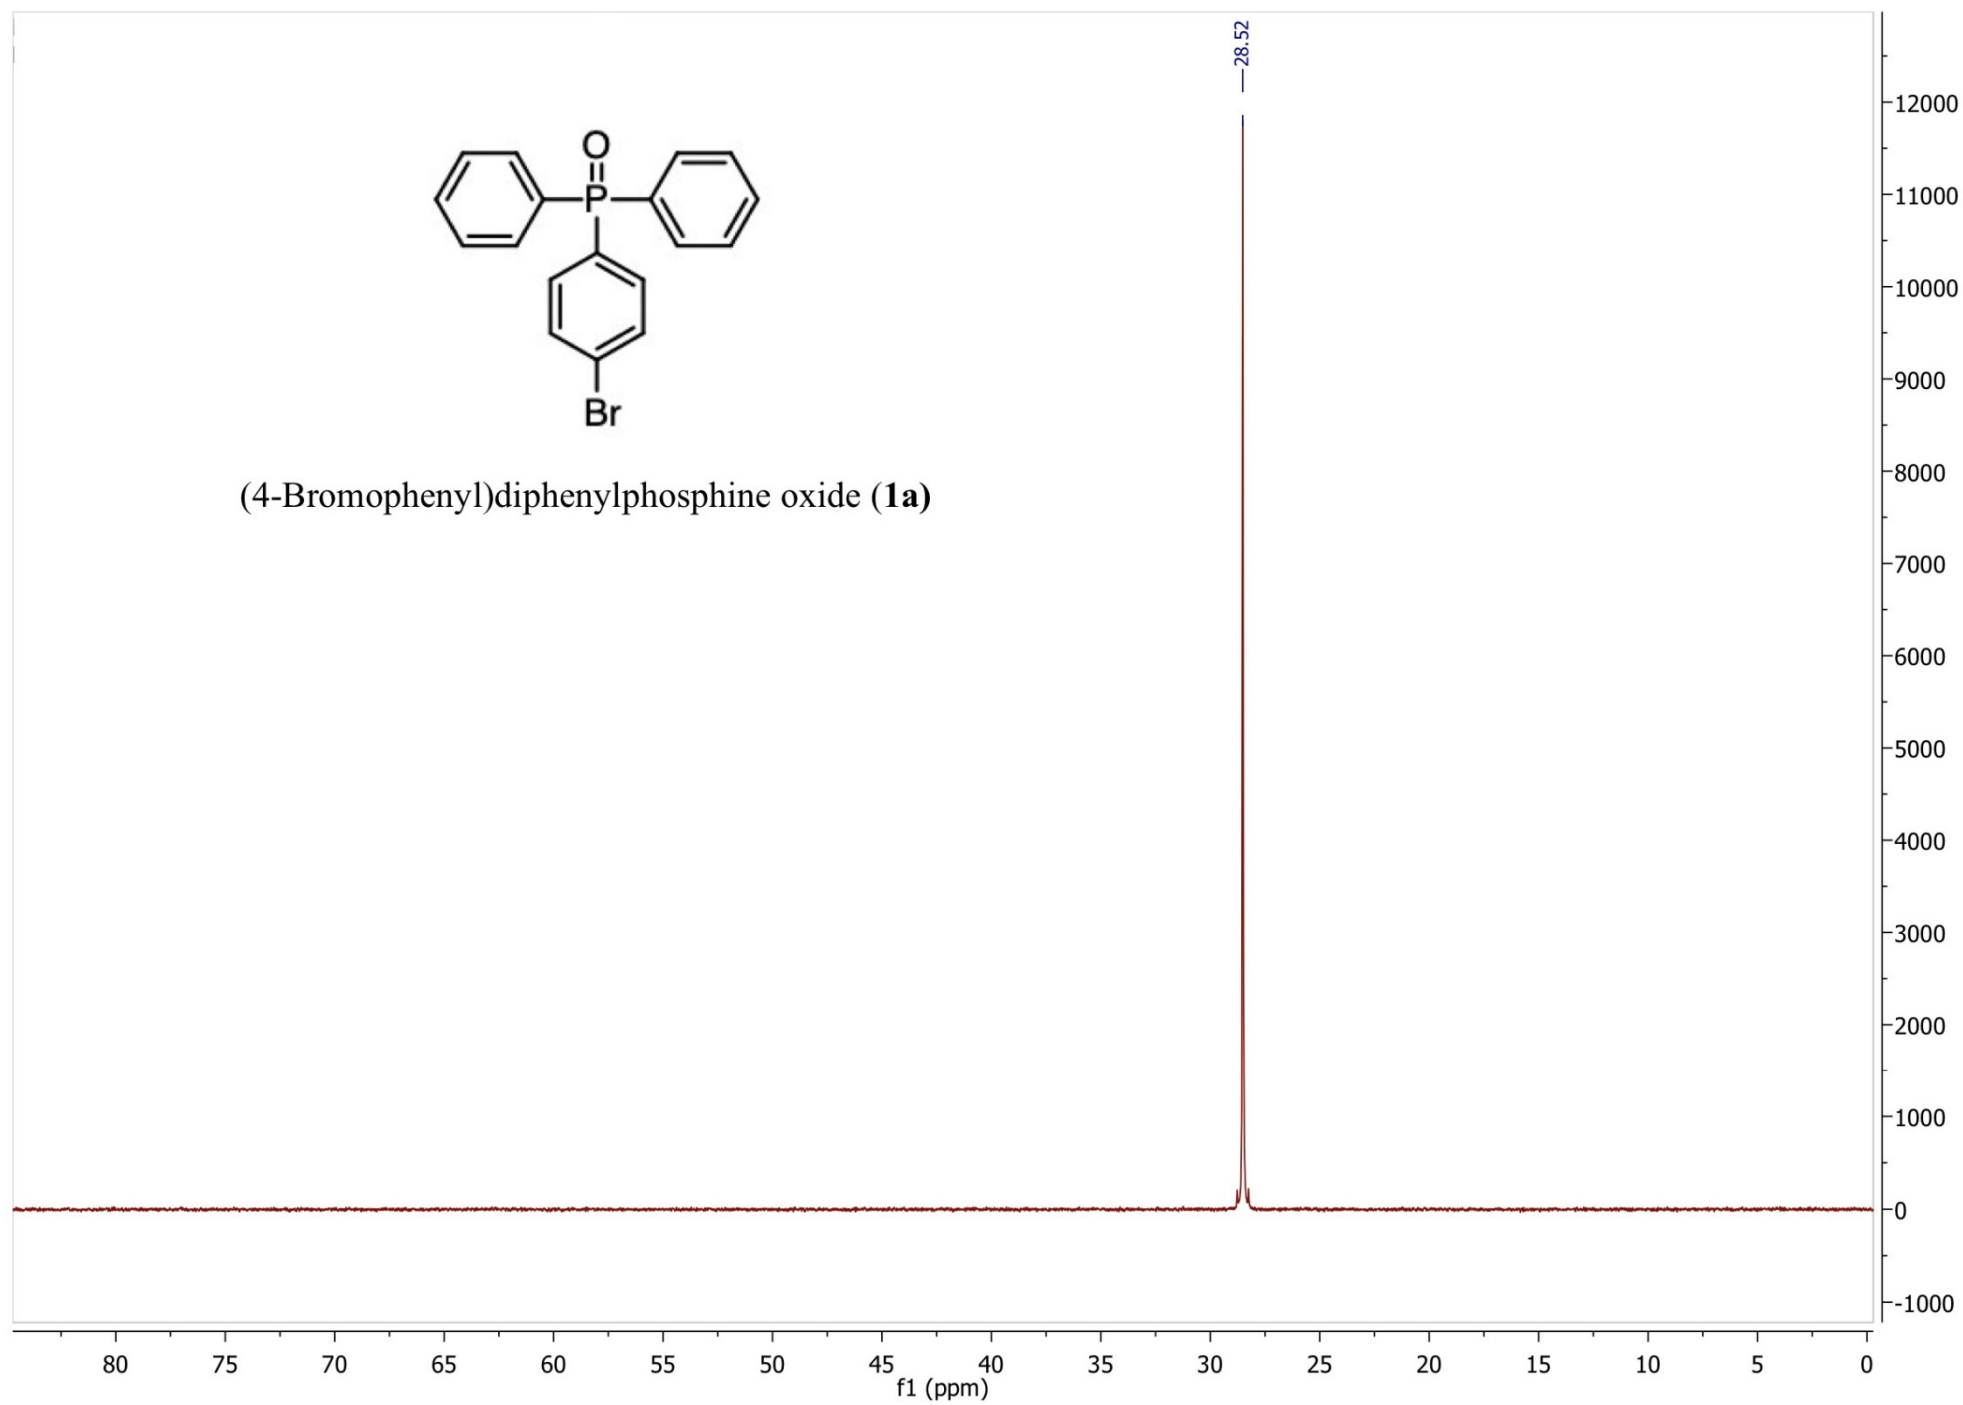

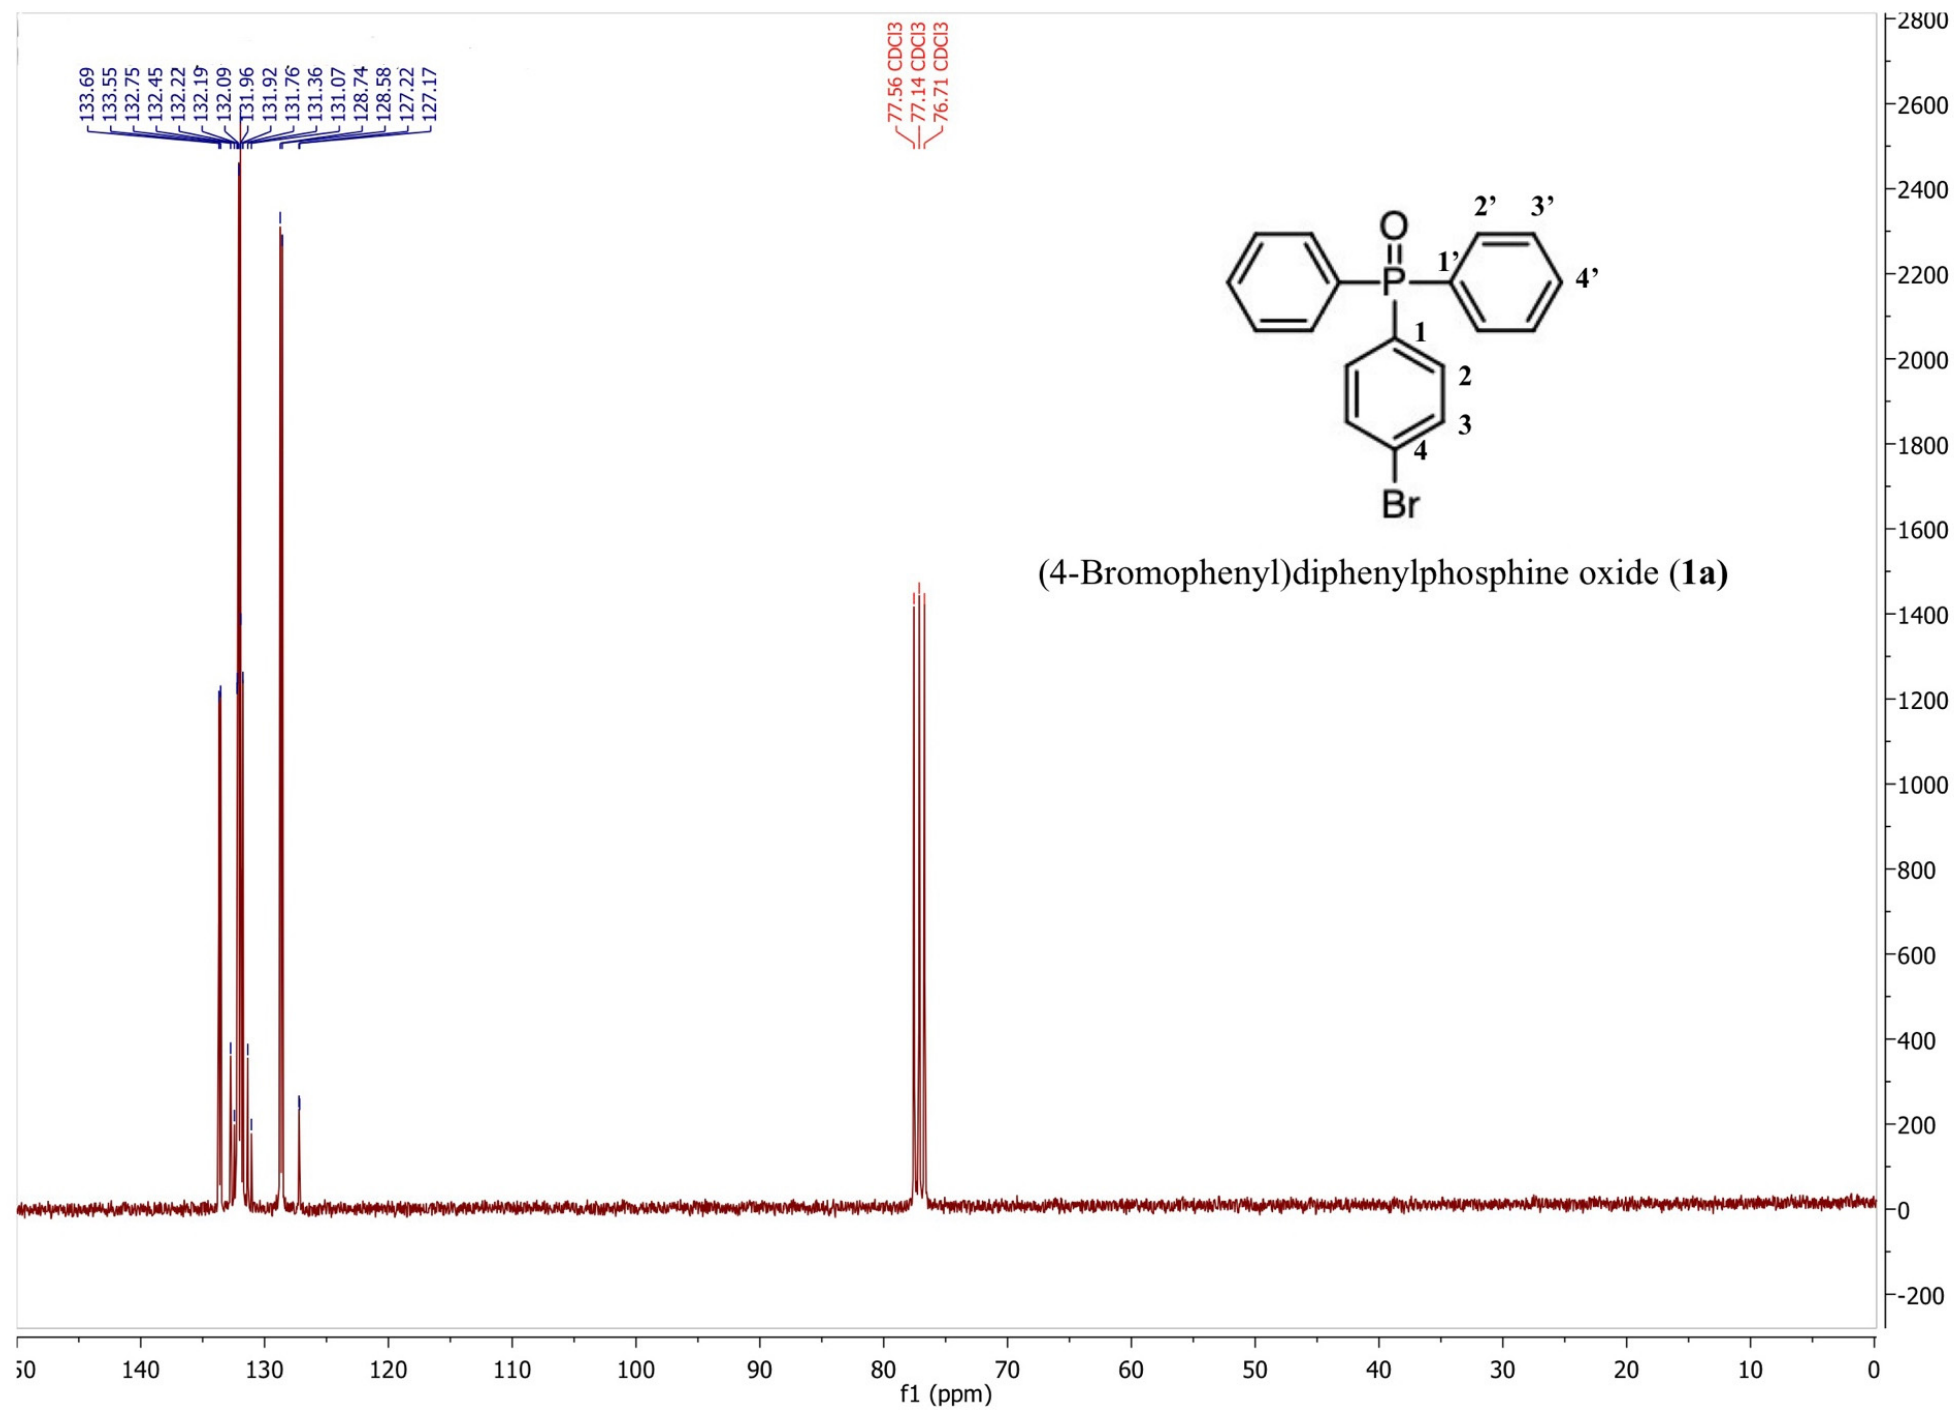

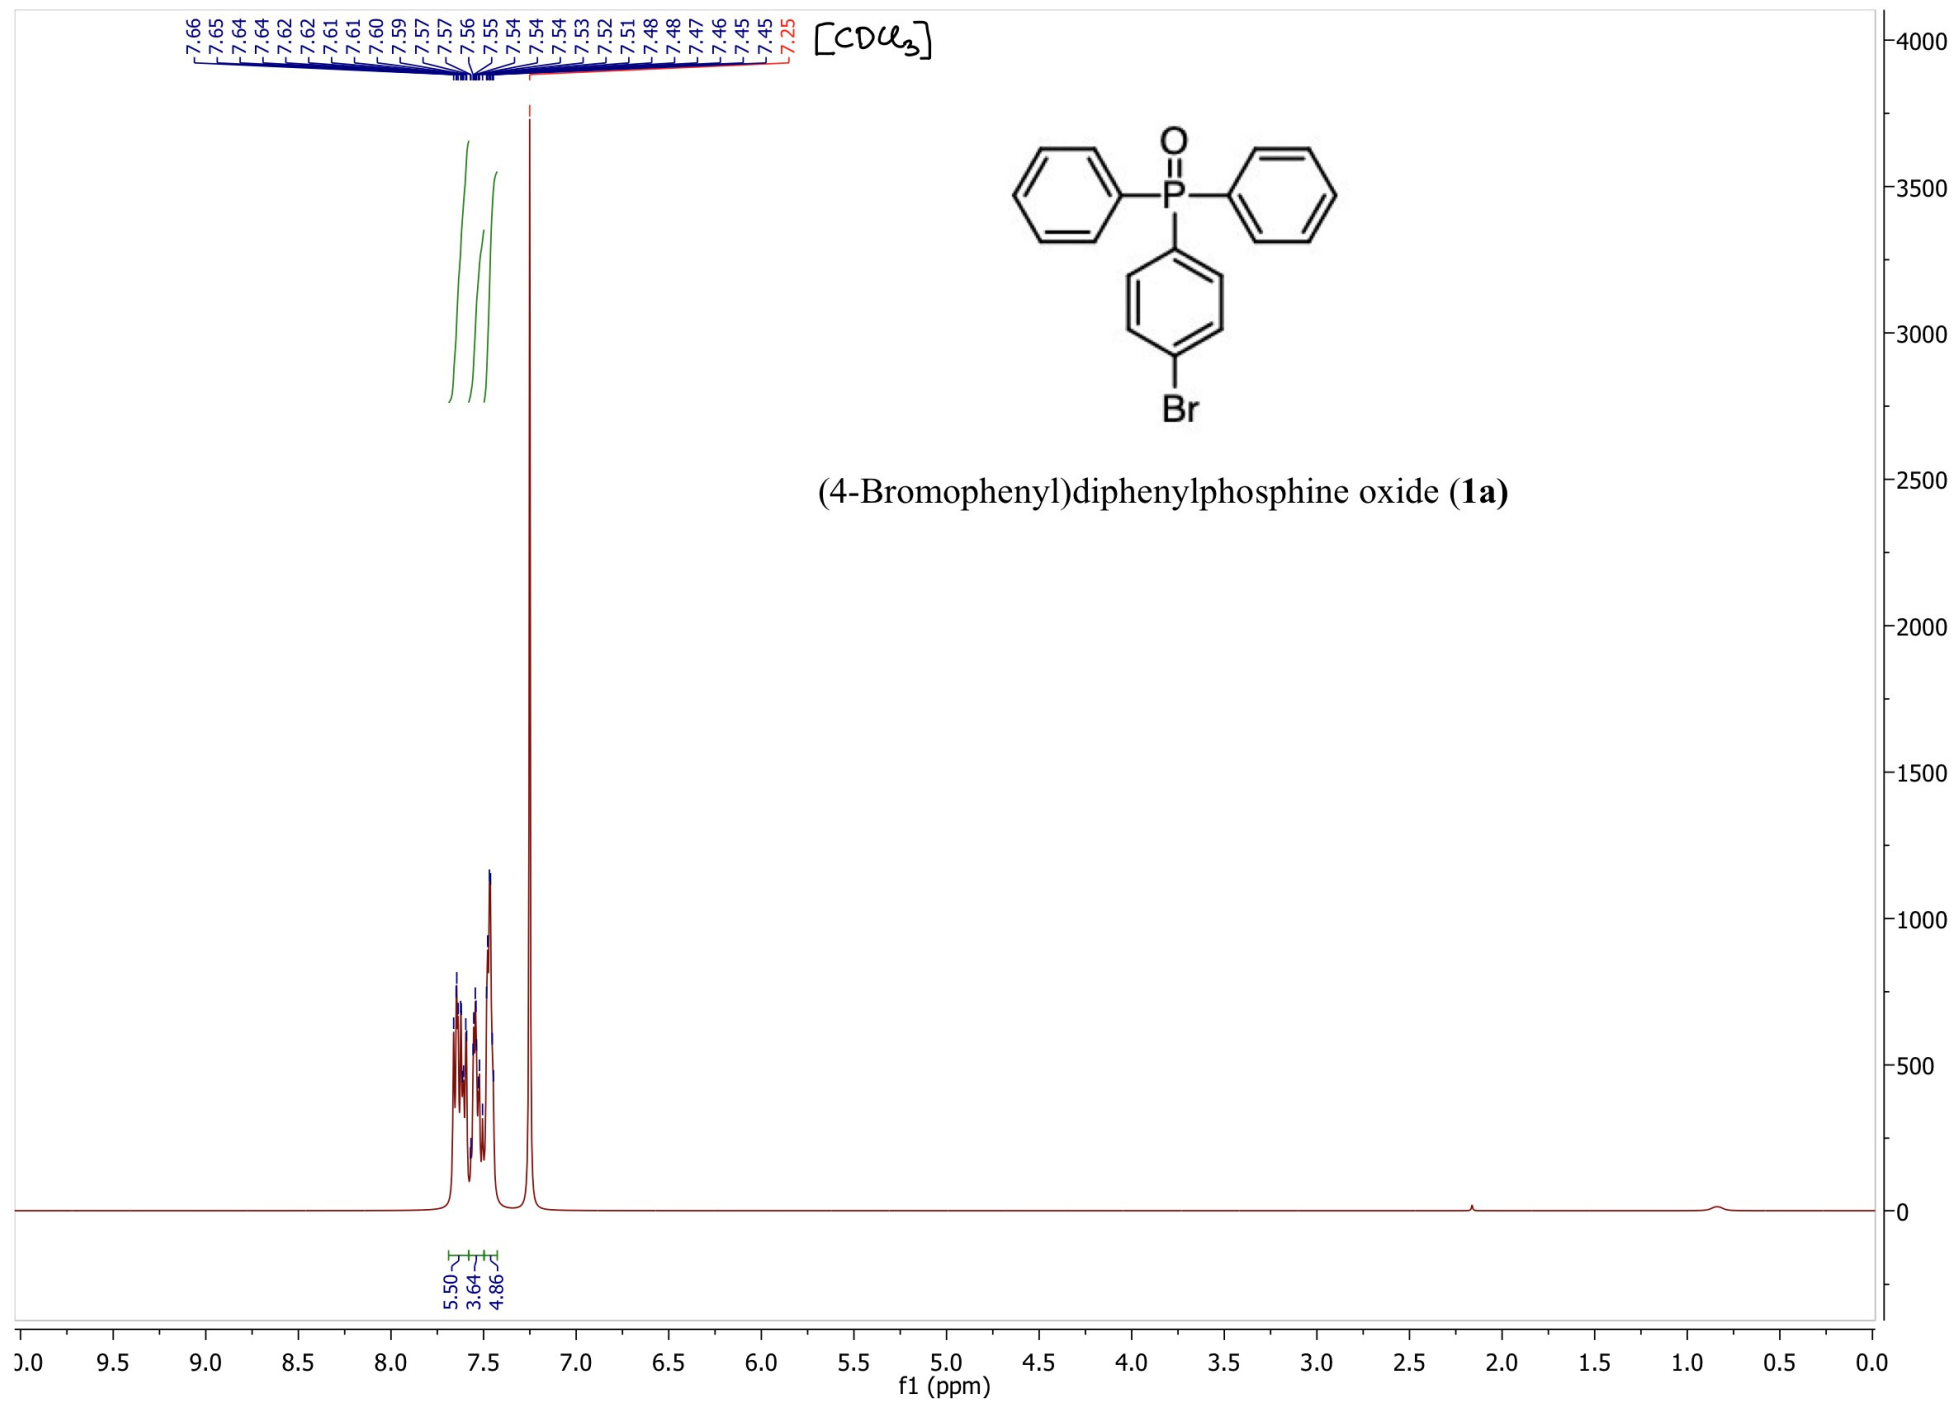



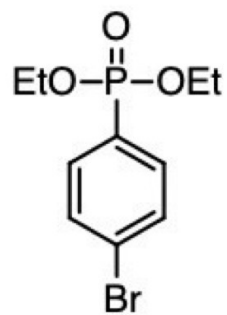

Diethyl 4-bromophenylphosphonate (**1b**)

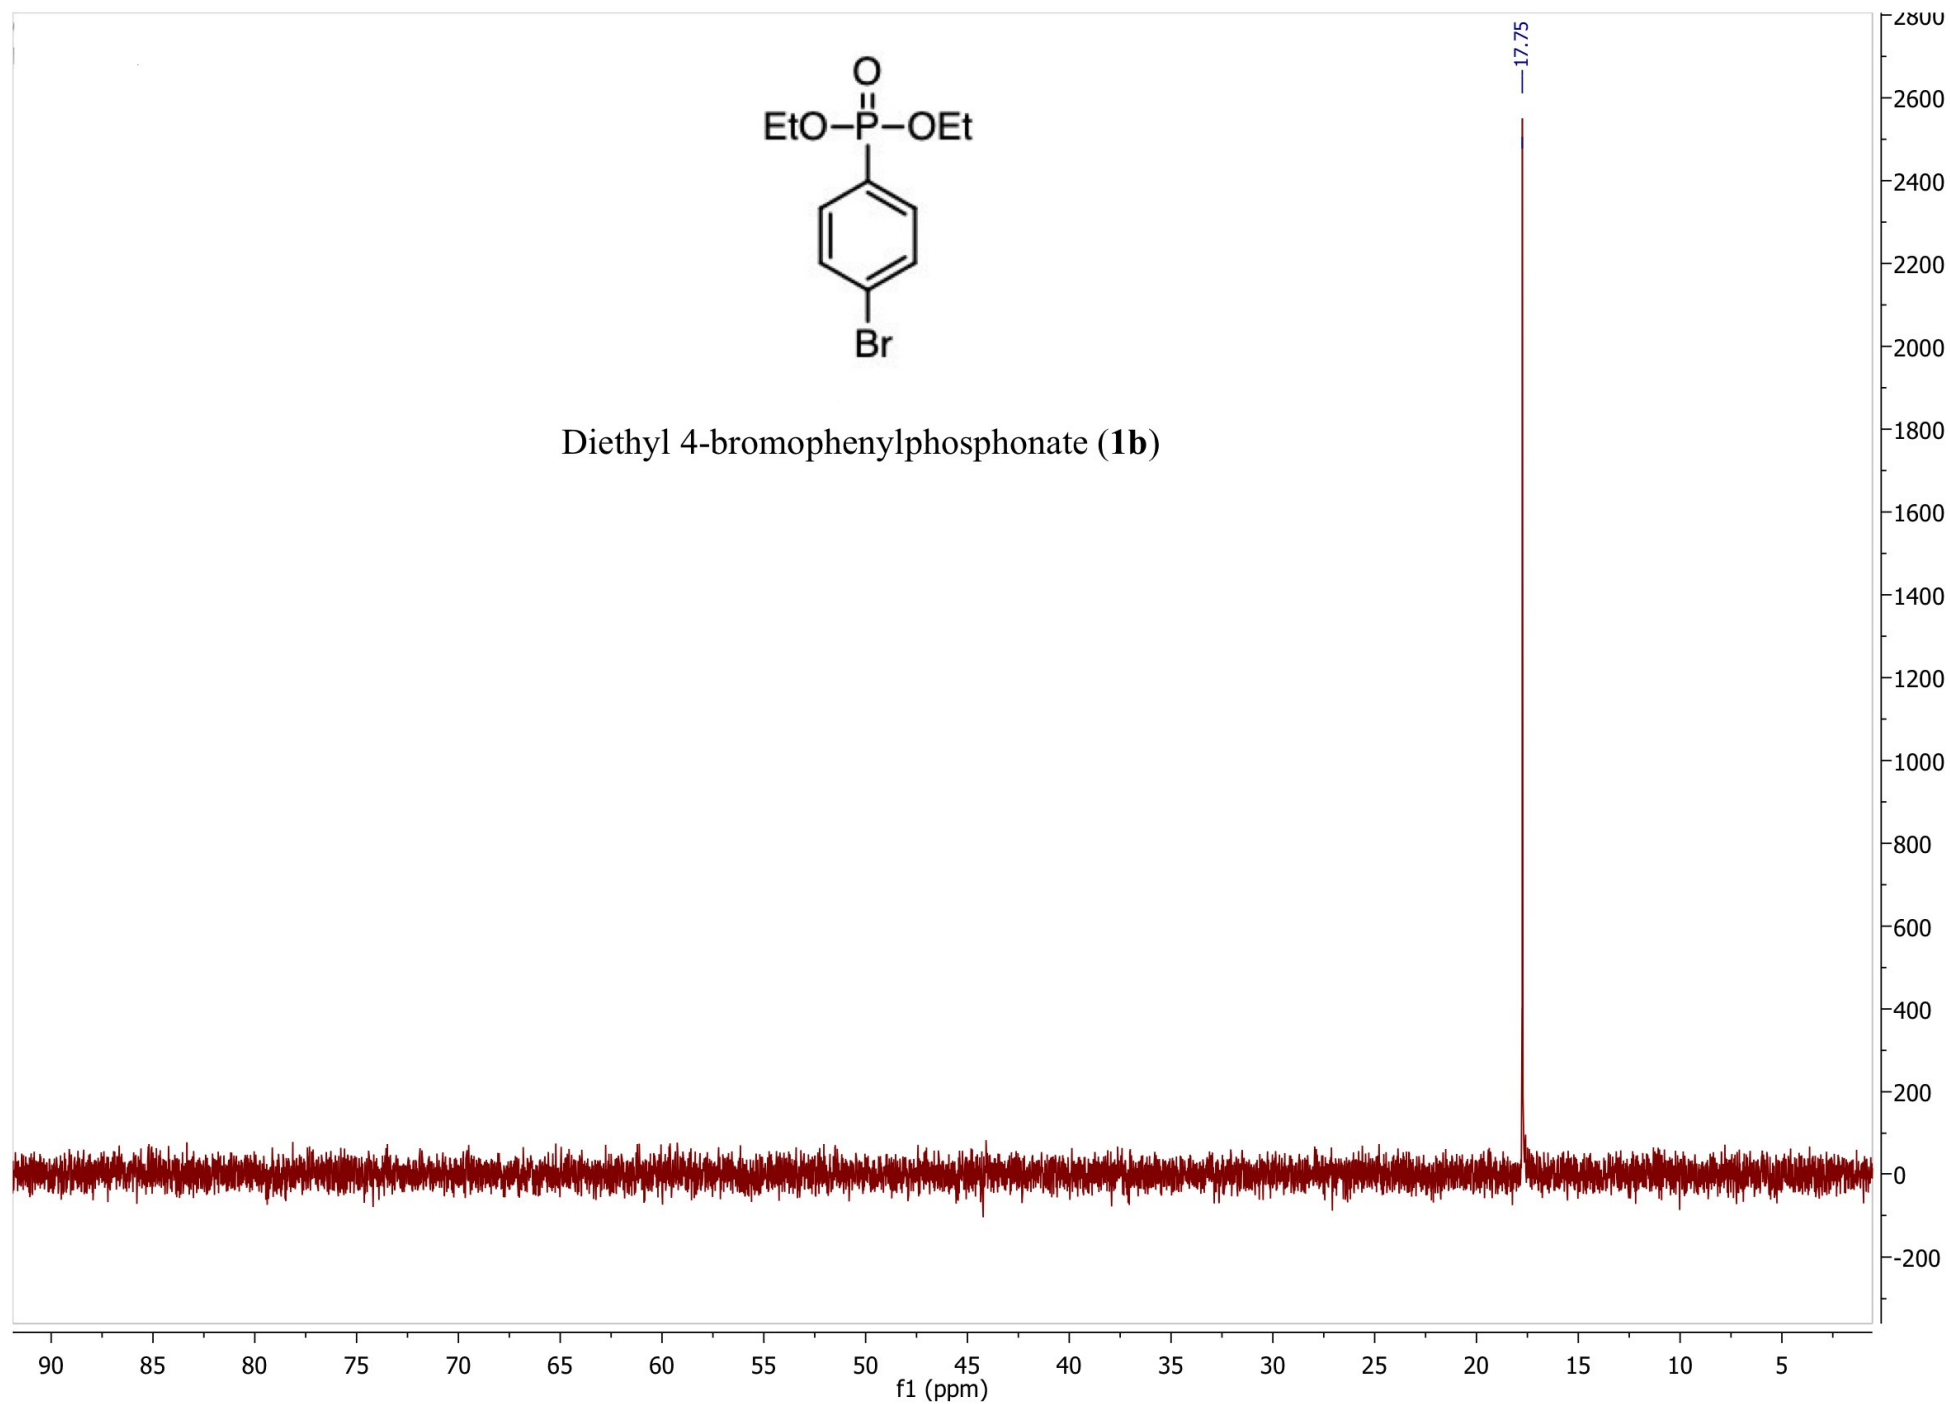

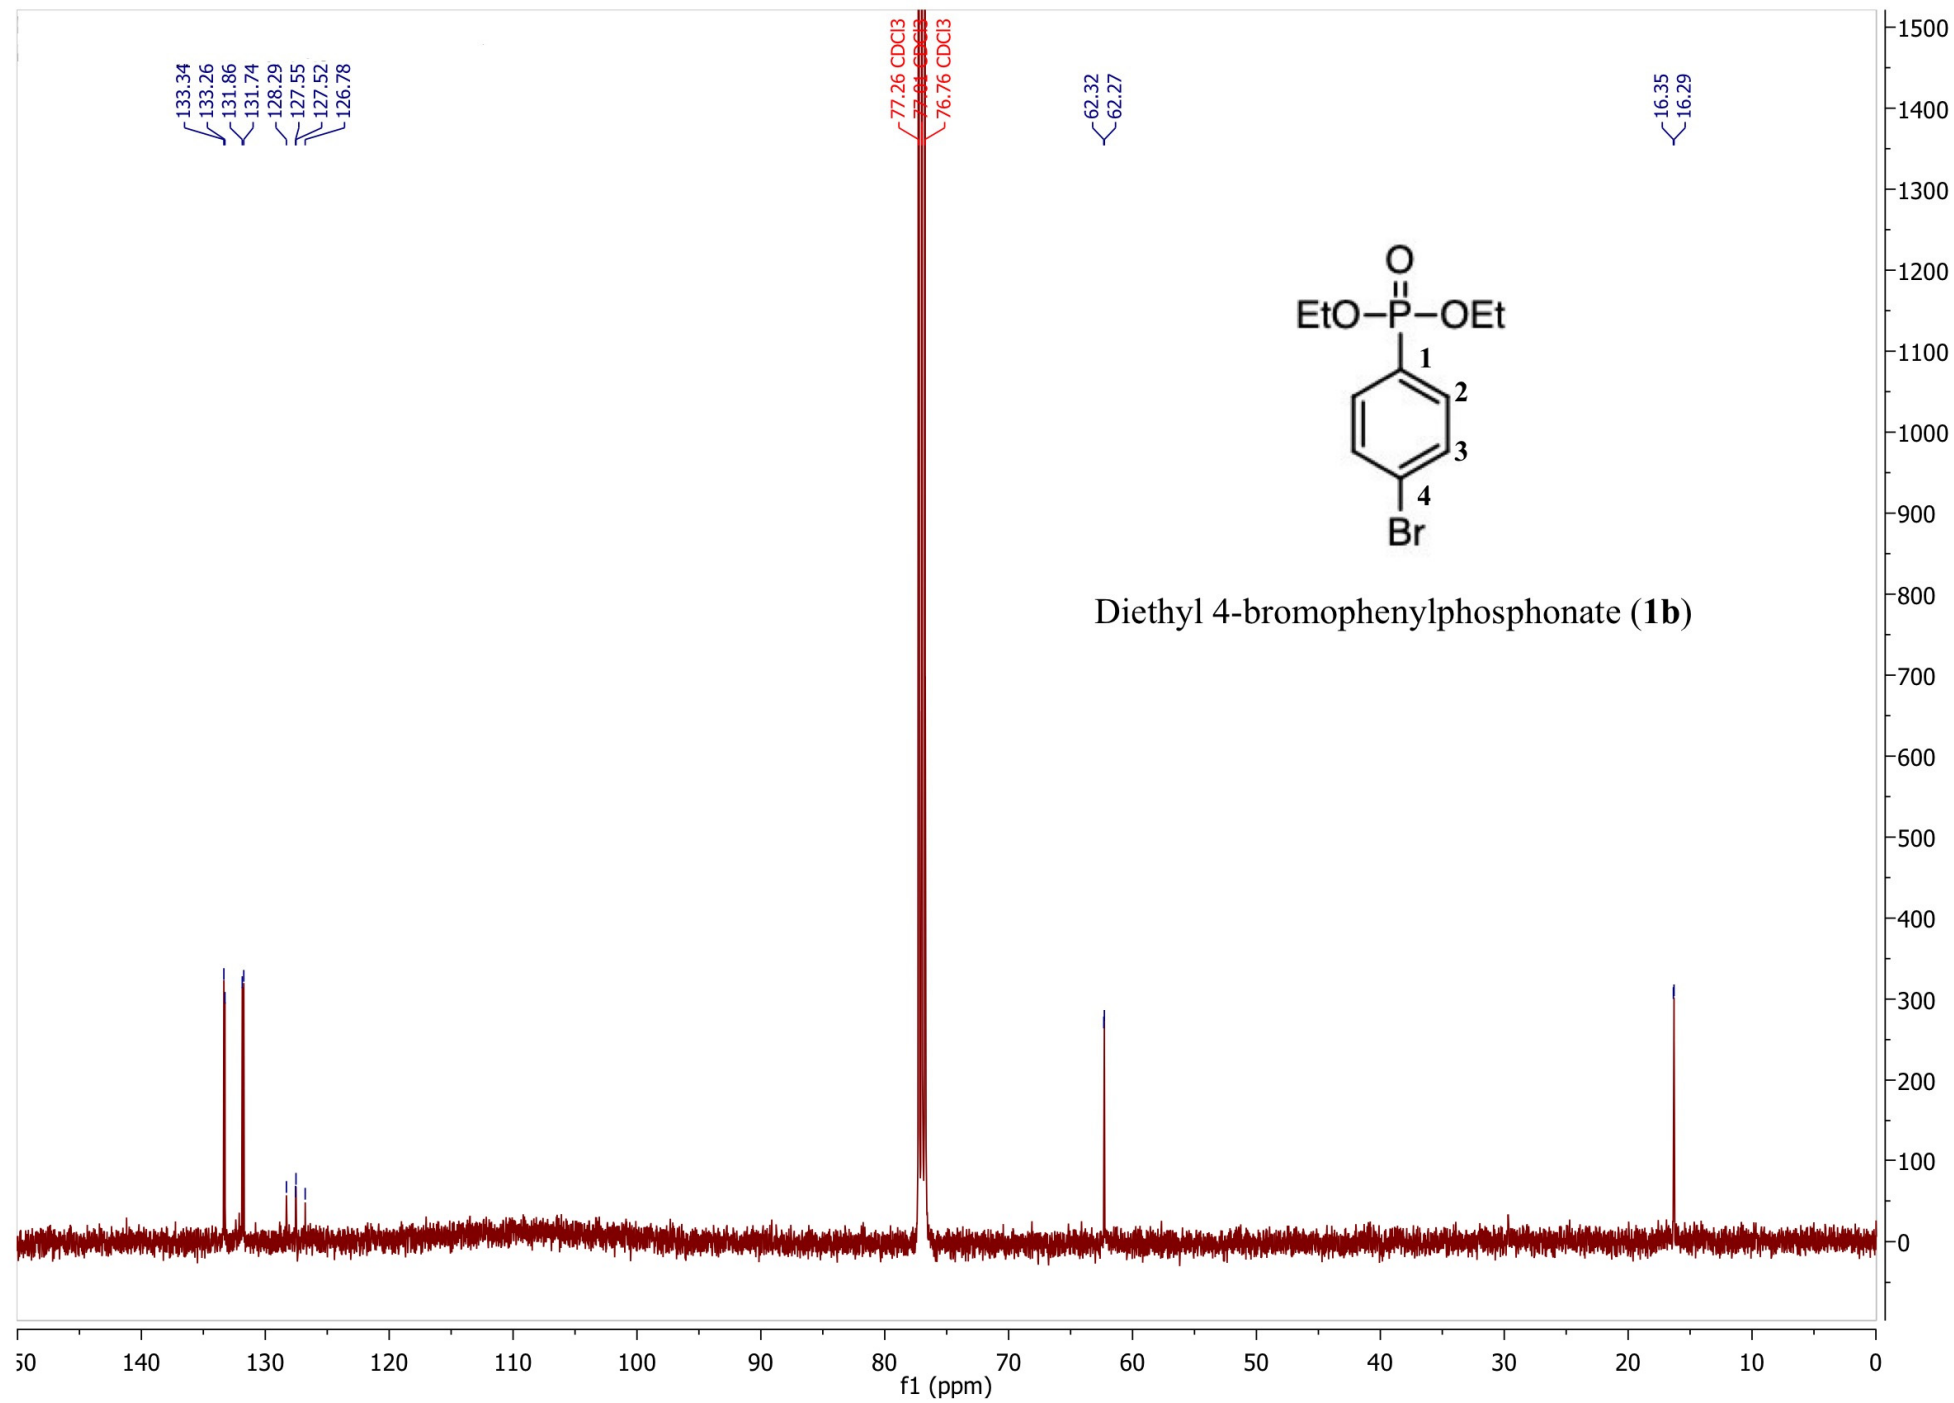

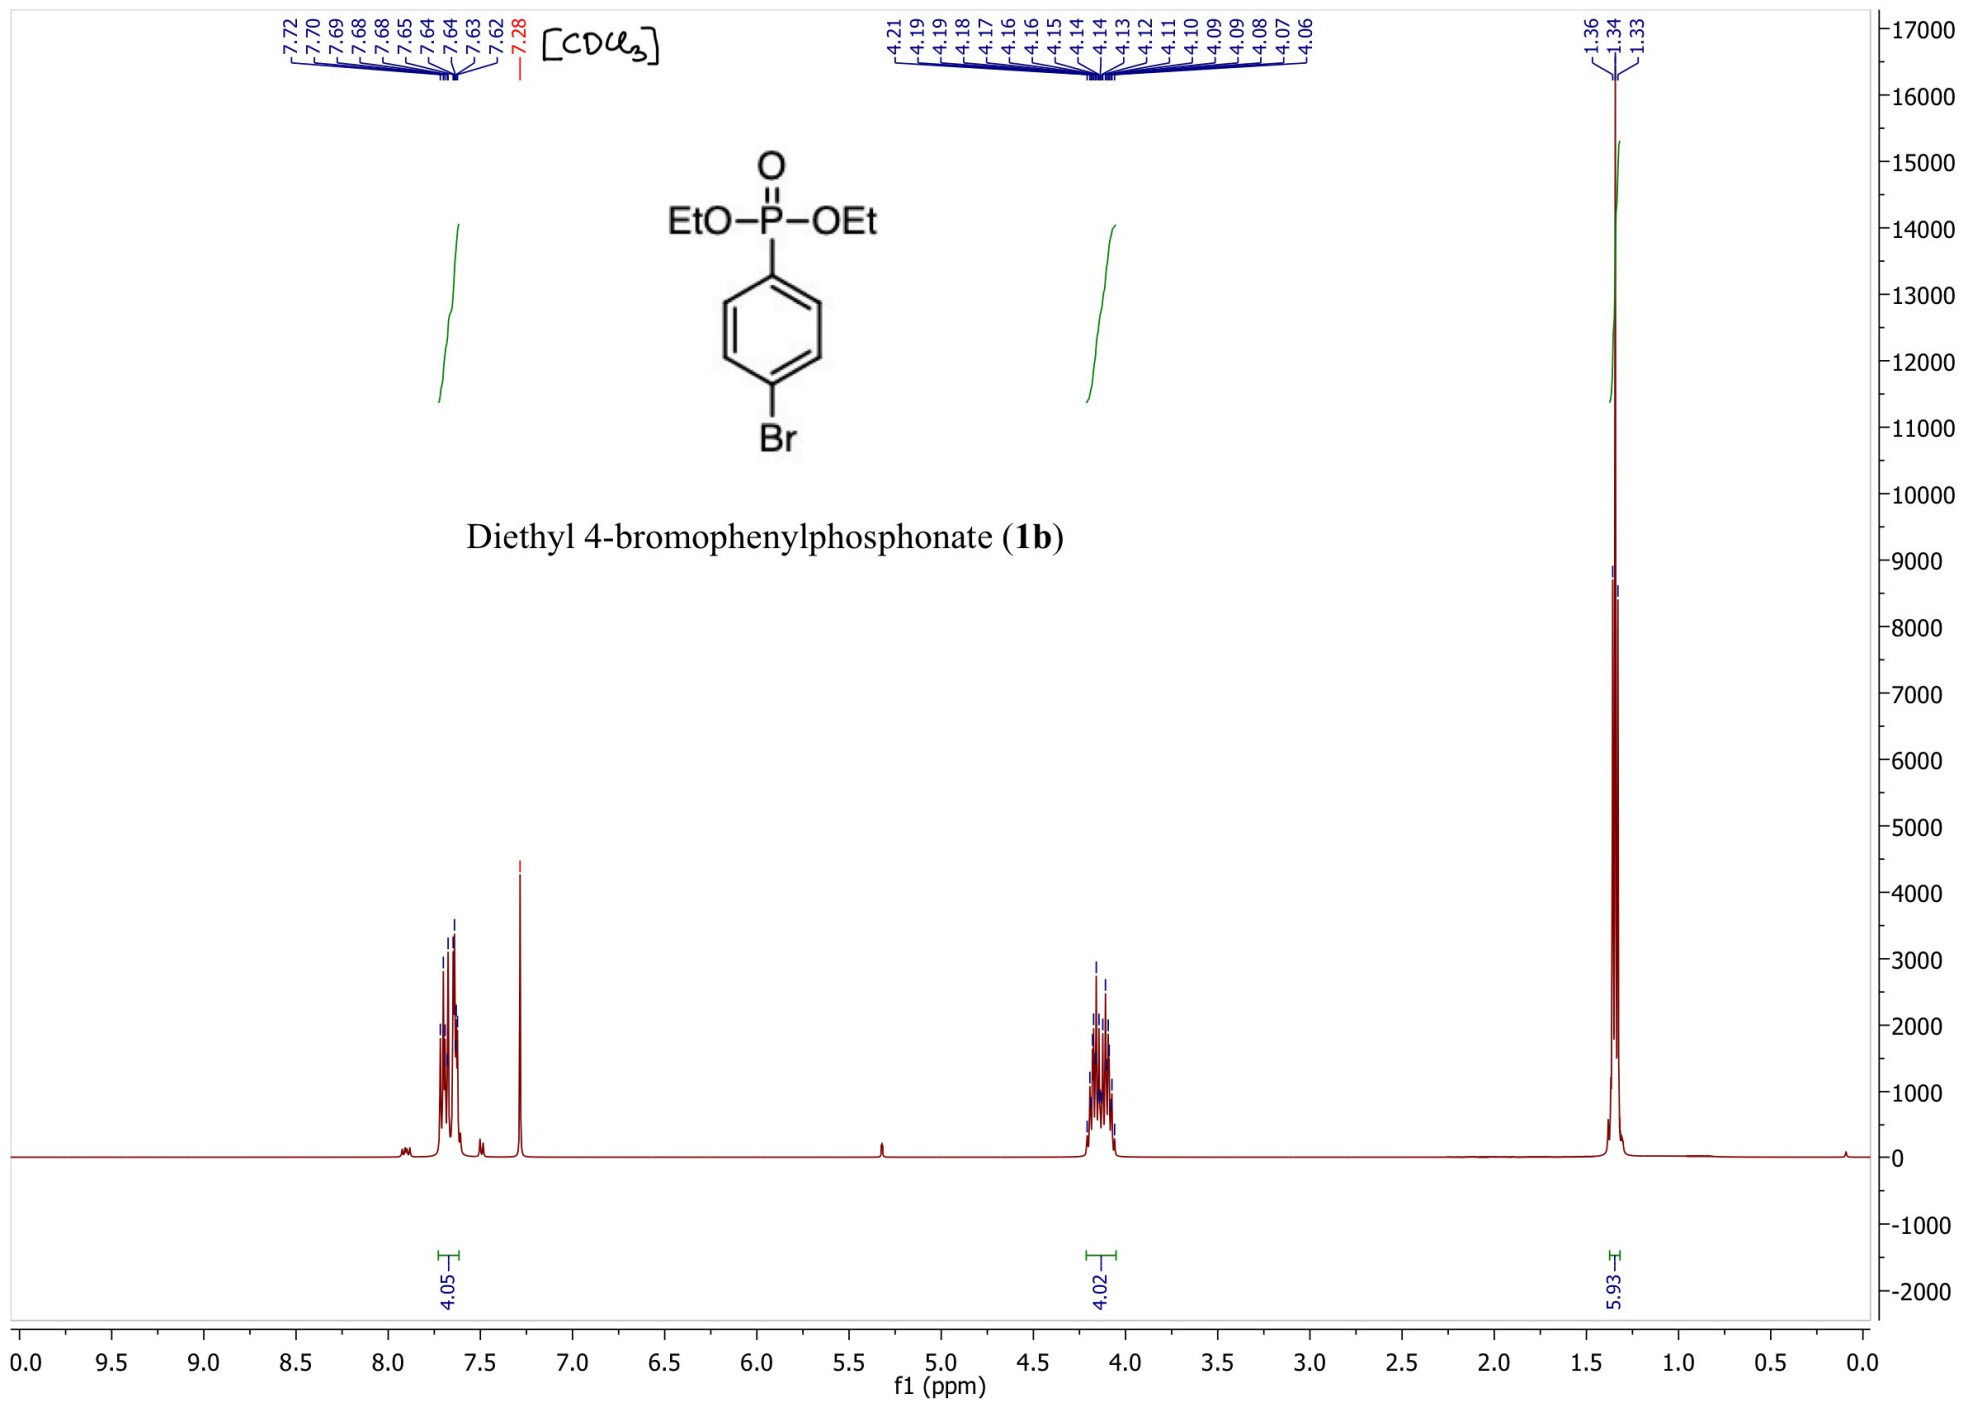

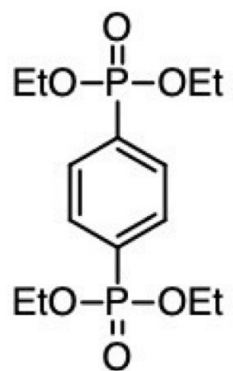

Tetraethyl 1,4-phenylenebisphosphonate (**2b**)

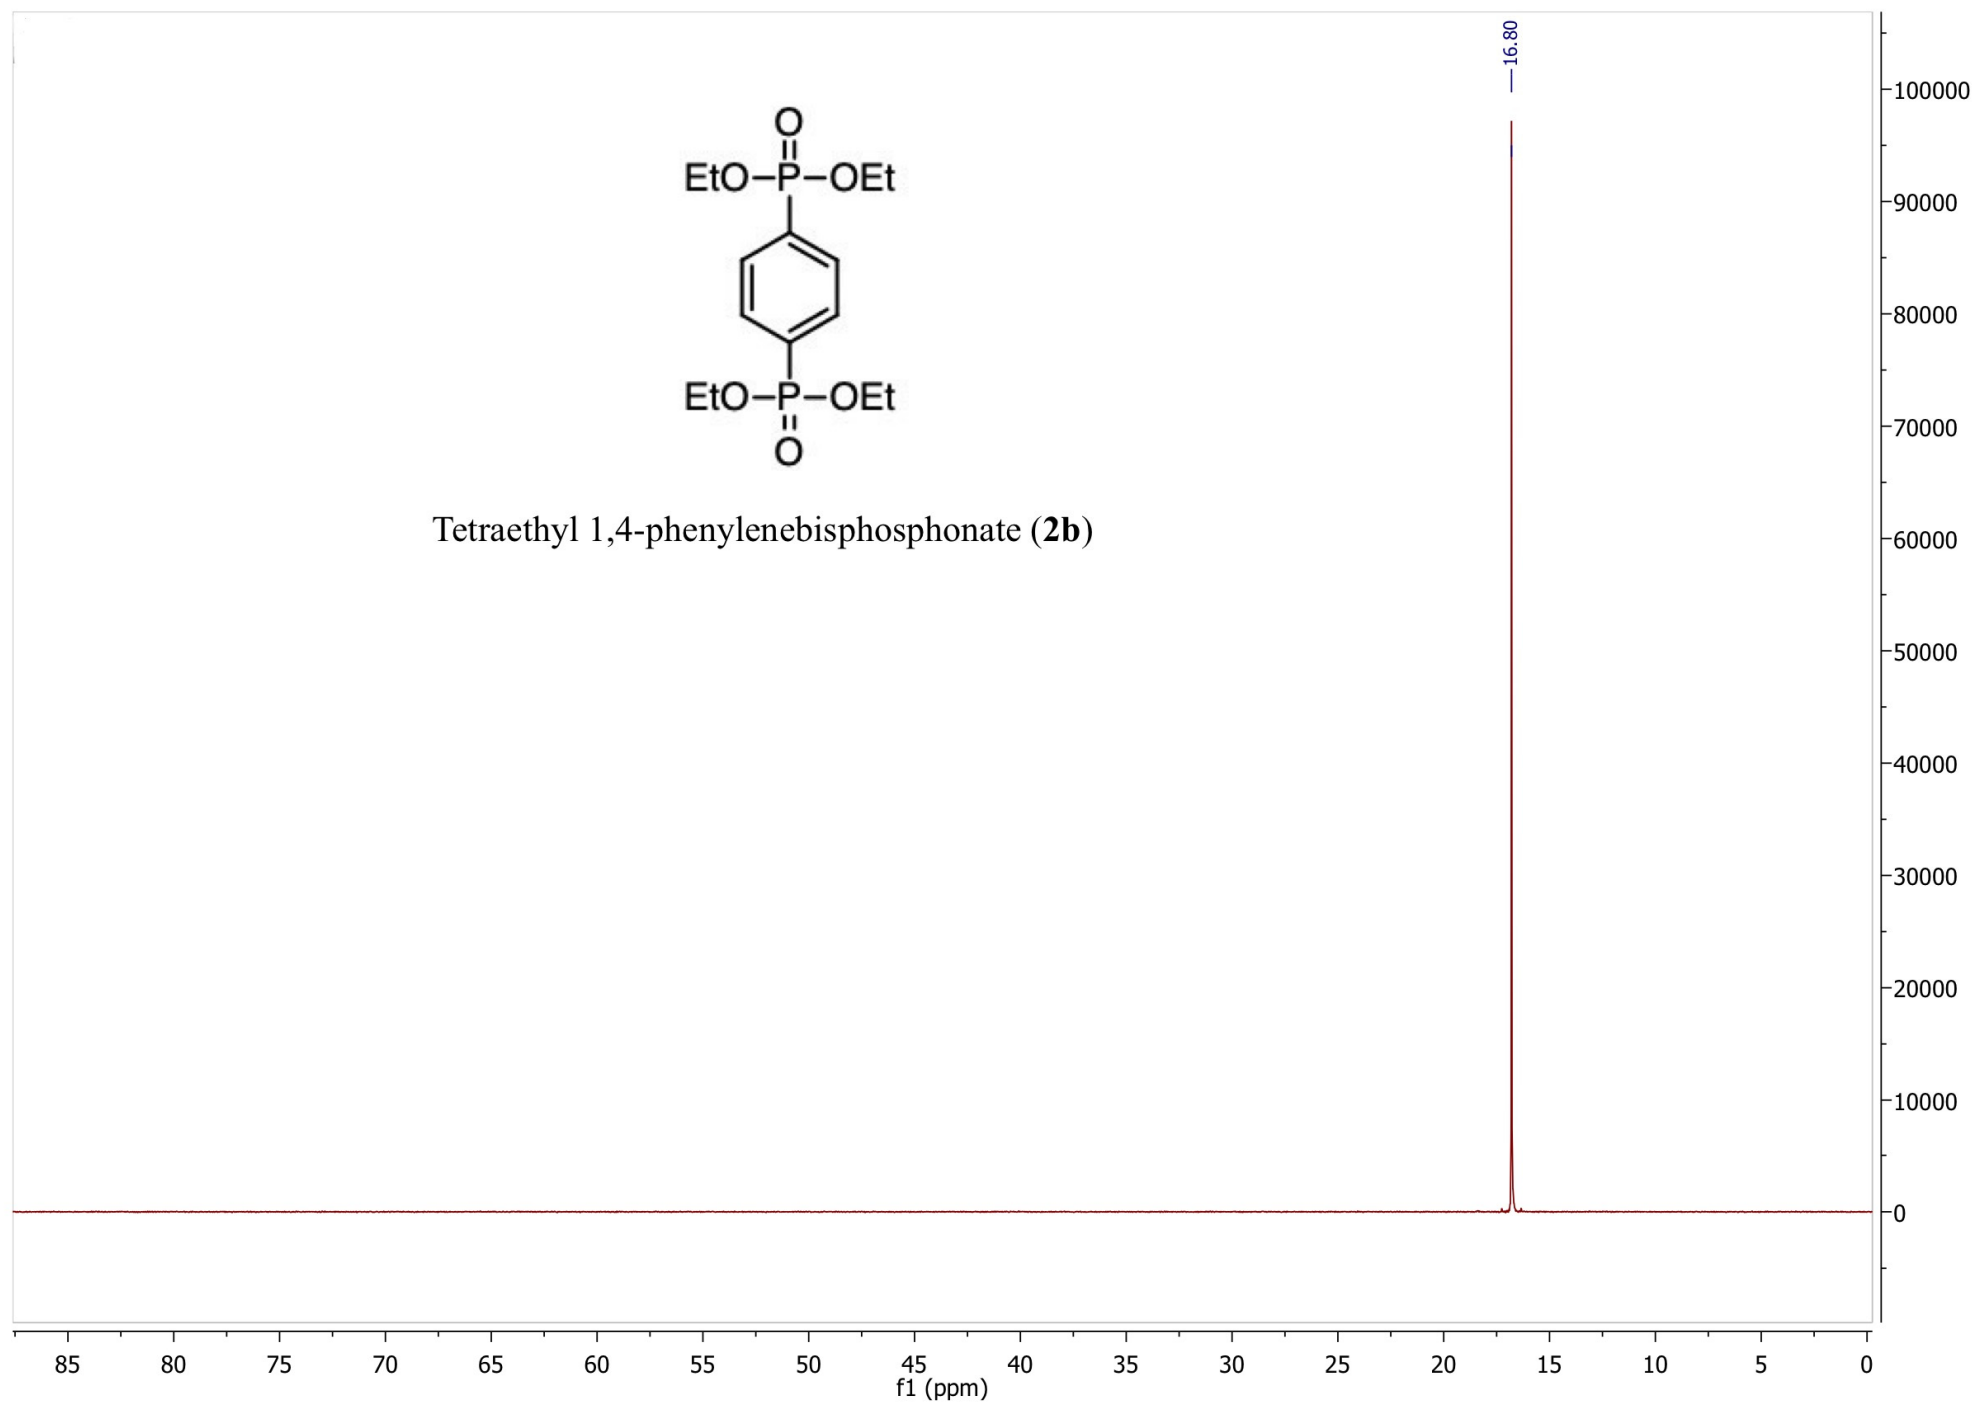

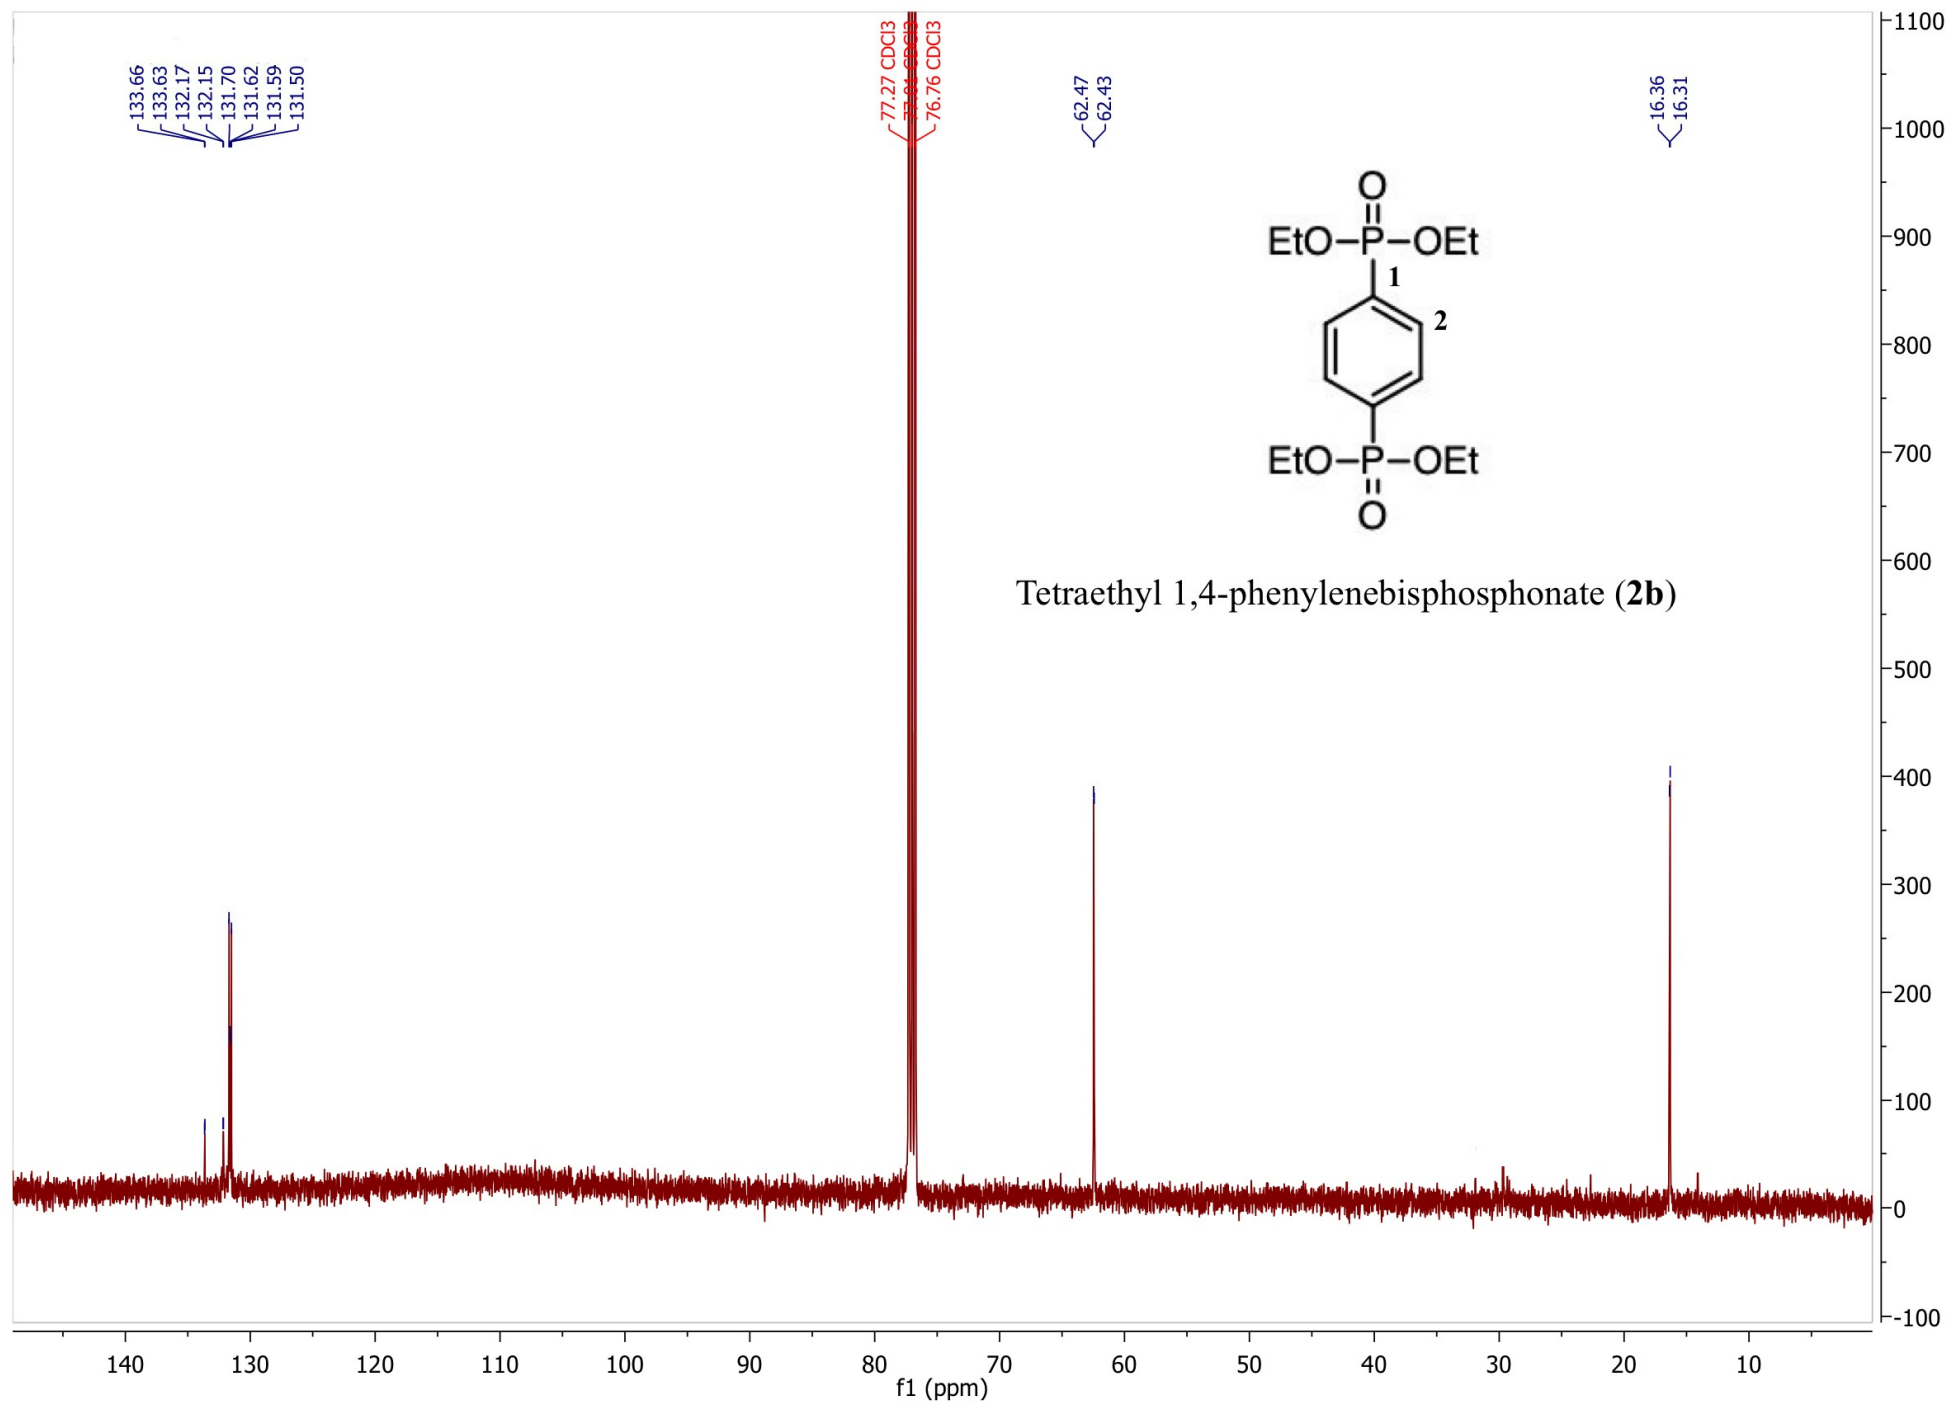

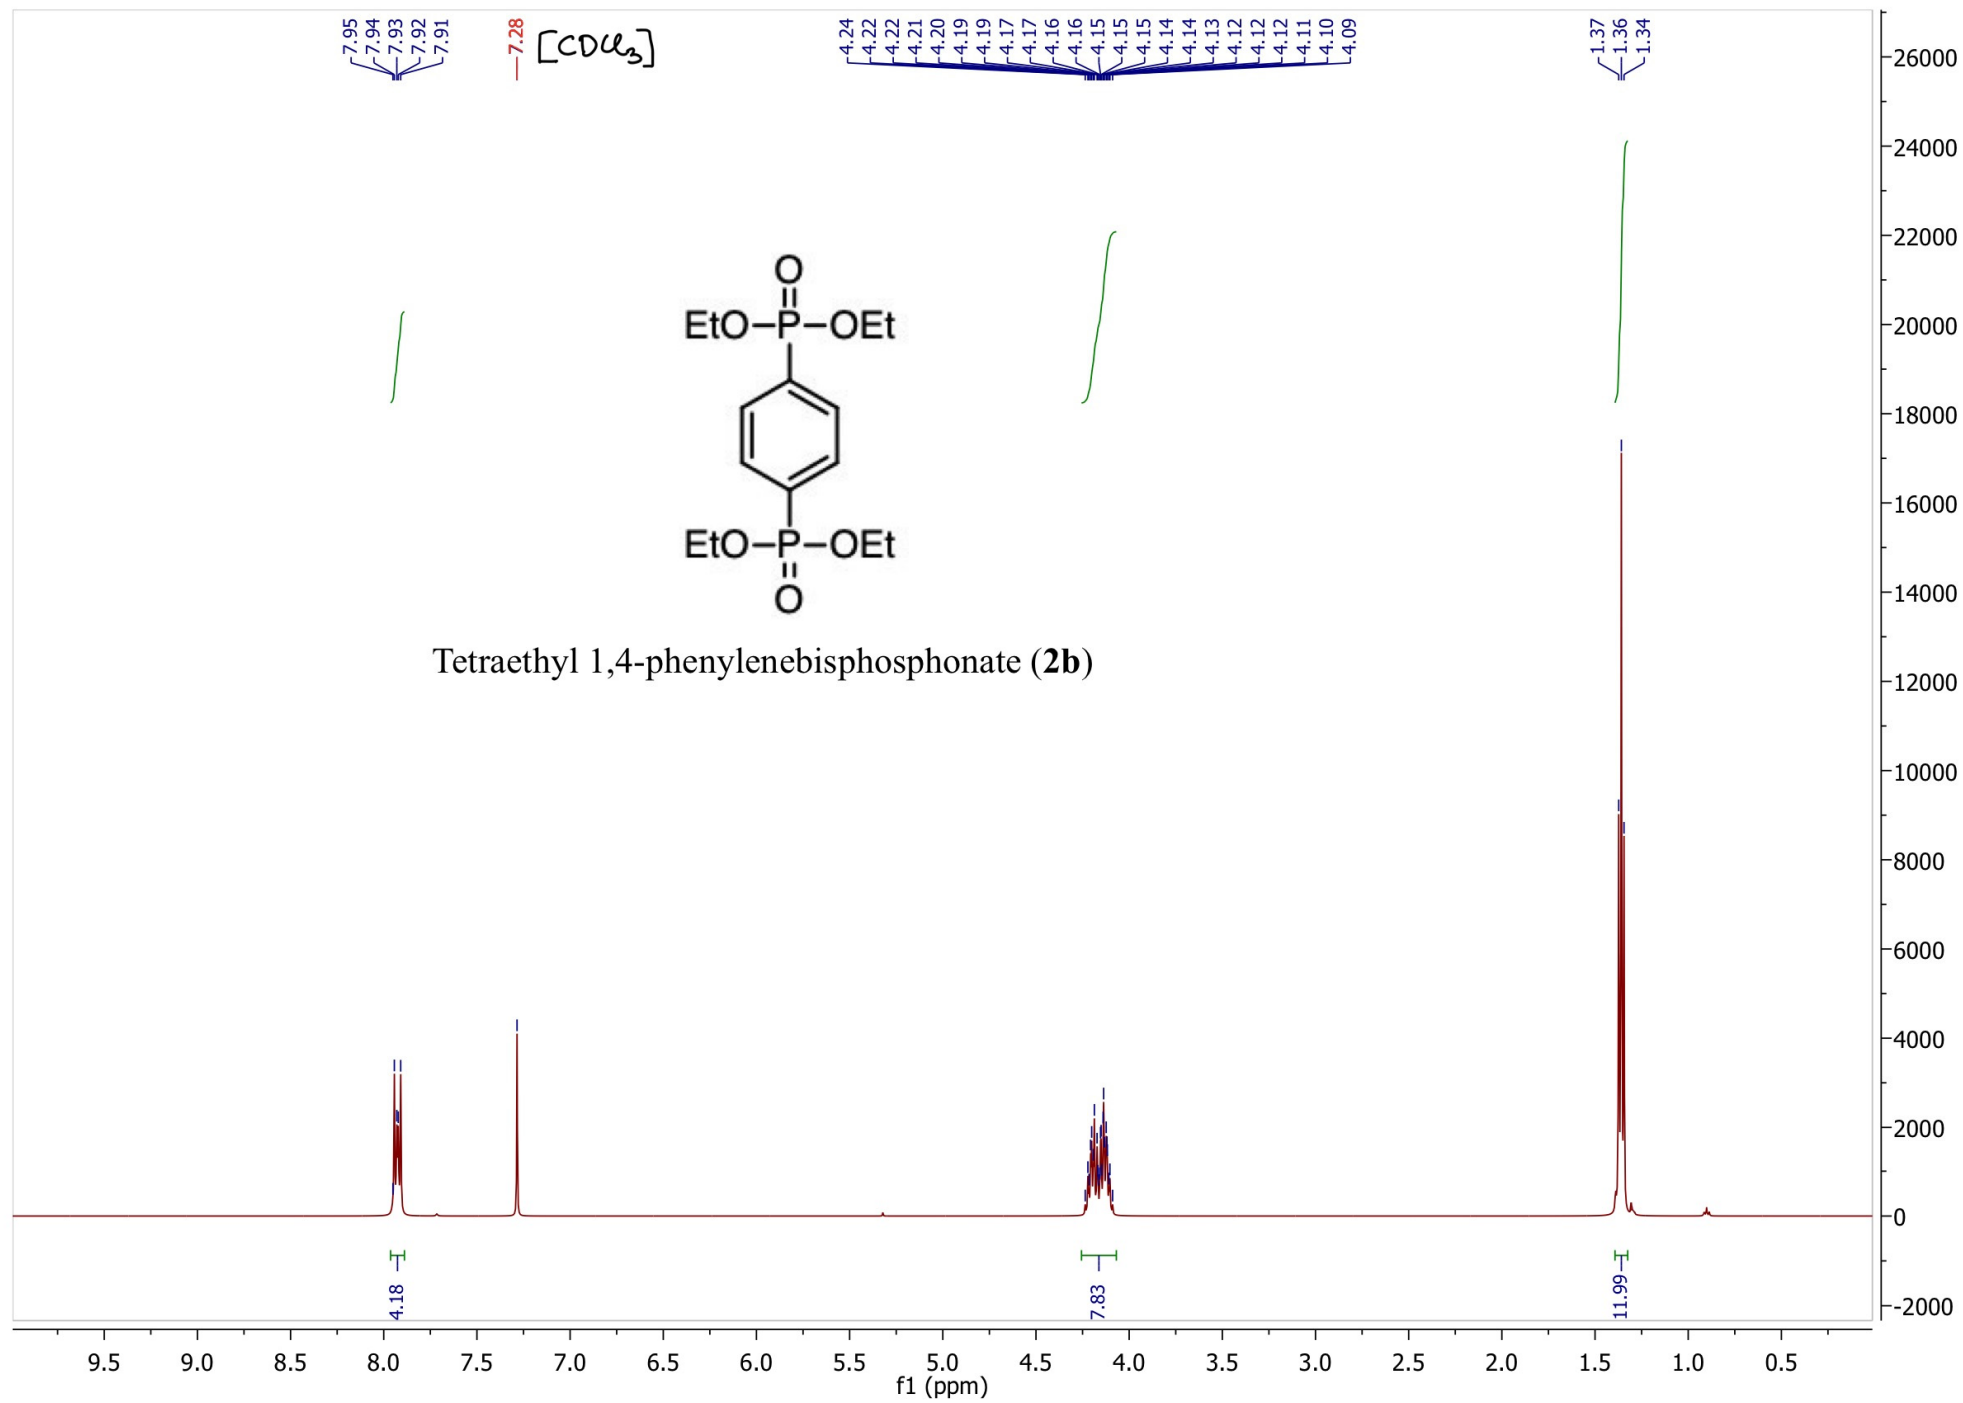

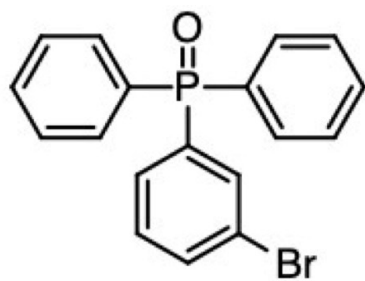

(3-Bromophenyl)diphenylphosphine oxide (**3a**)

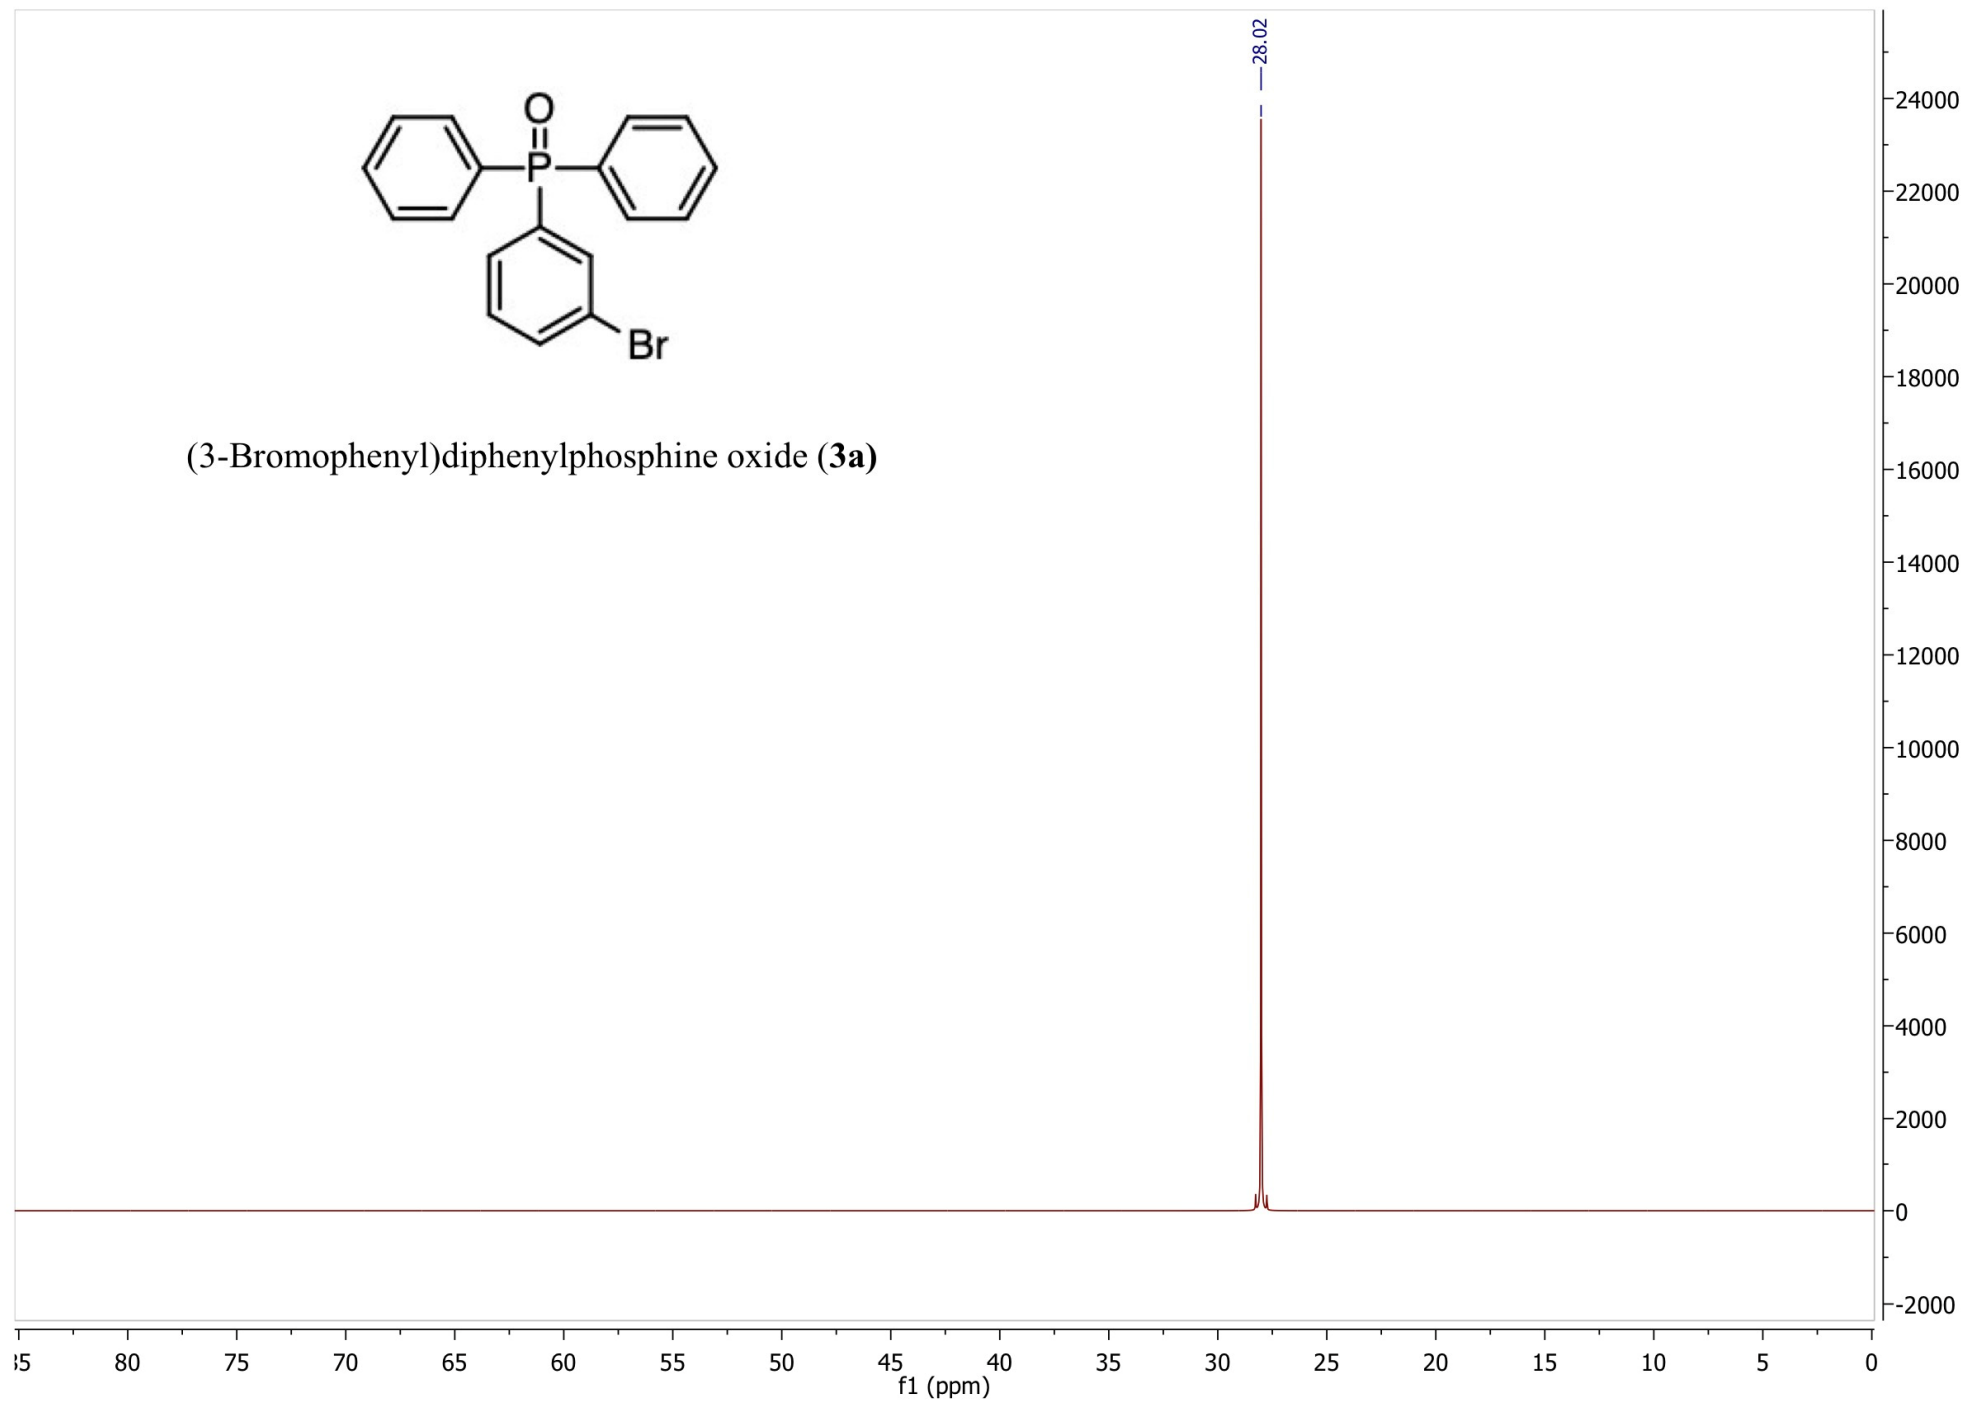

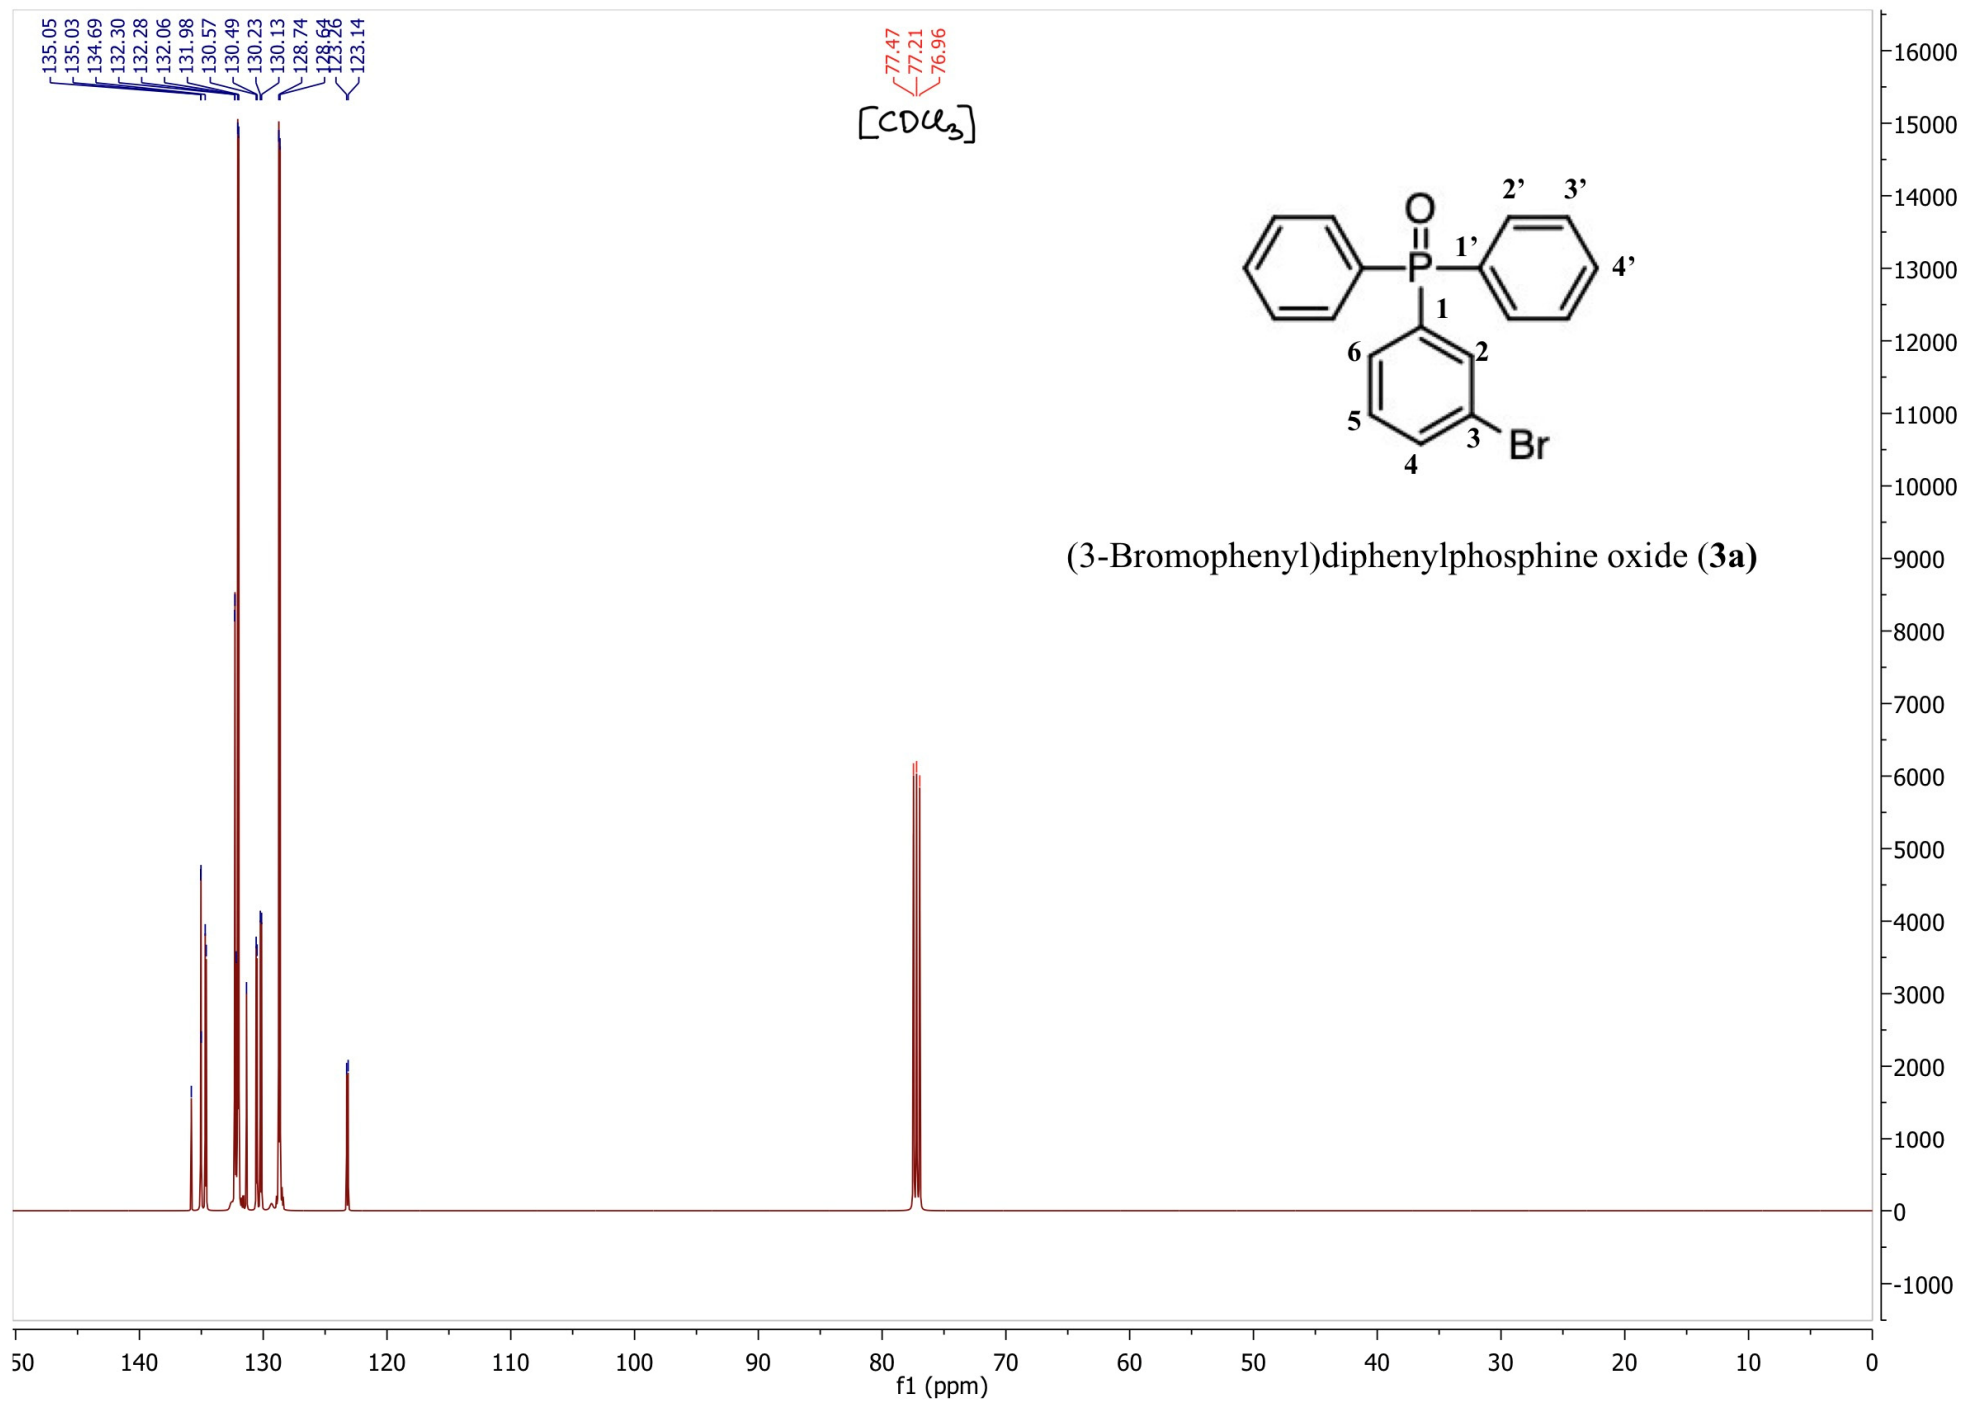



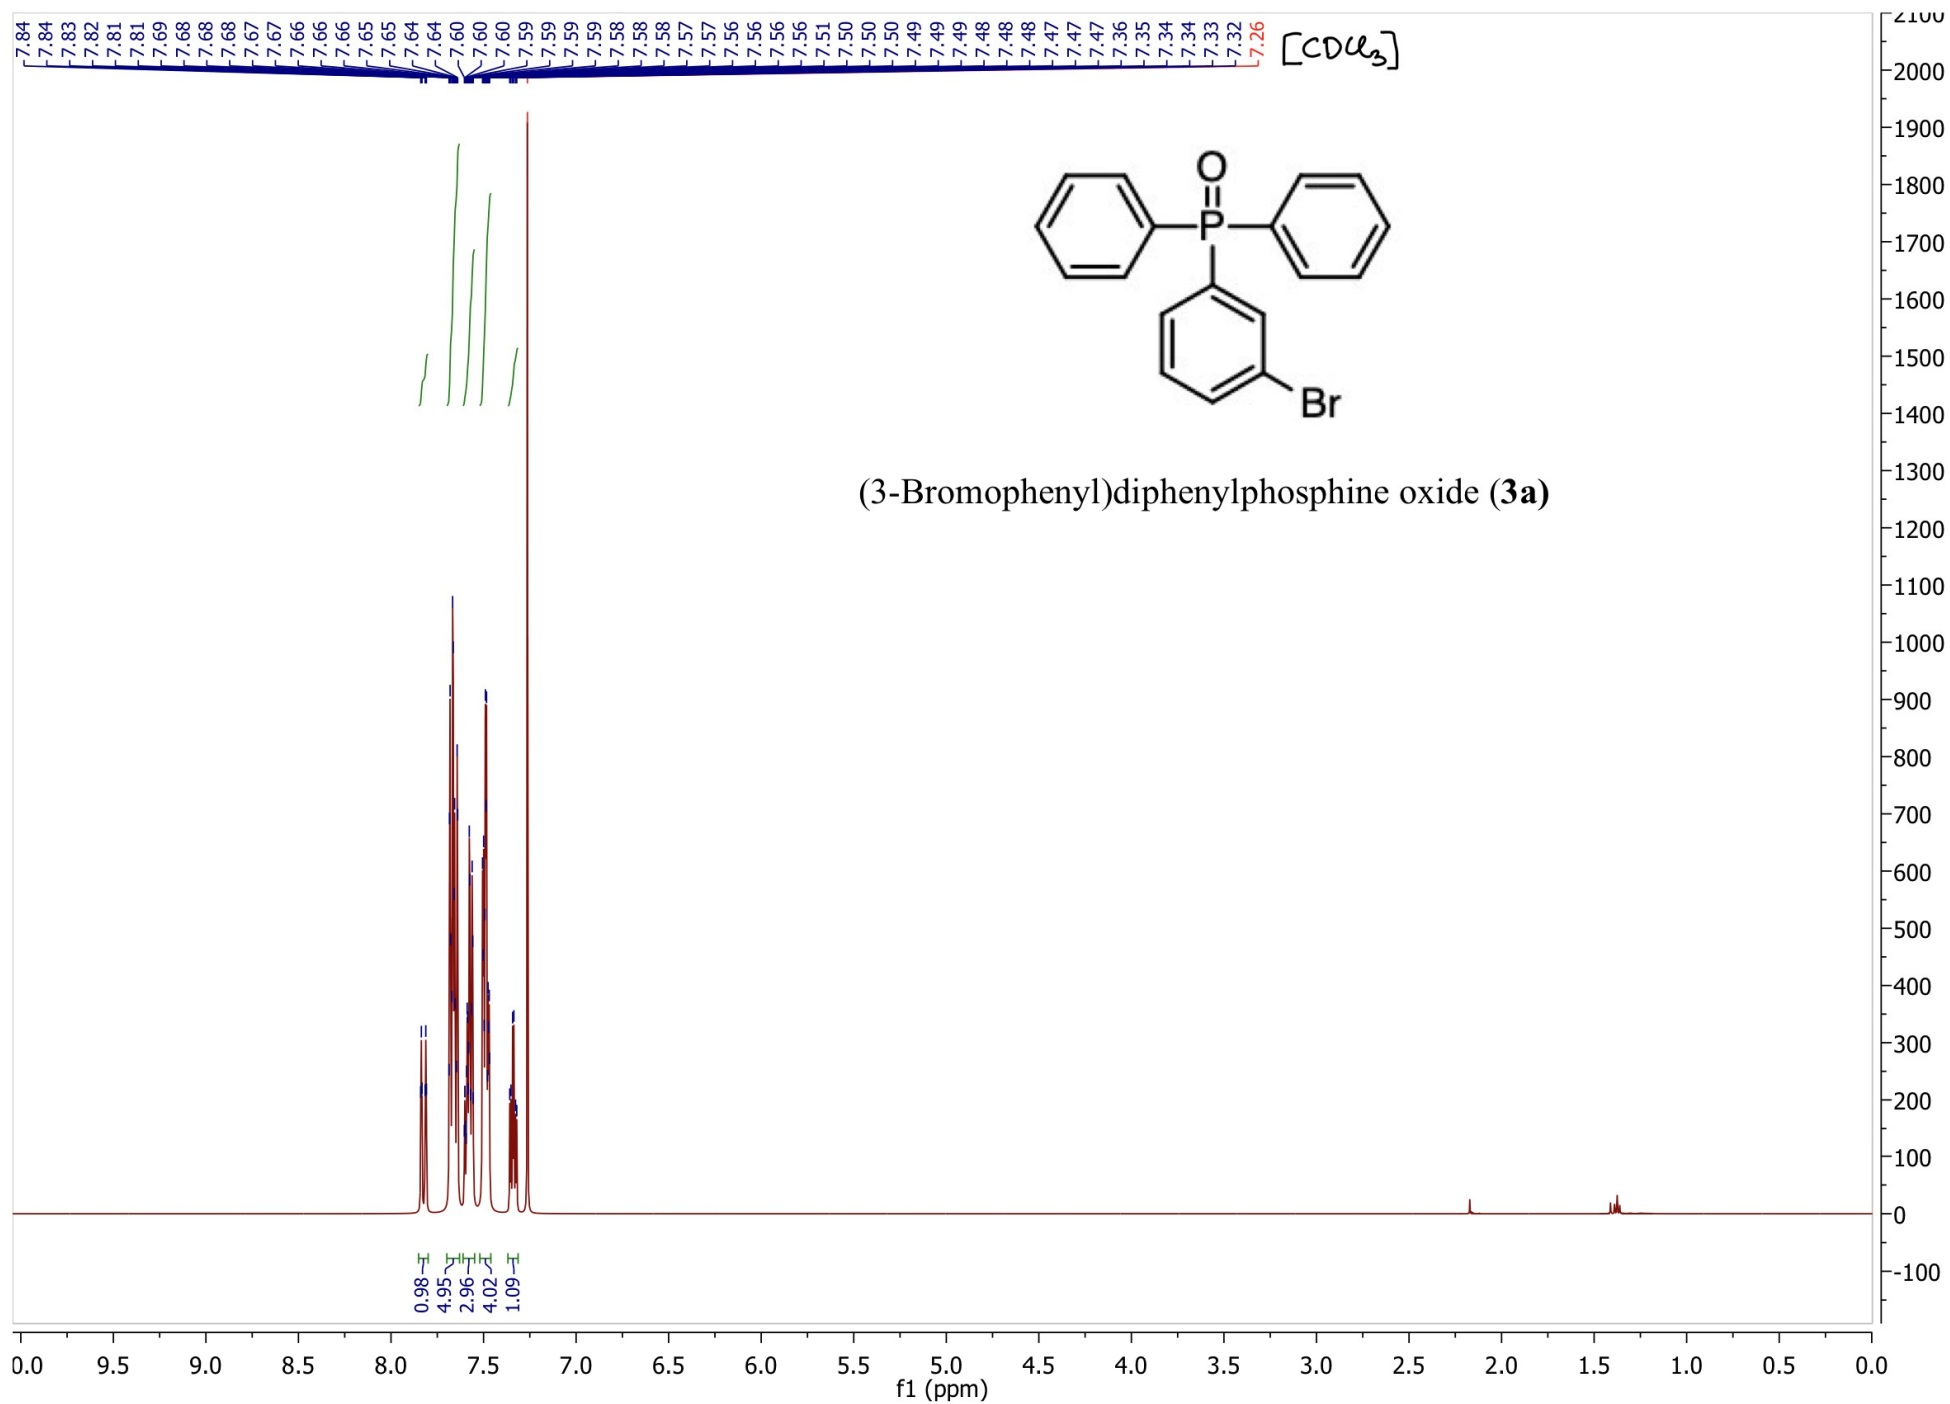

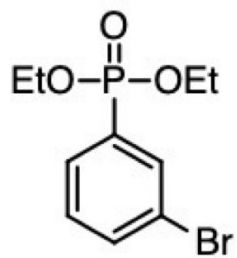

Diethyl 3-bromophenylphosphonate (**3b**)

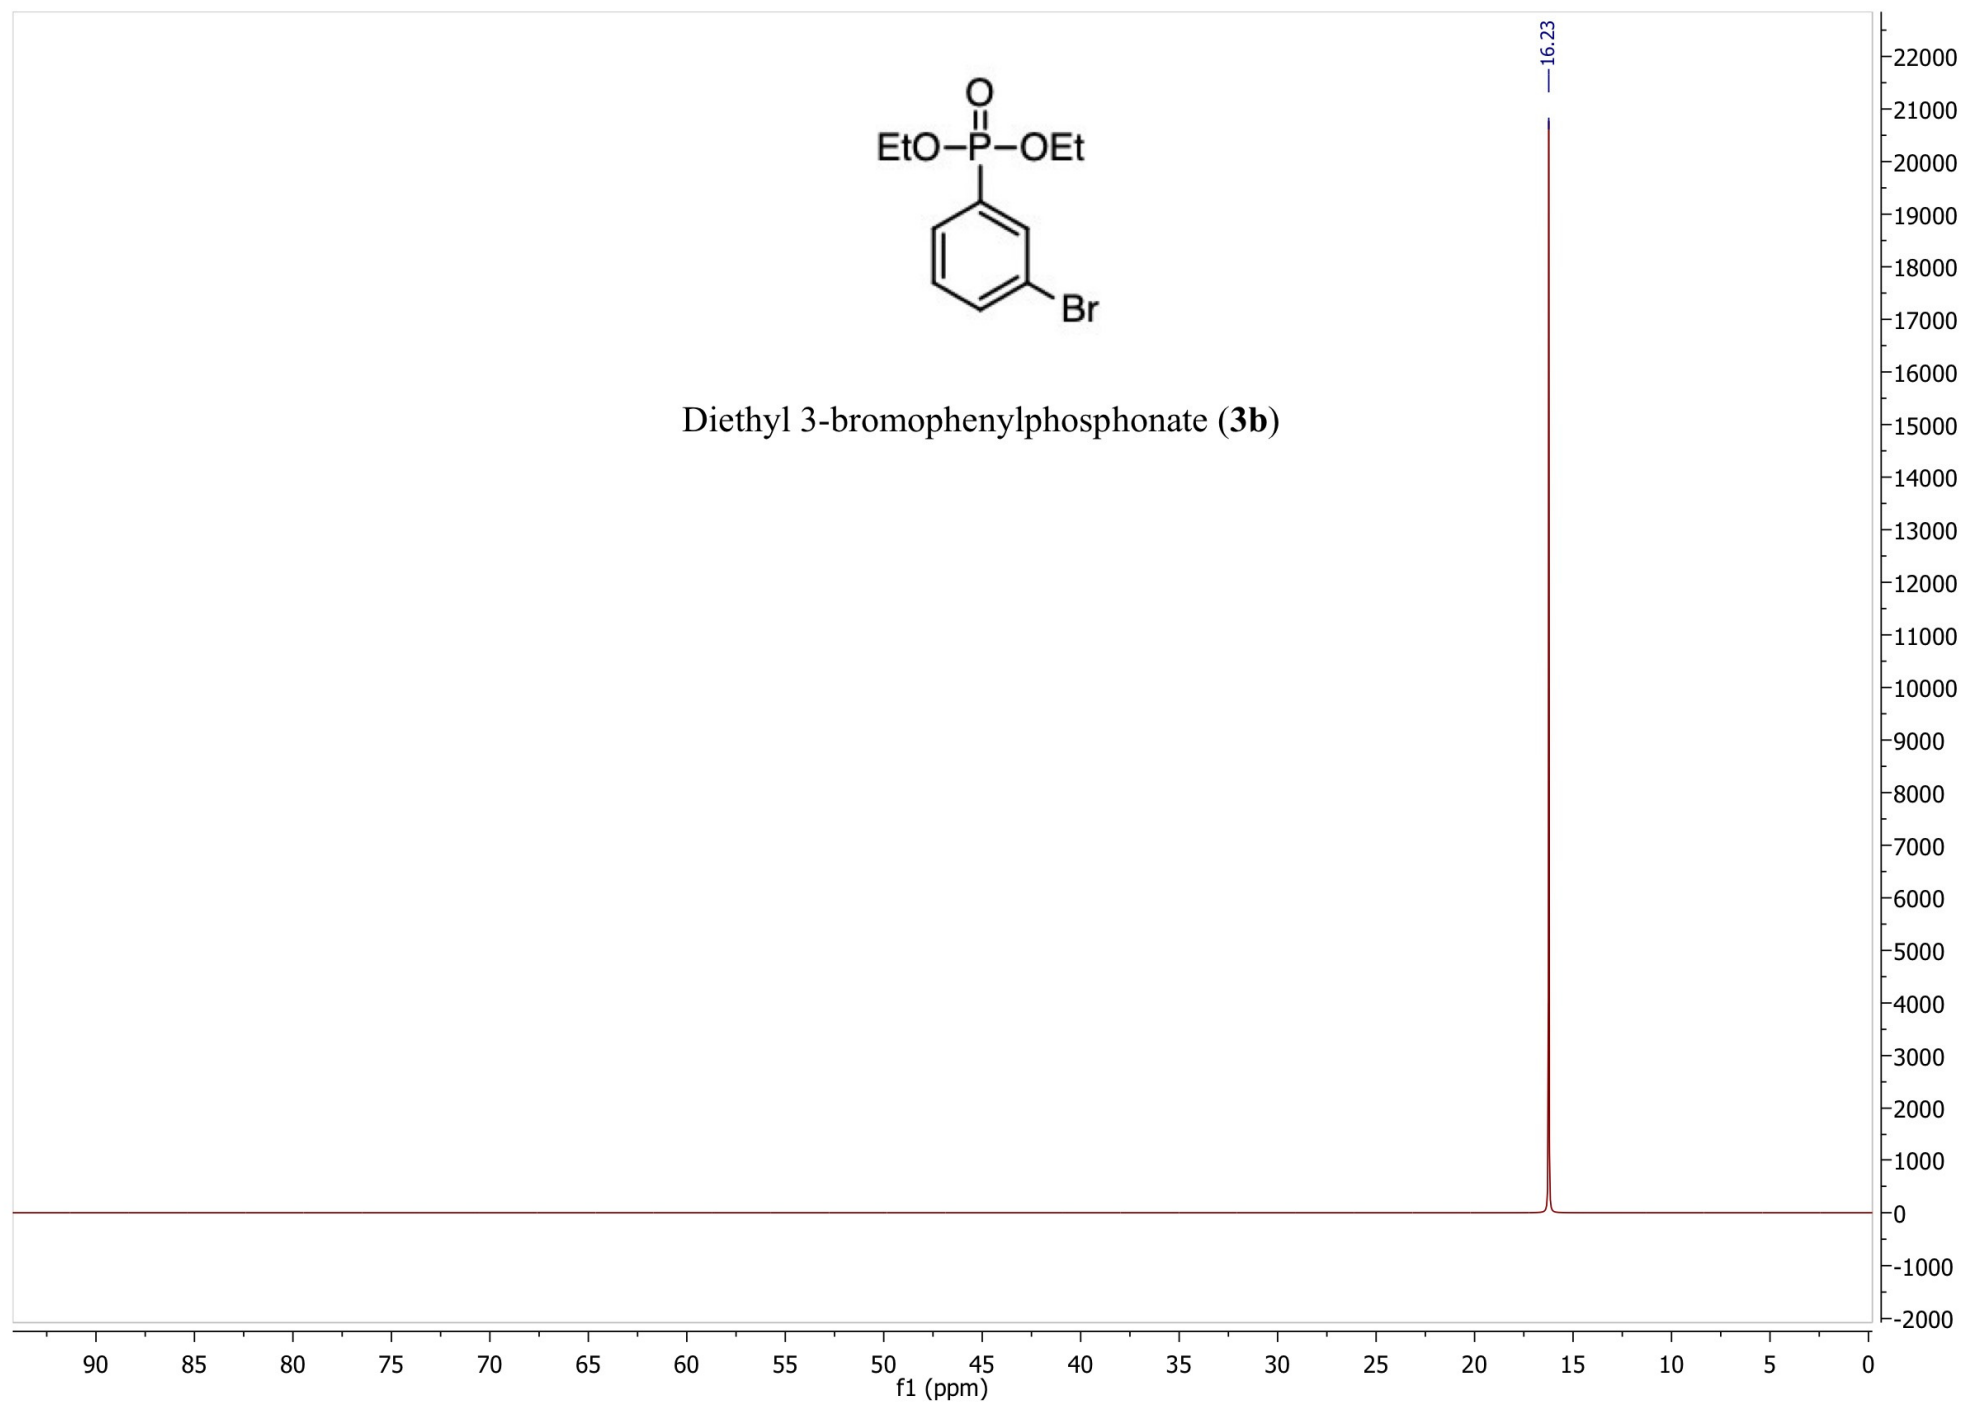

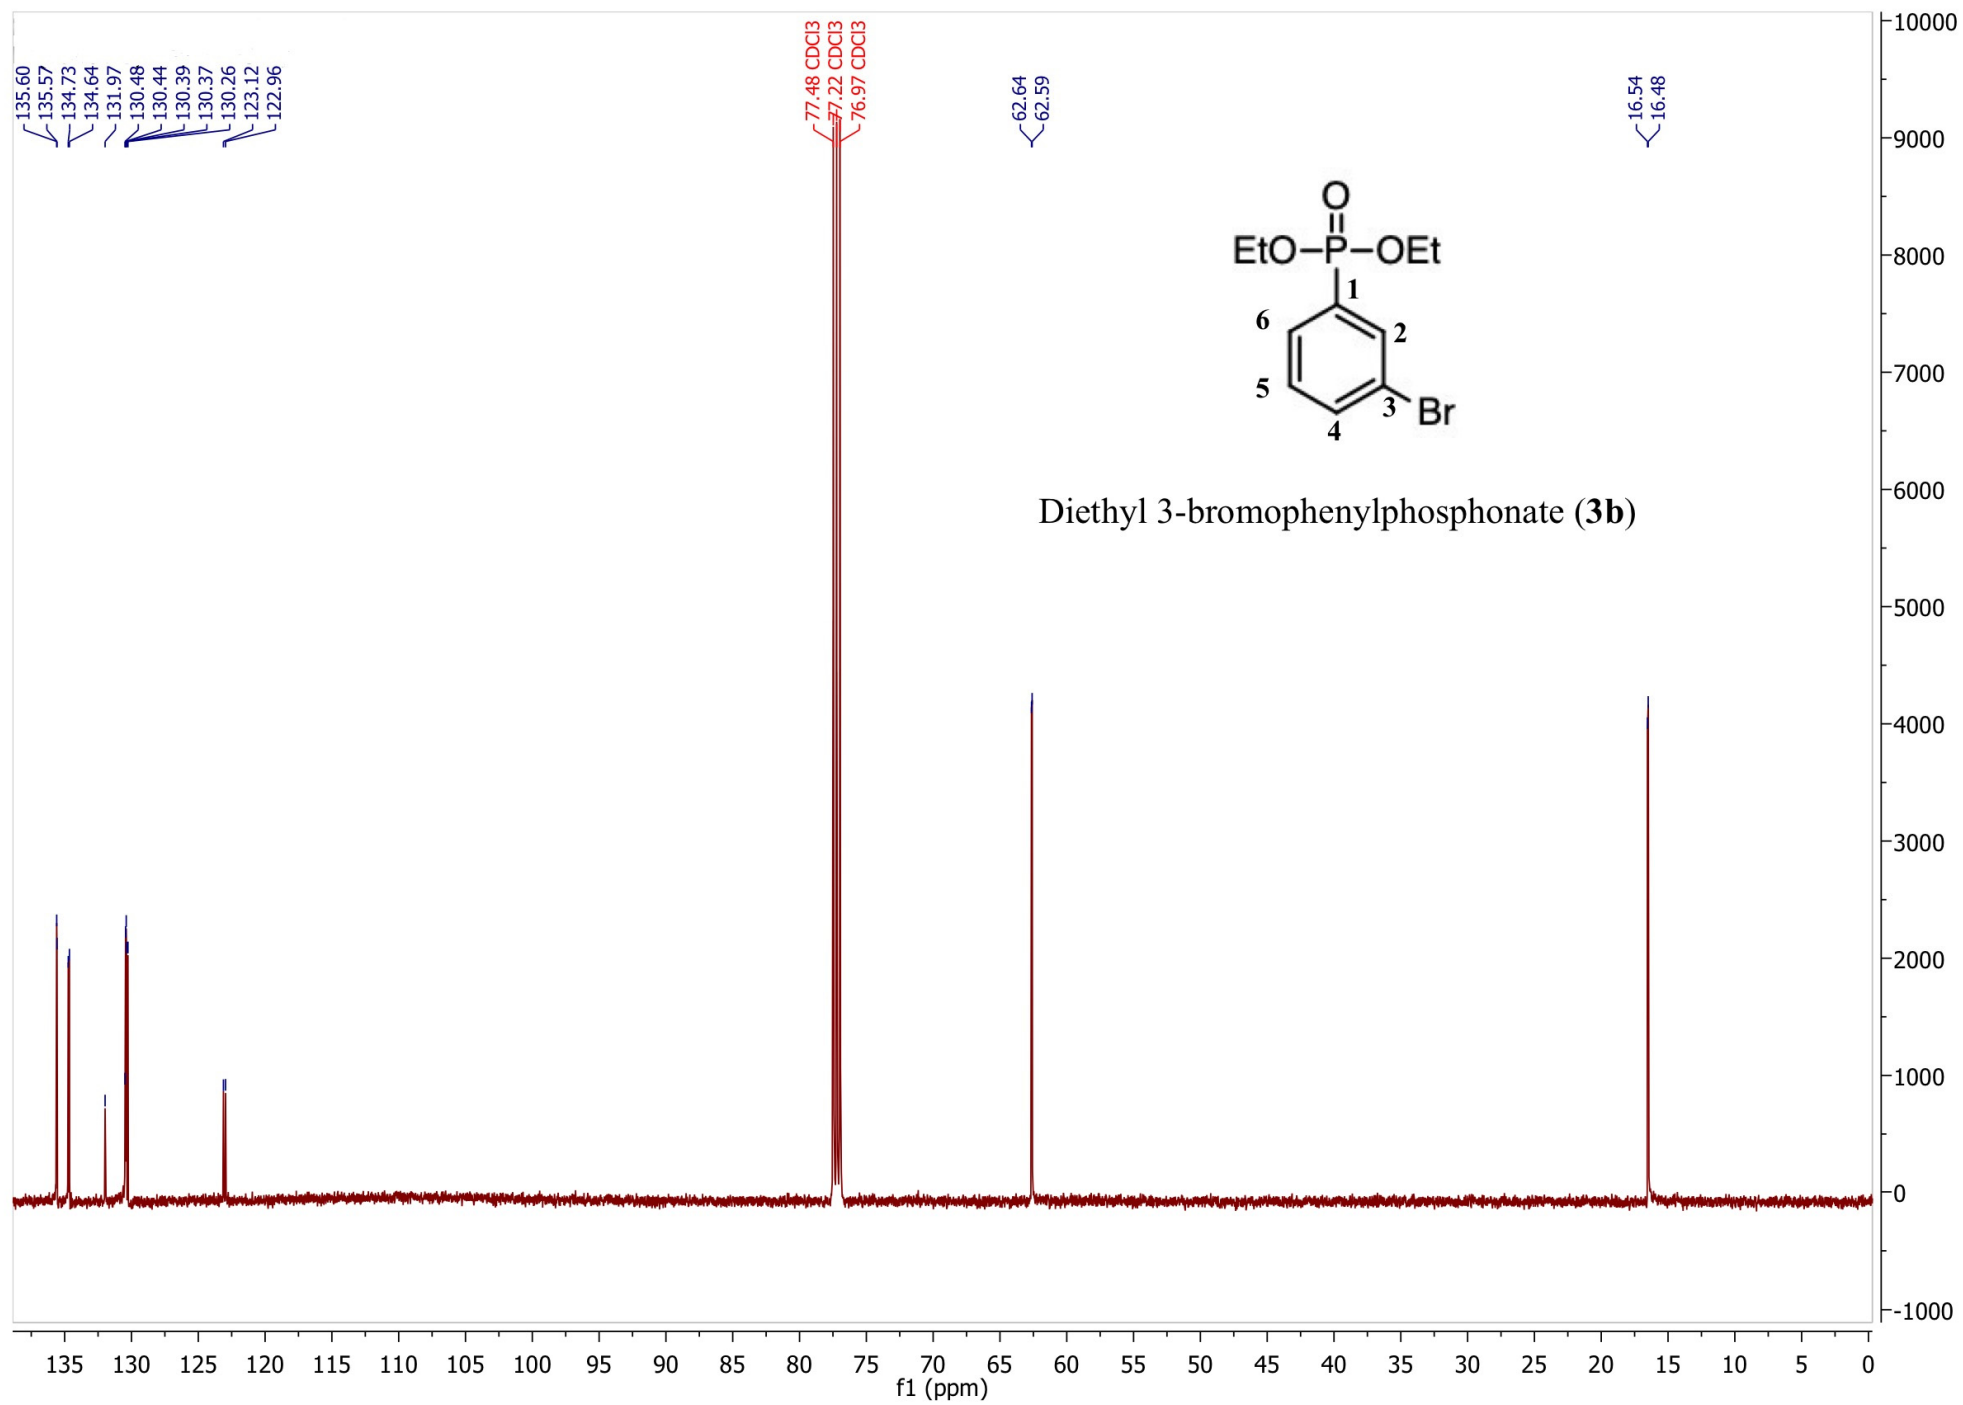

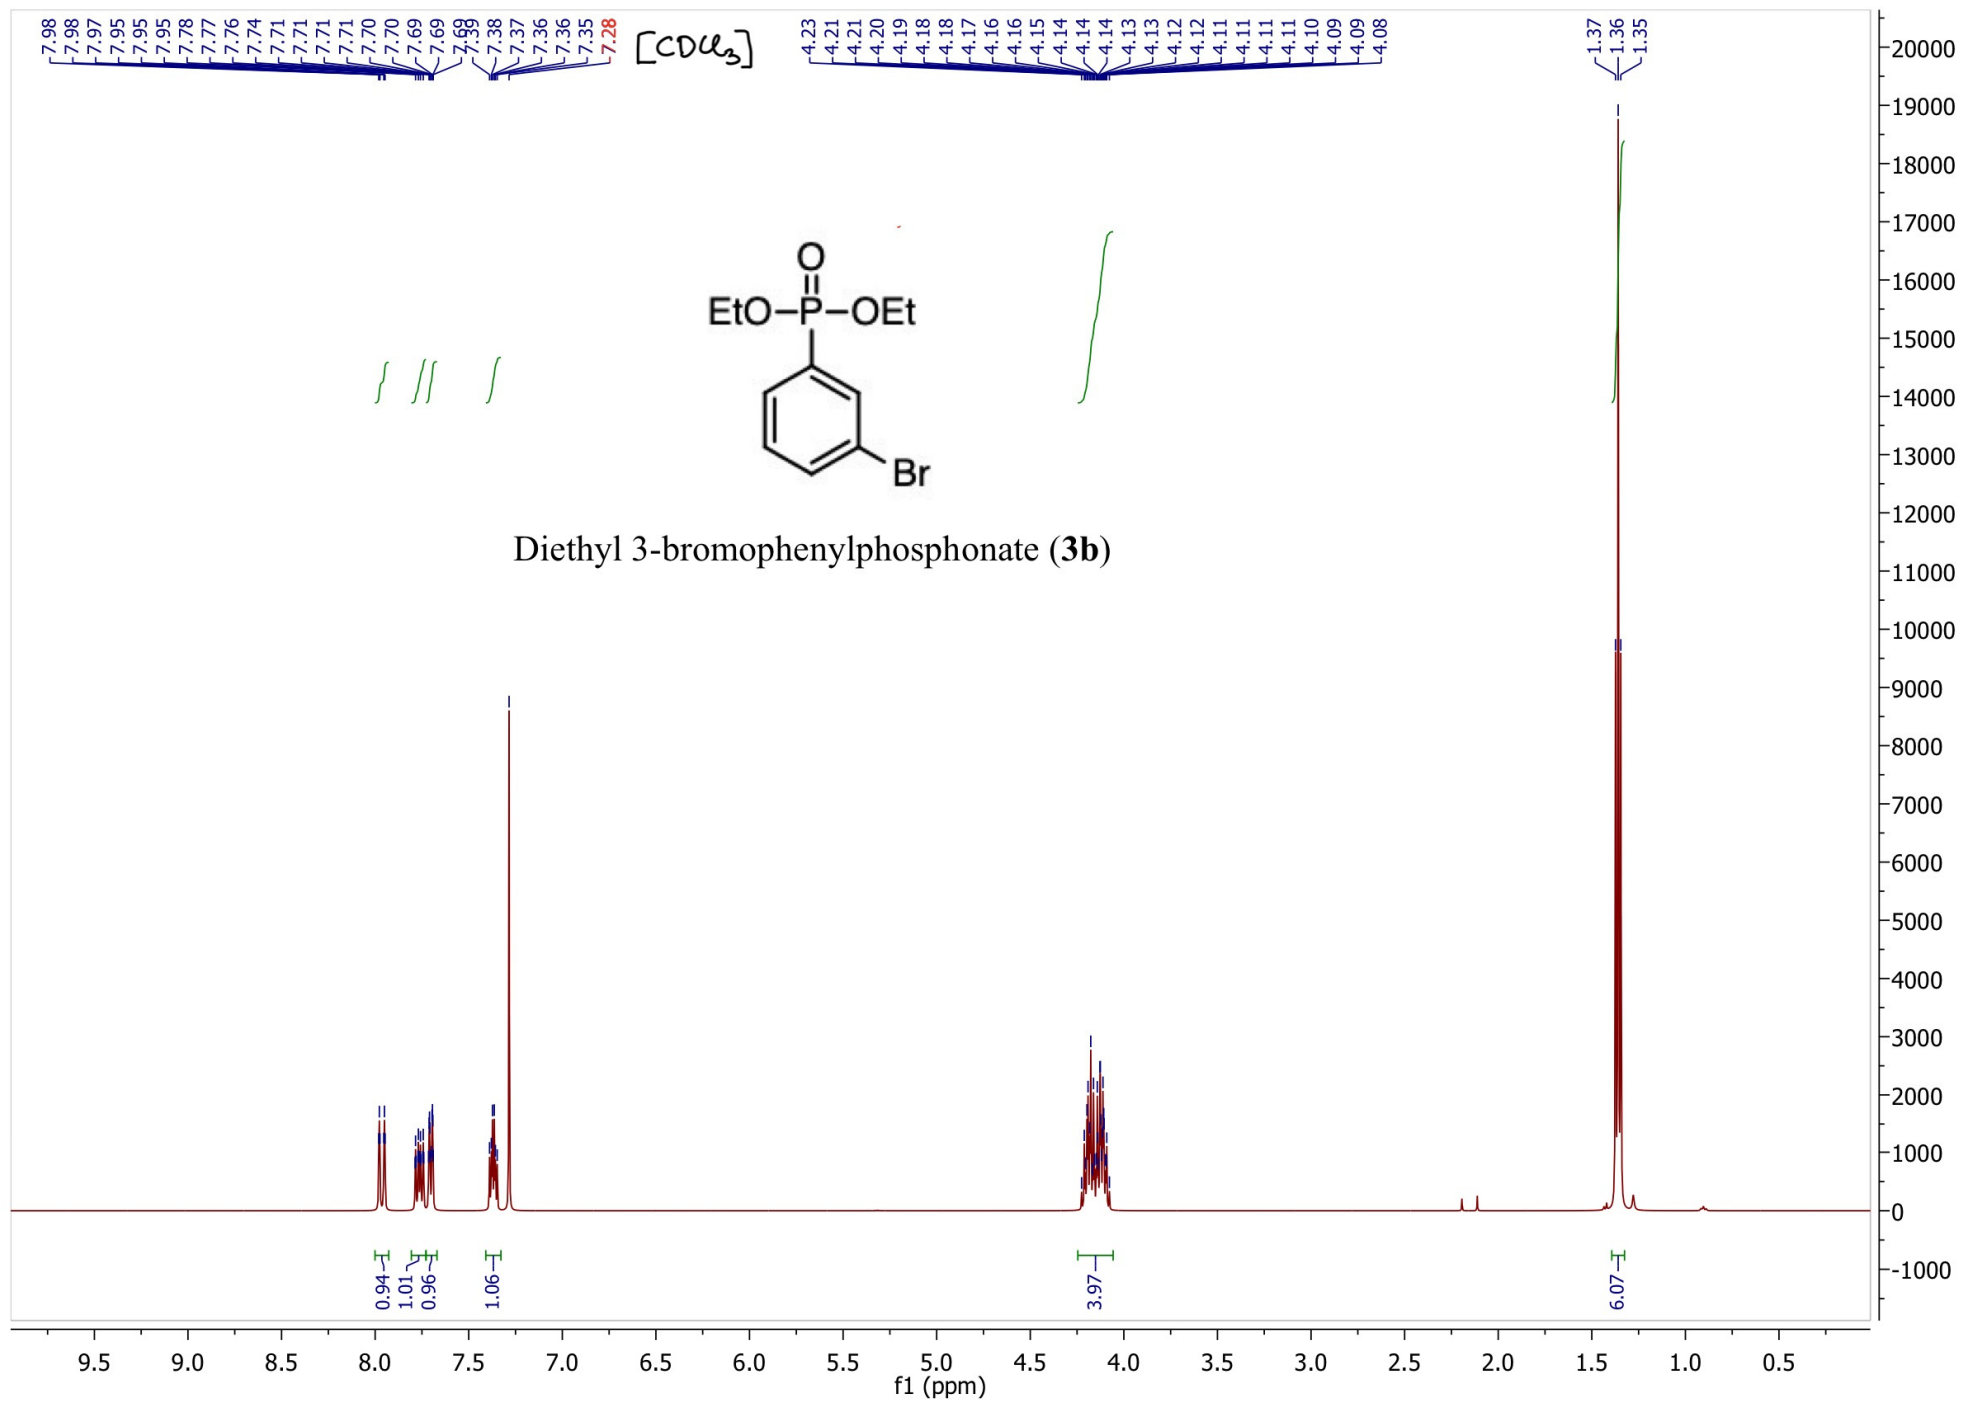

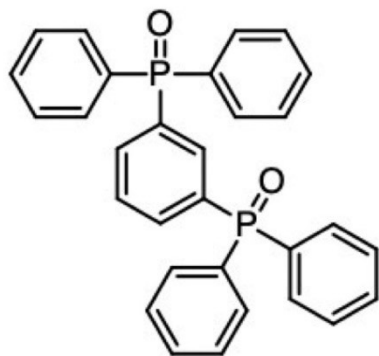

(1,3-Phenylenebis(diphenylphosphine oxide) (**4a**)

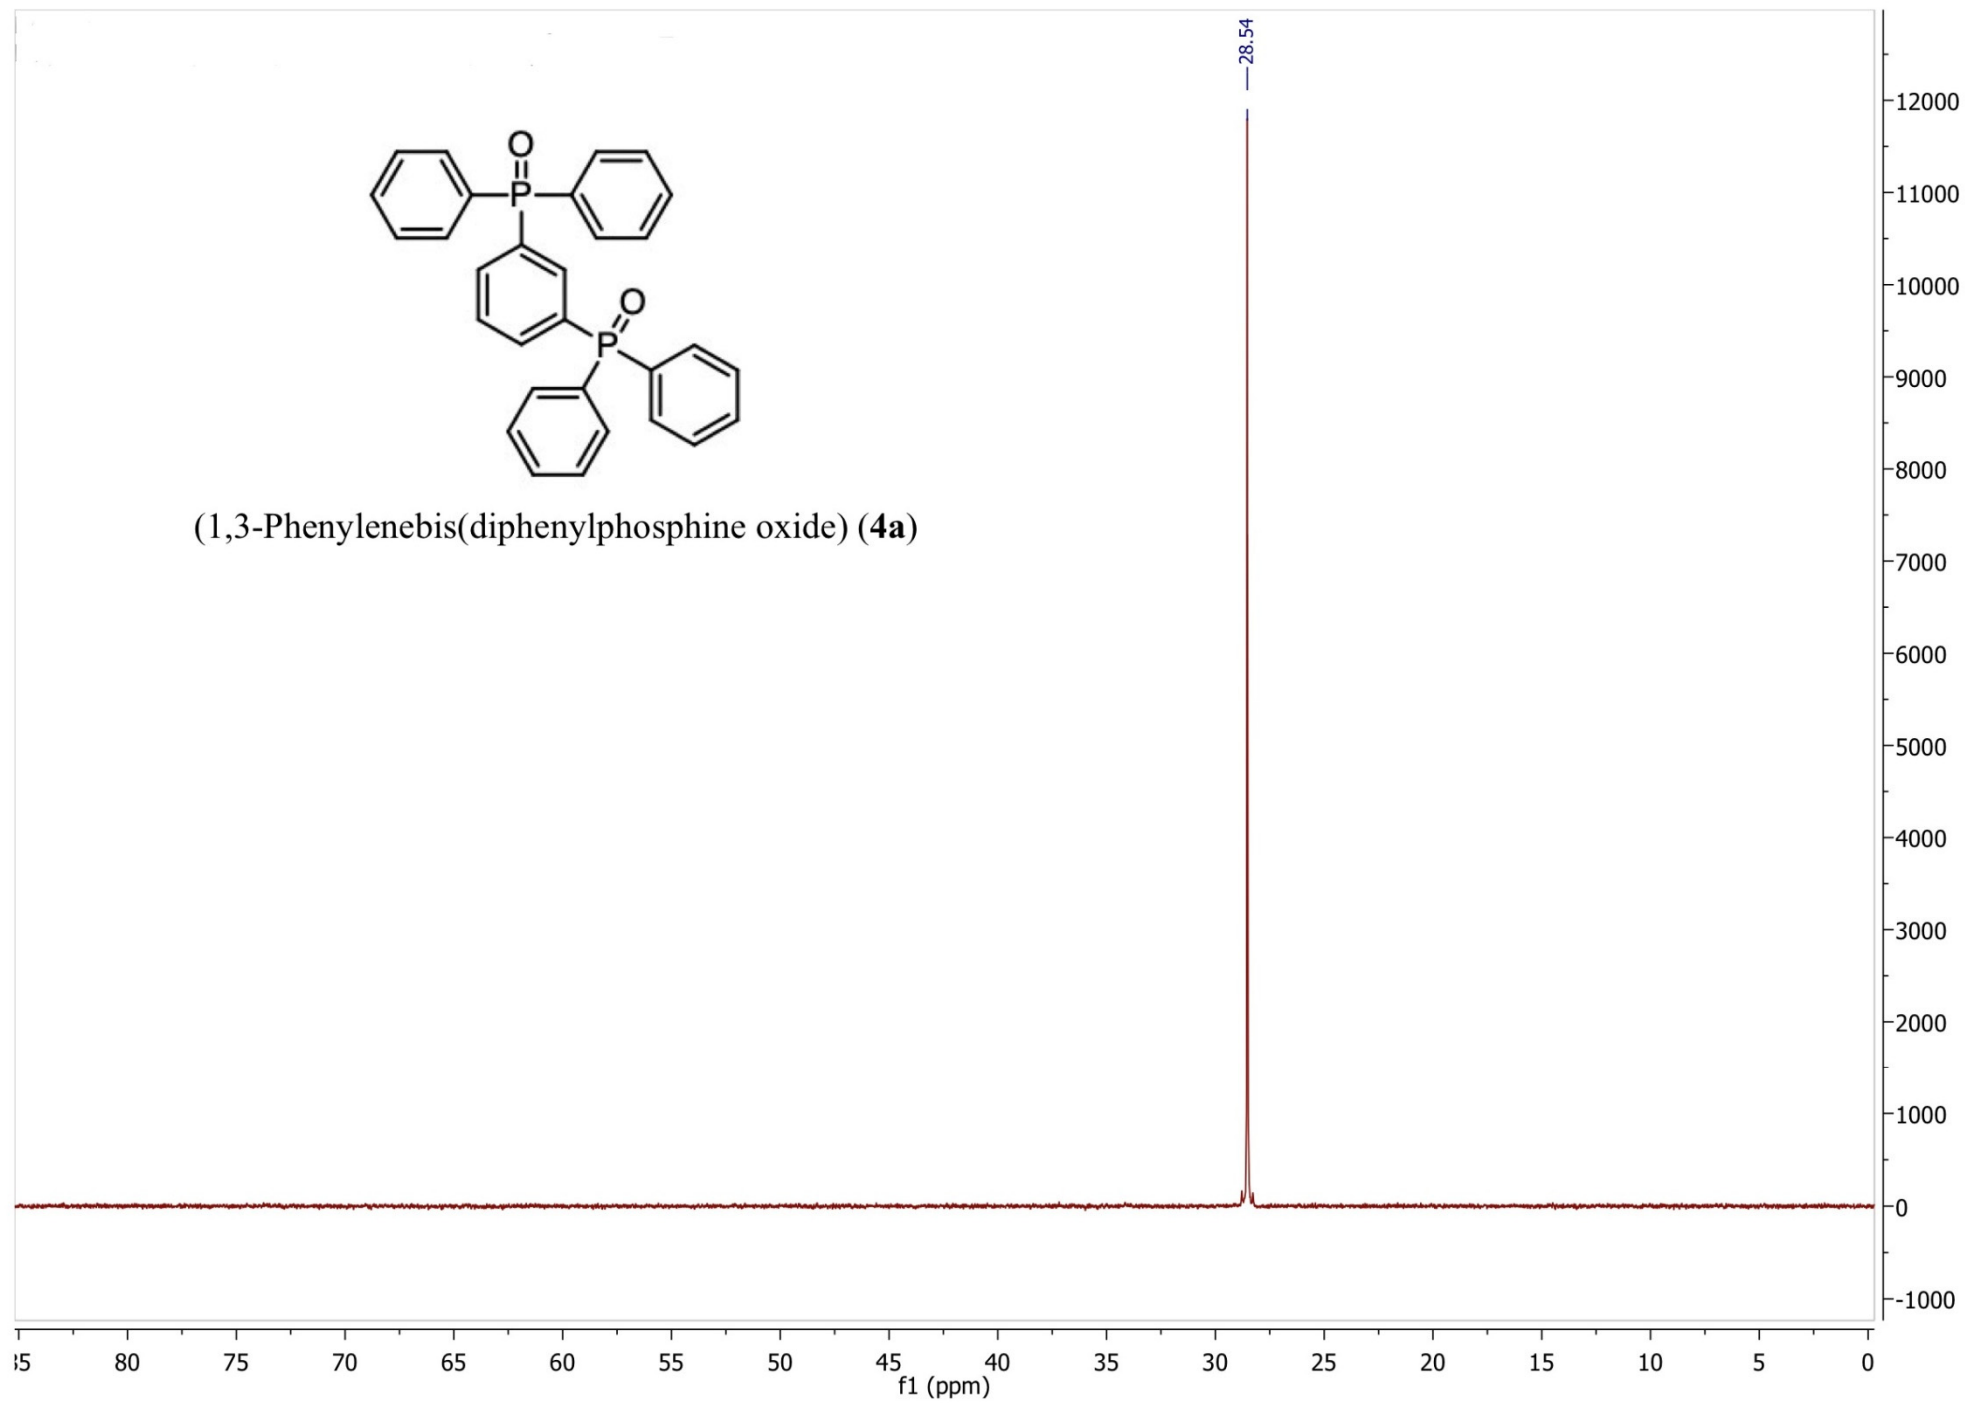

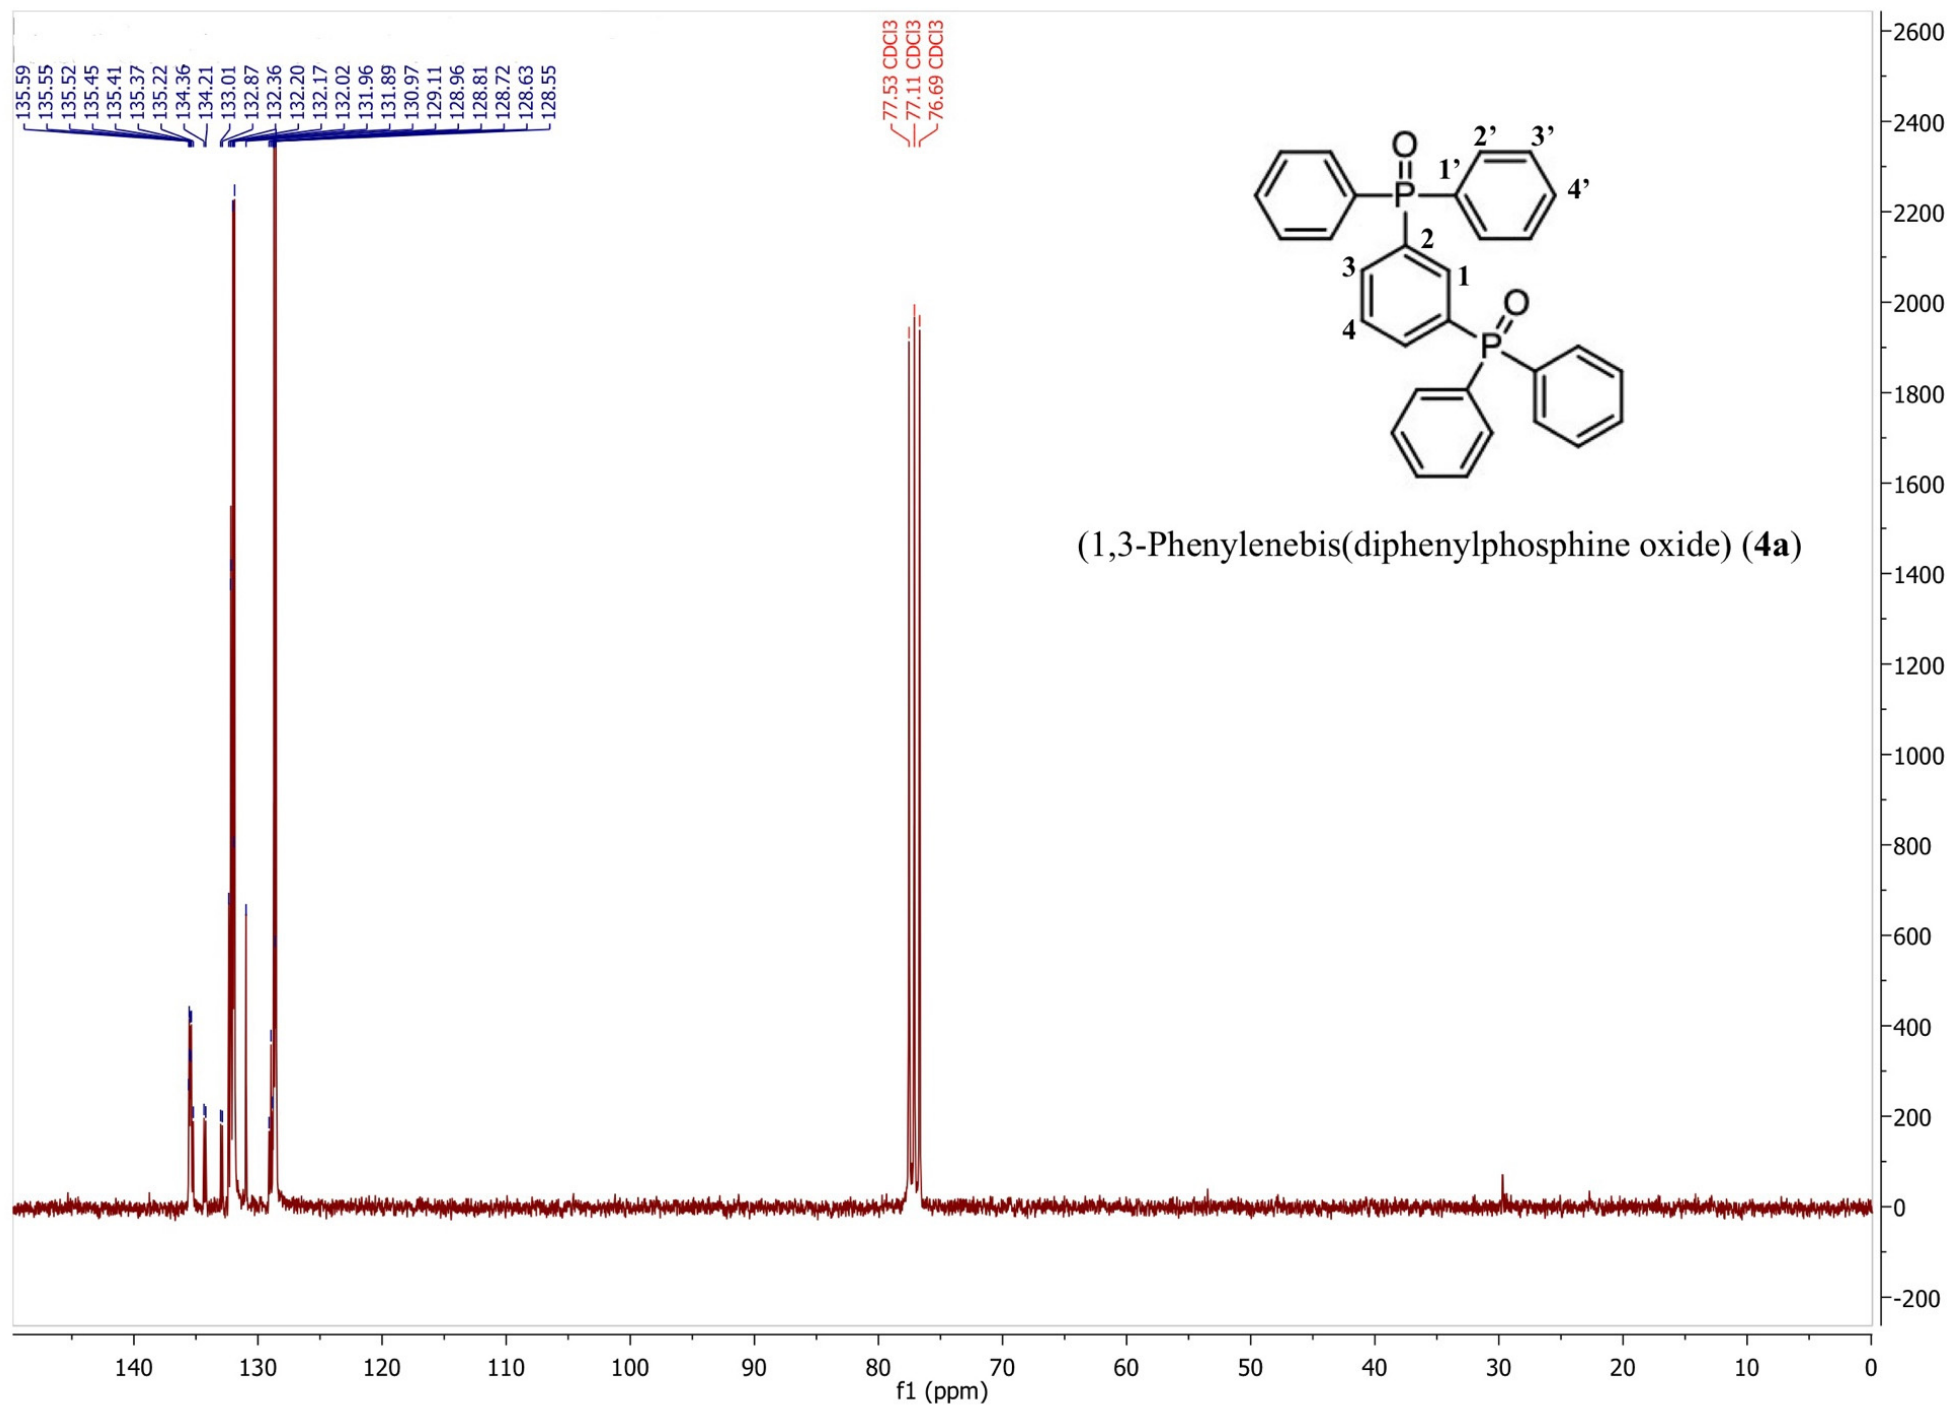

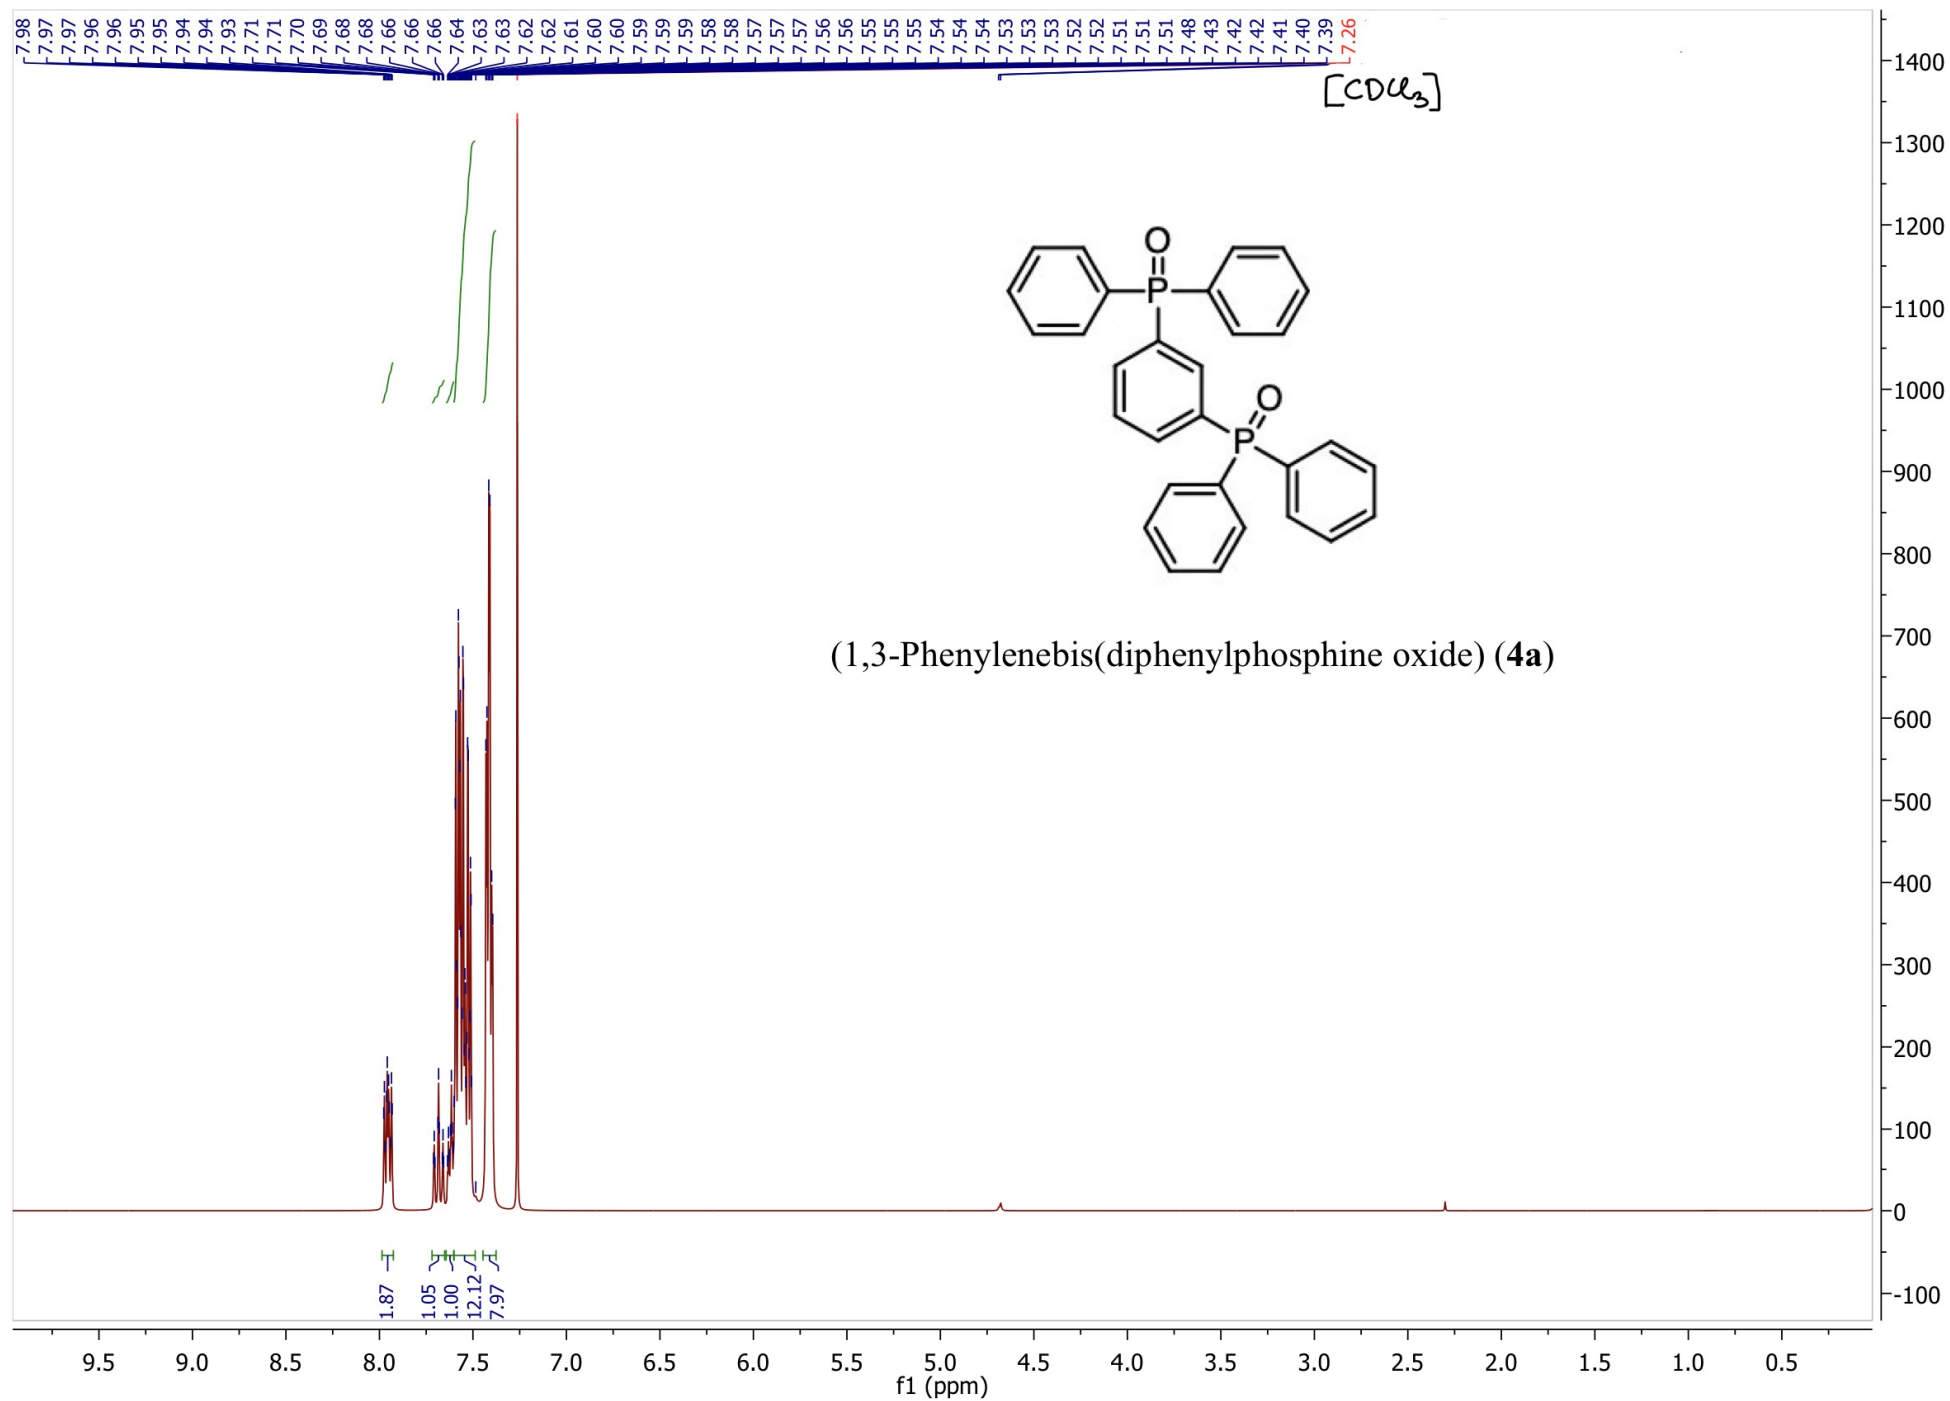

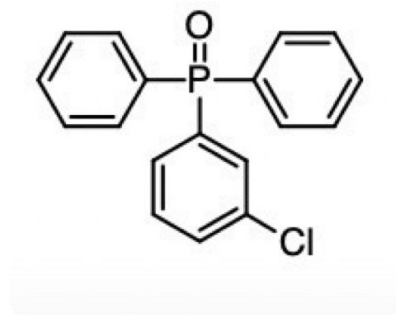

Diphenyl-3-chlorophenylphosphine oxide (**5a**)

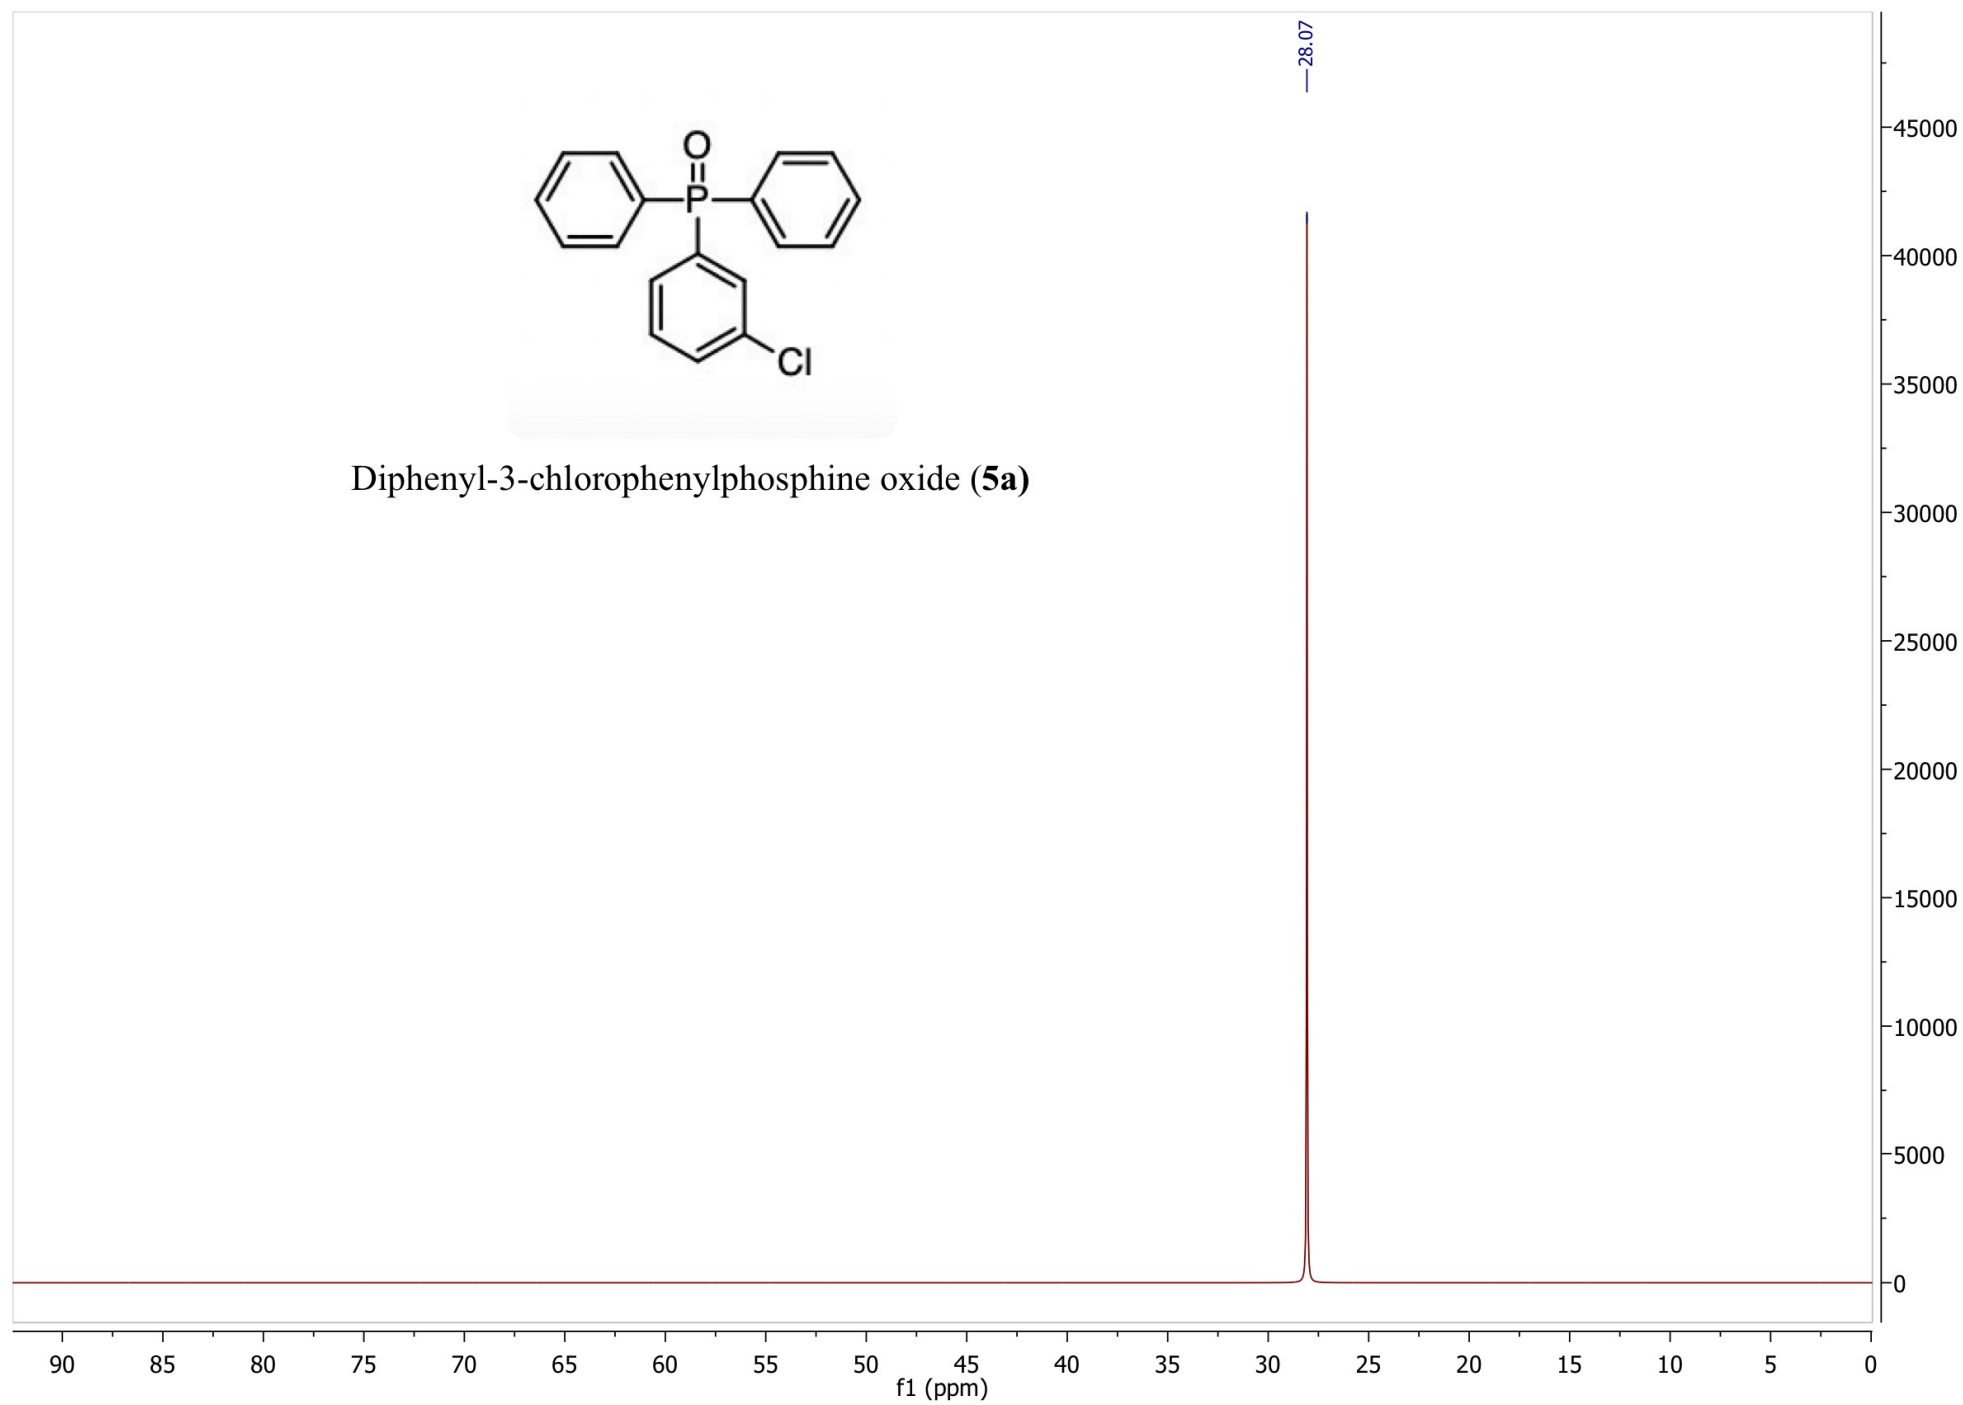



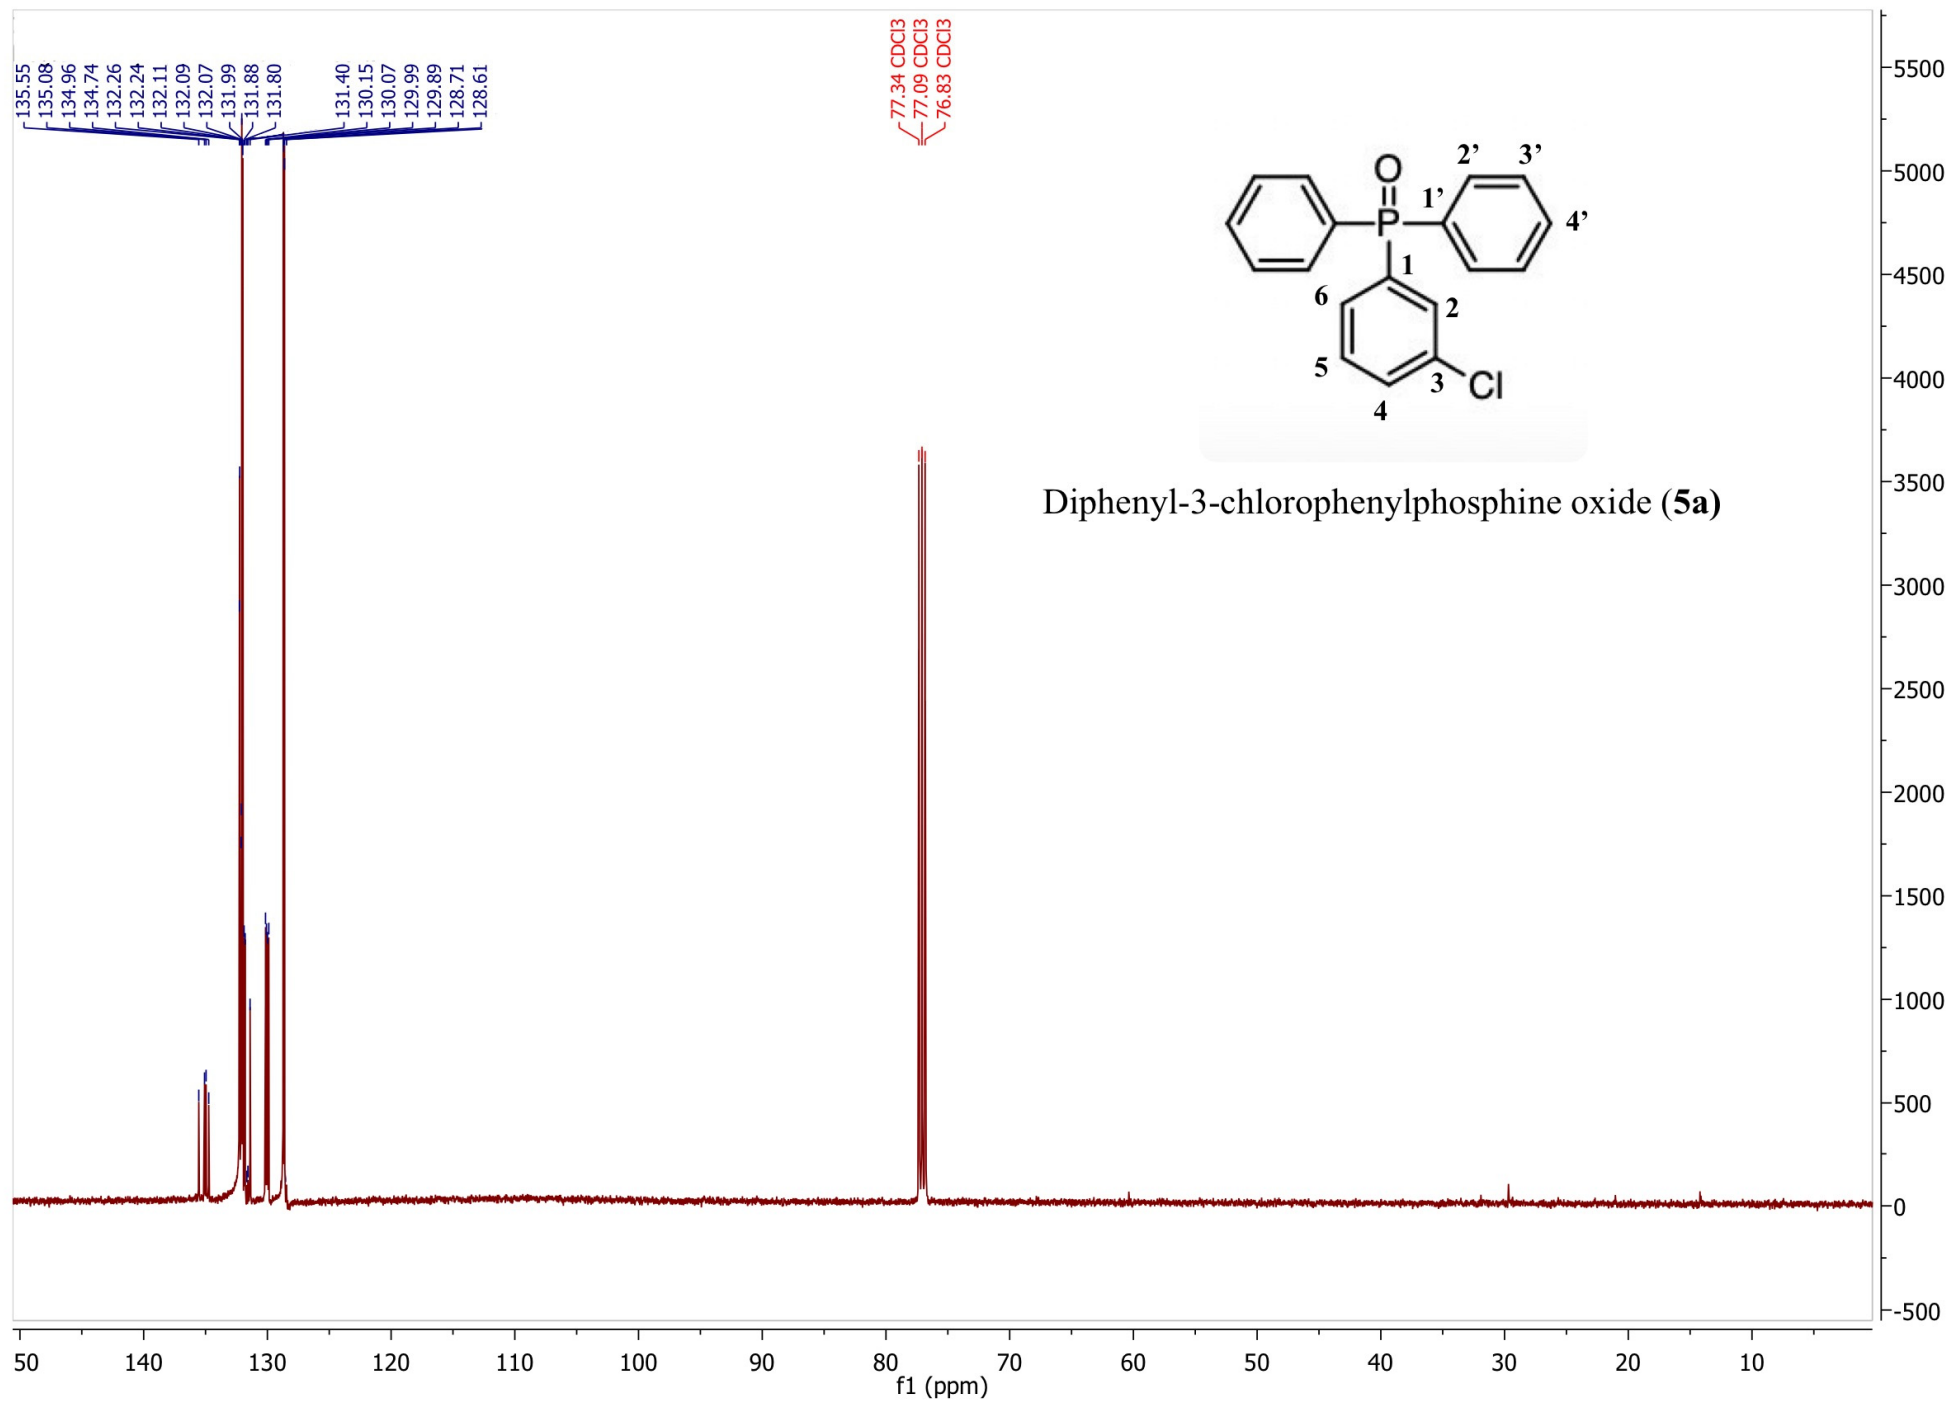

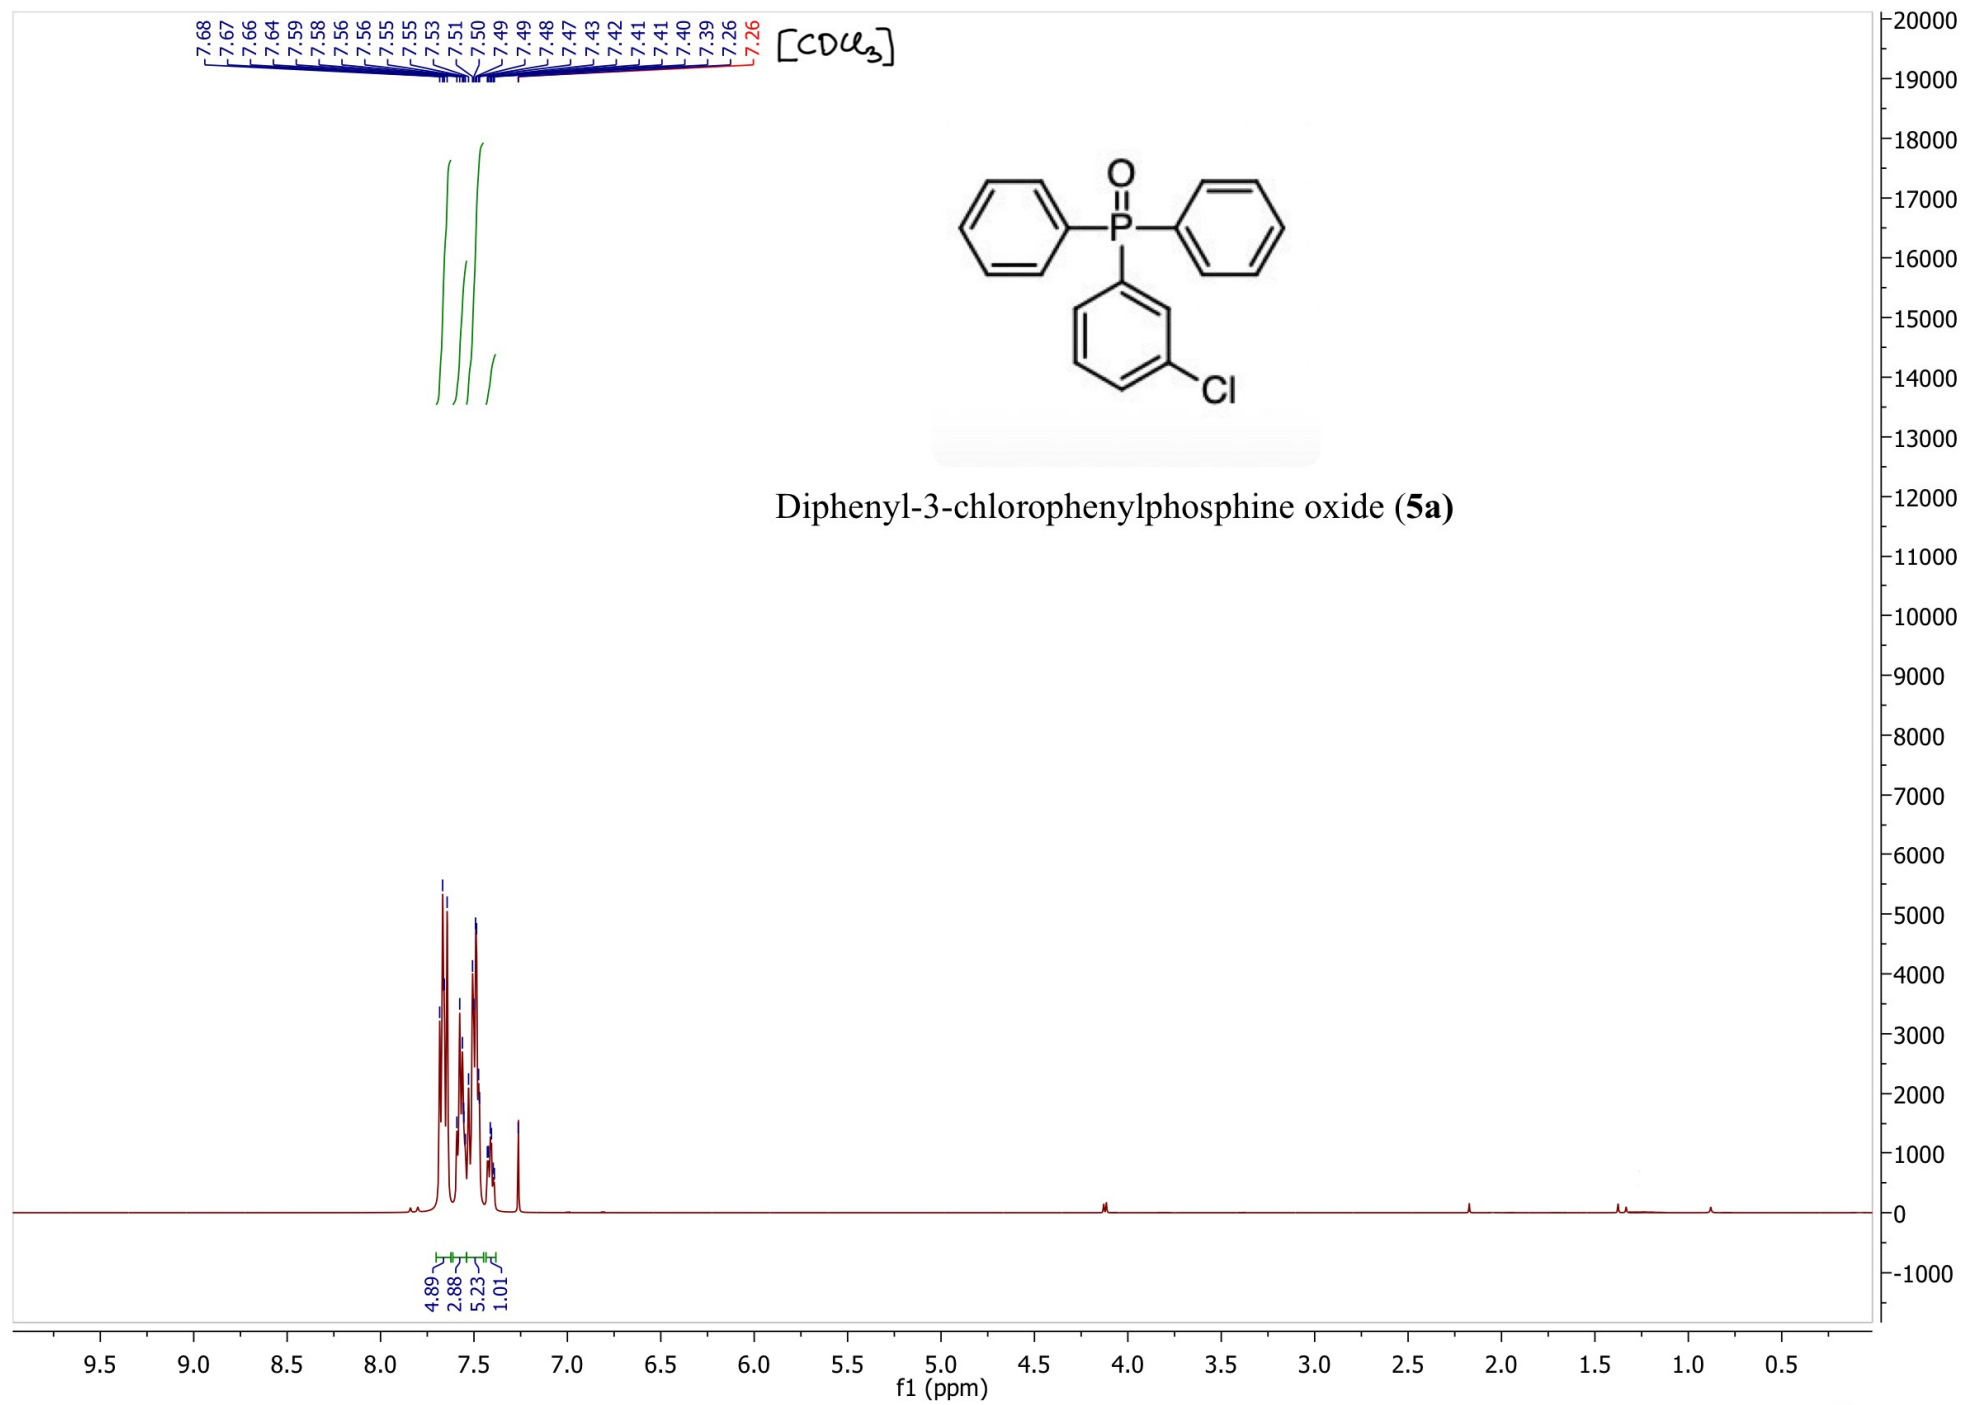

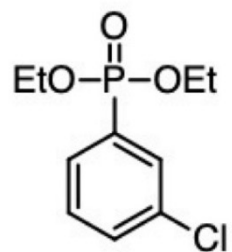

Diethyl 3-chlorophenylphosphonate (**5b**)

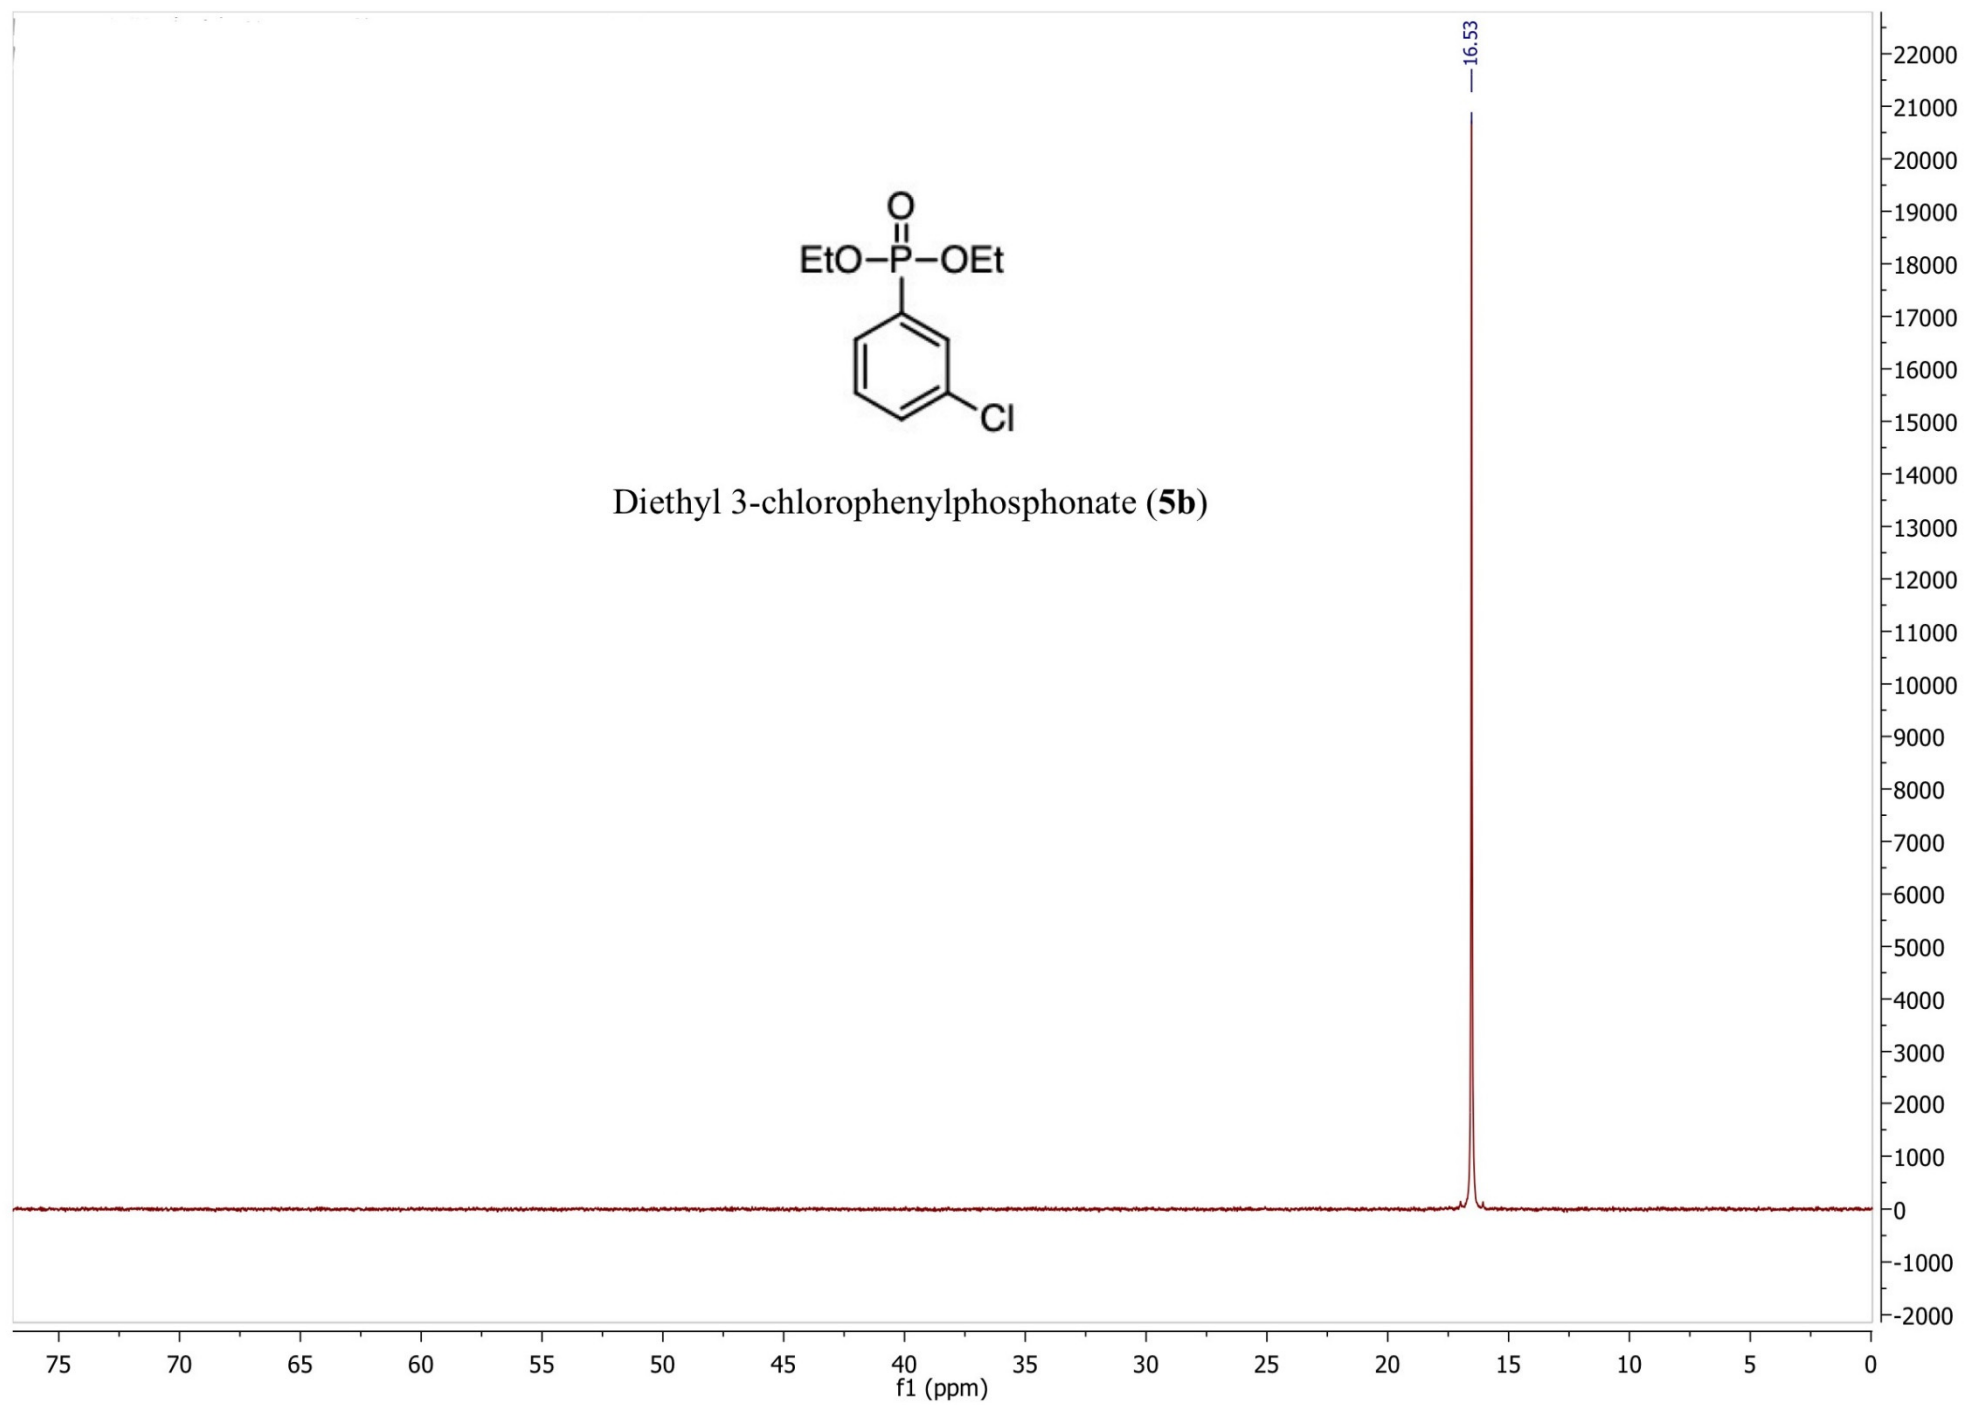

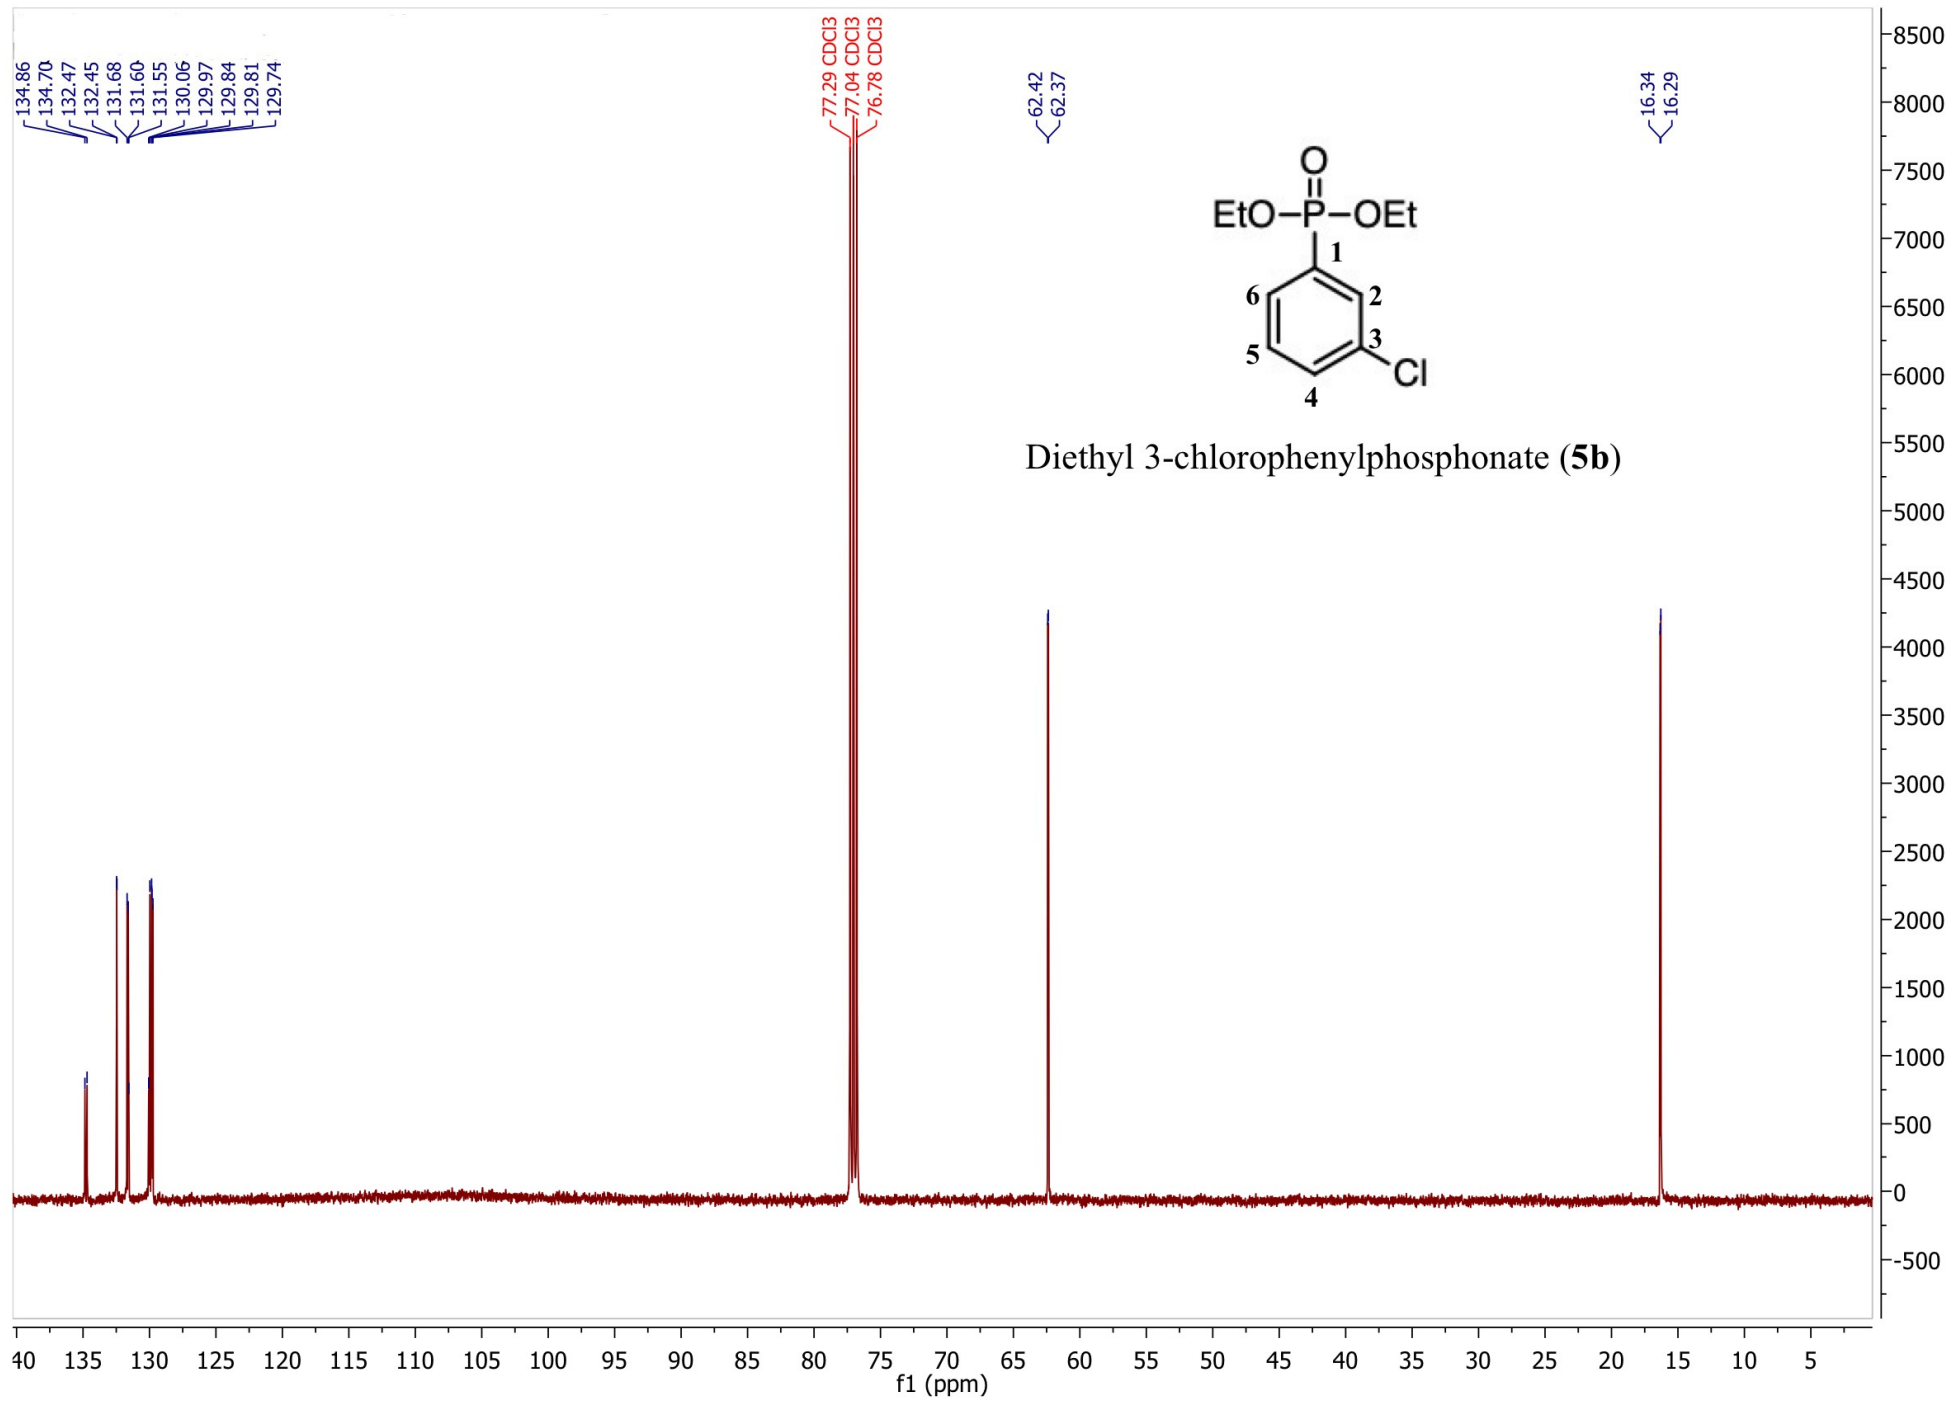

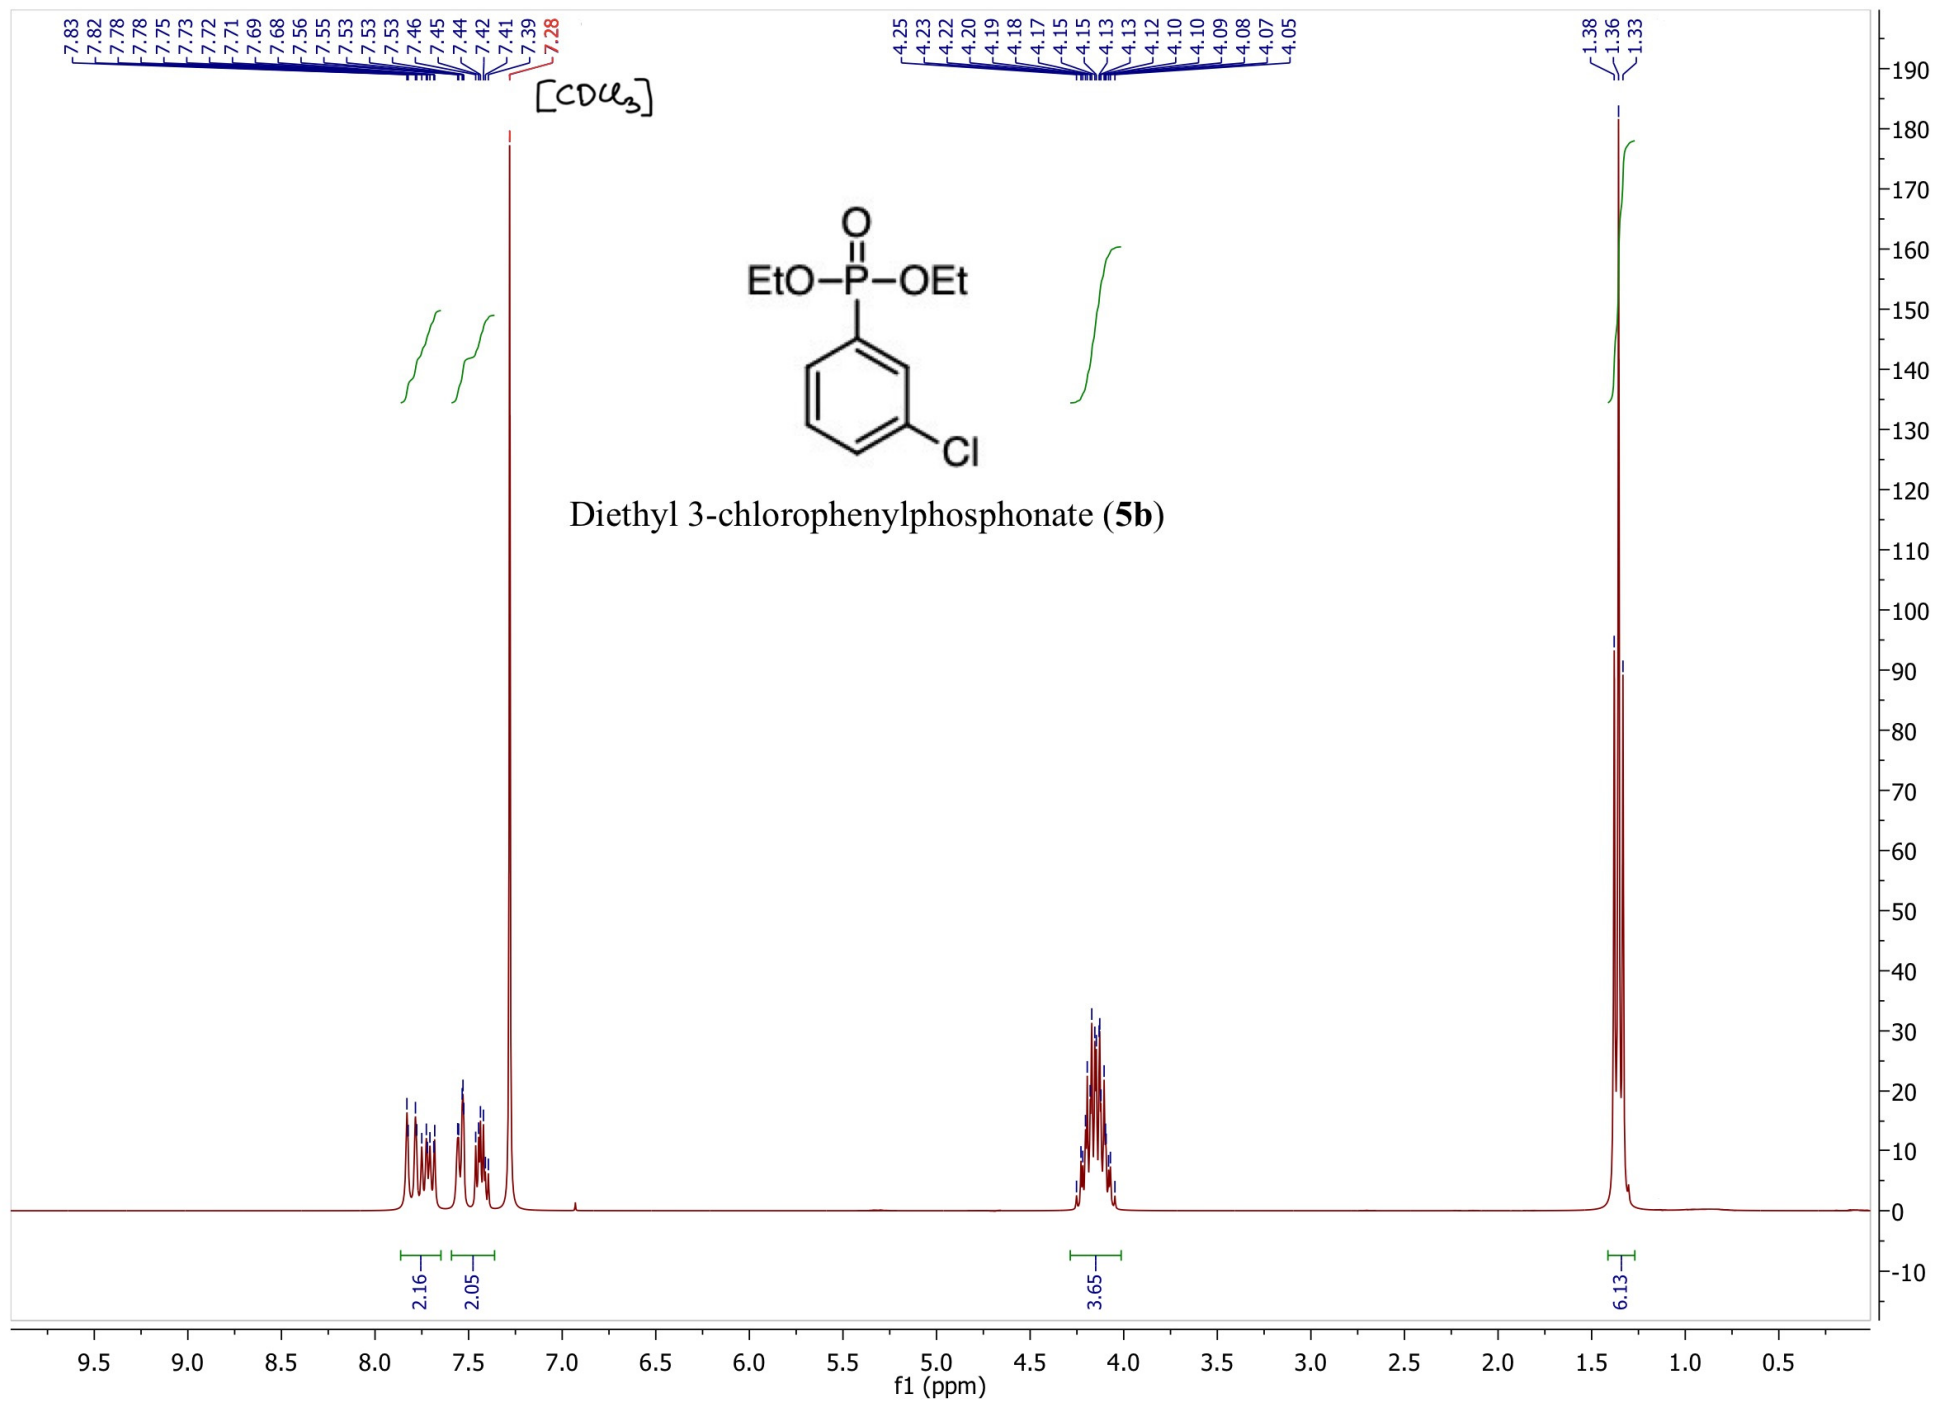

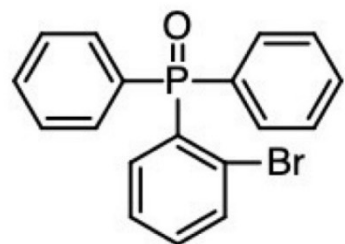

(2-Bromophenyl)diphenylphosphine oxide (**6a**)

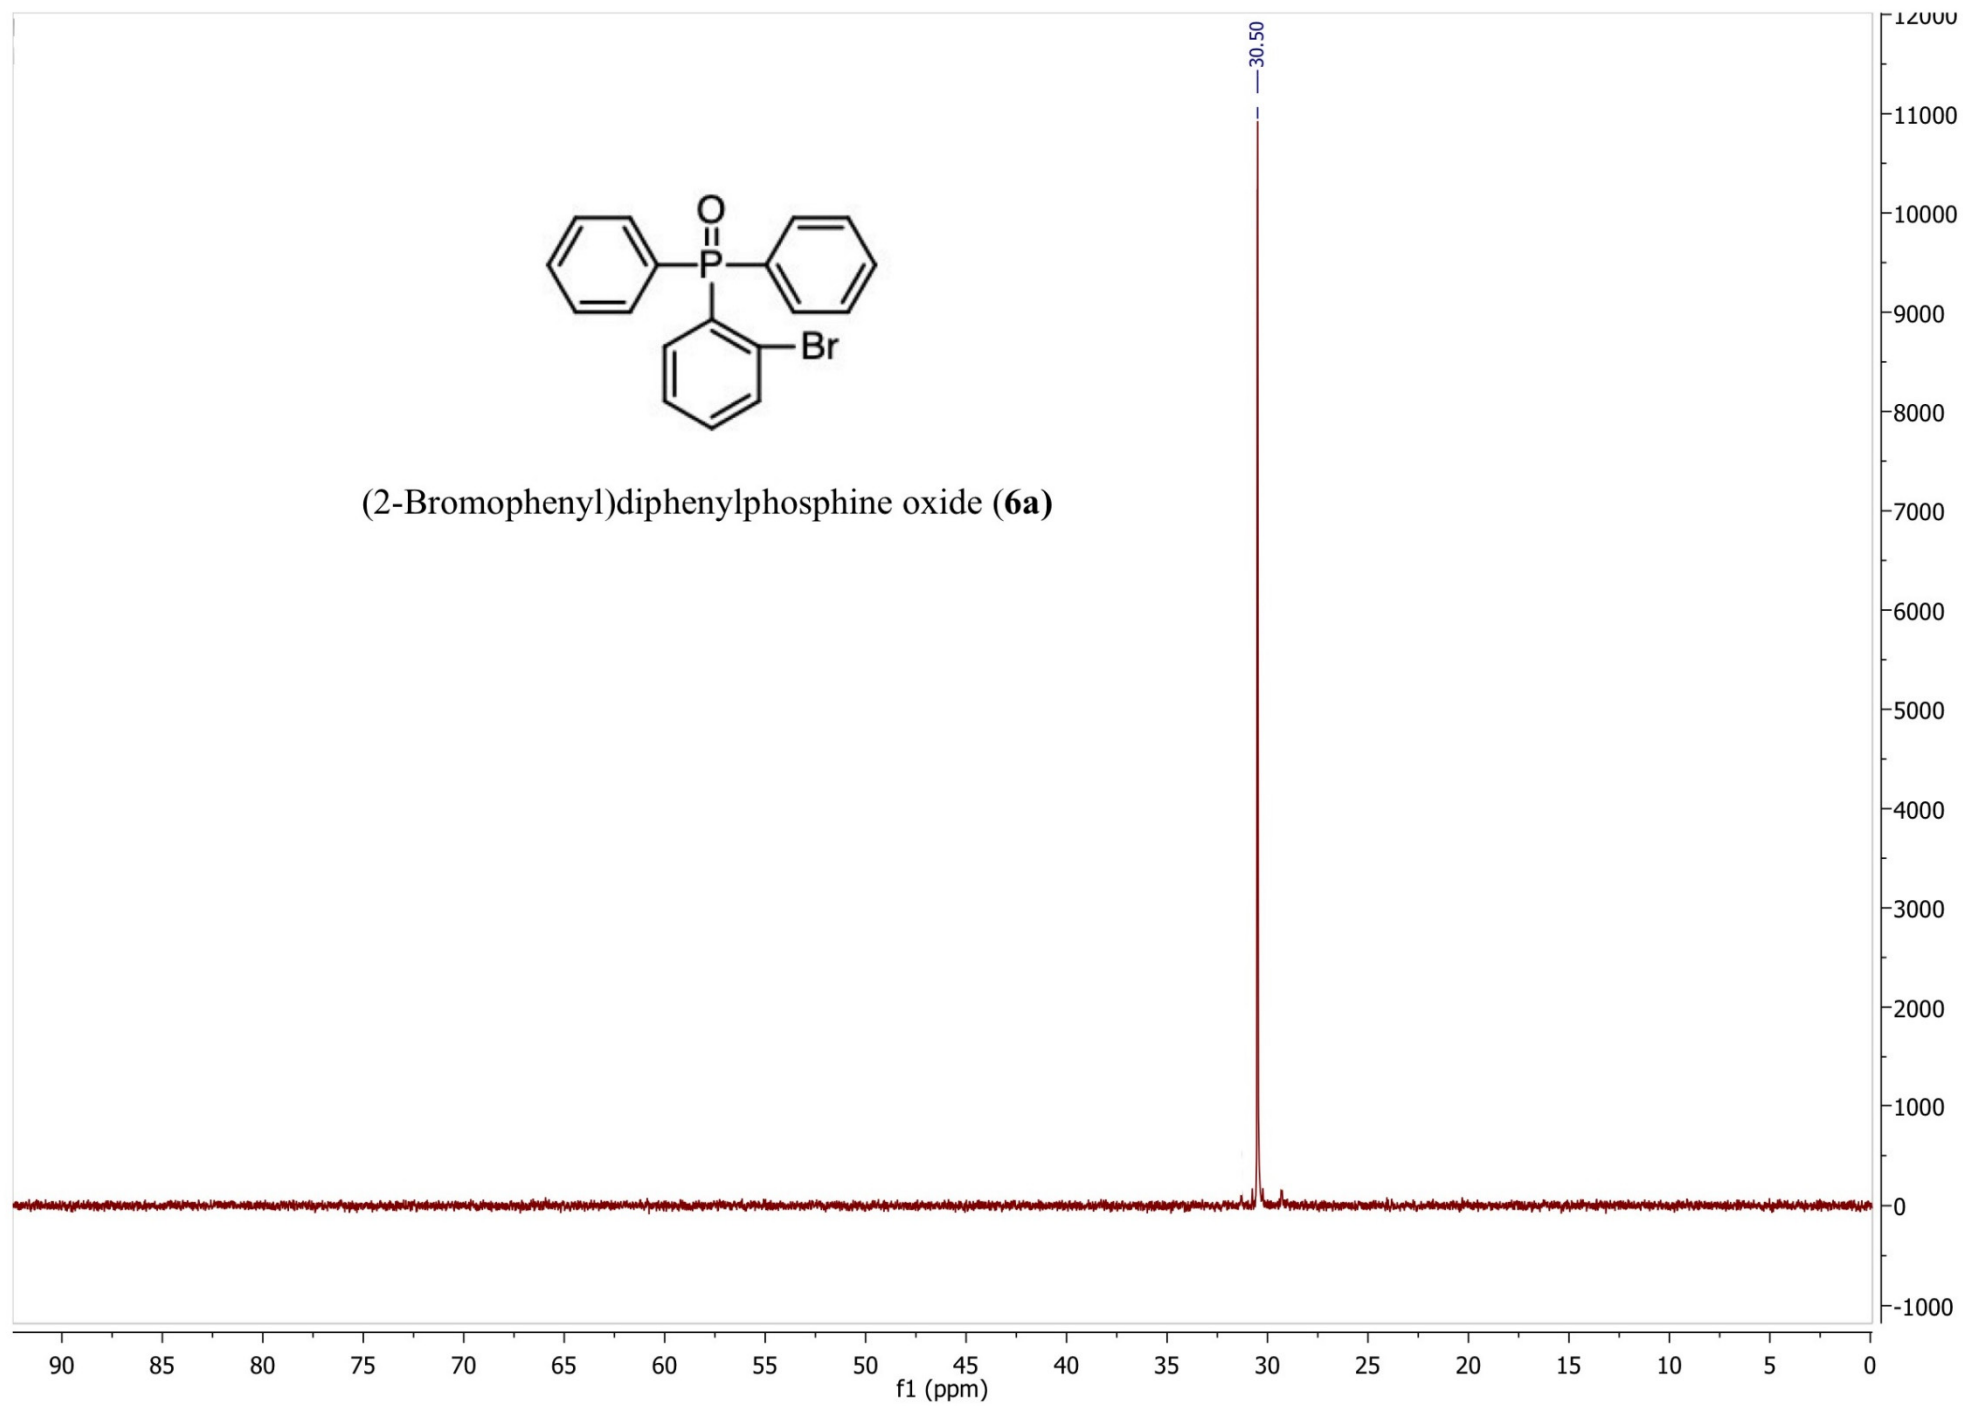

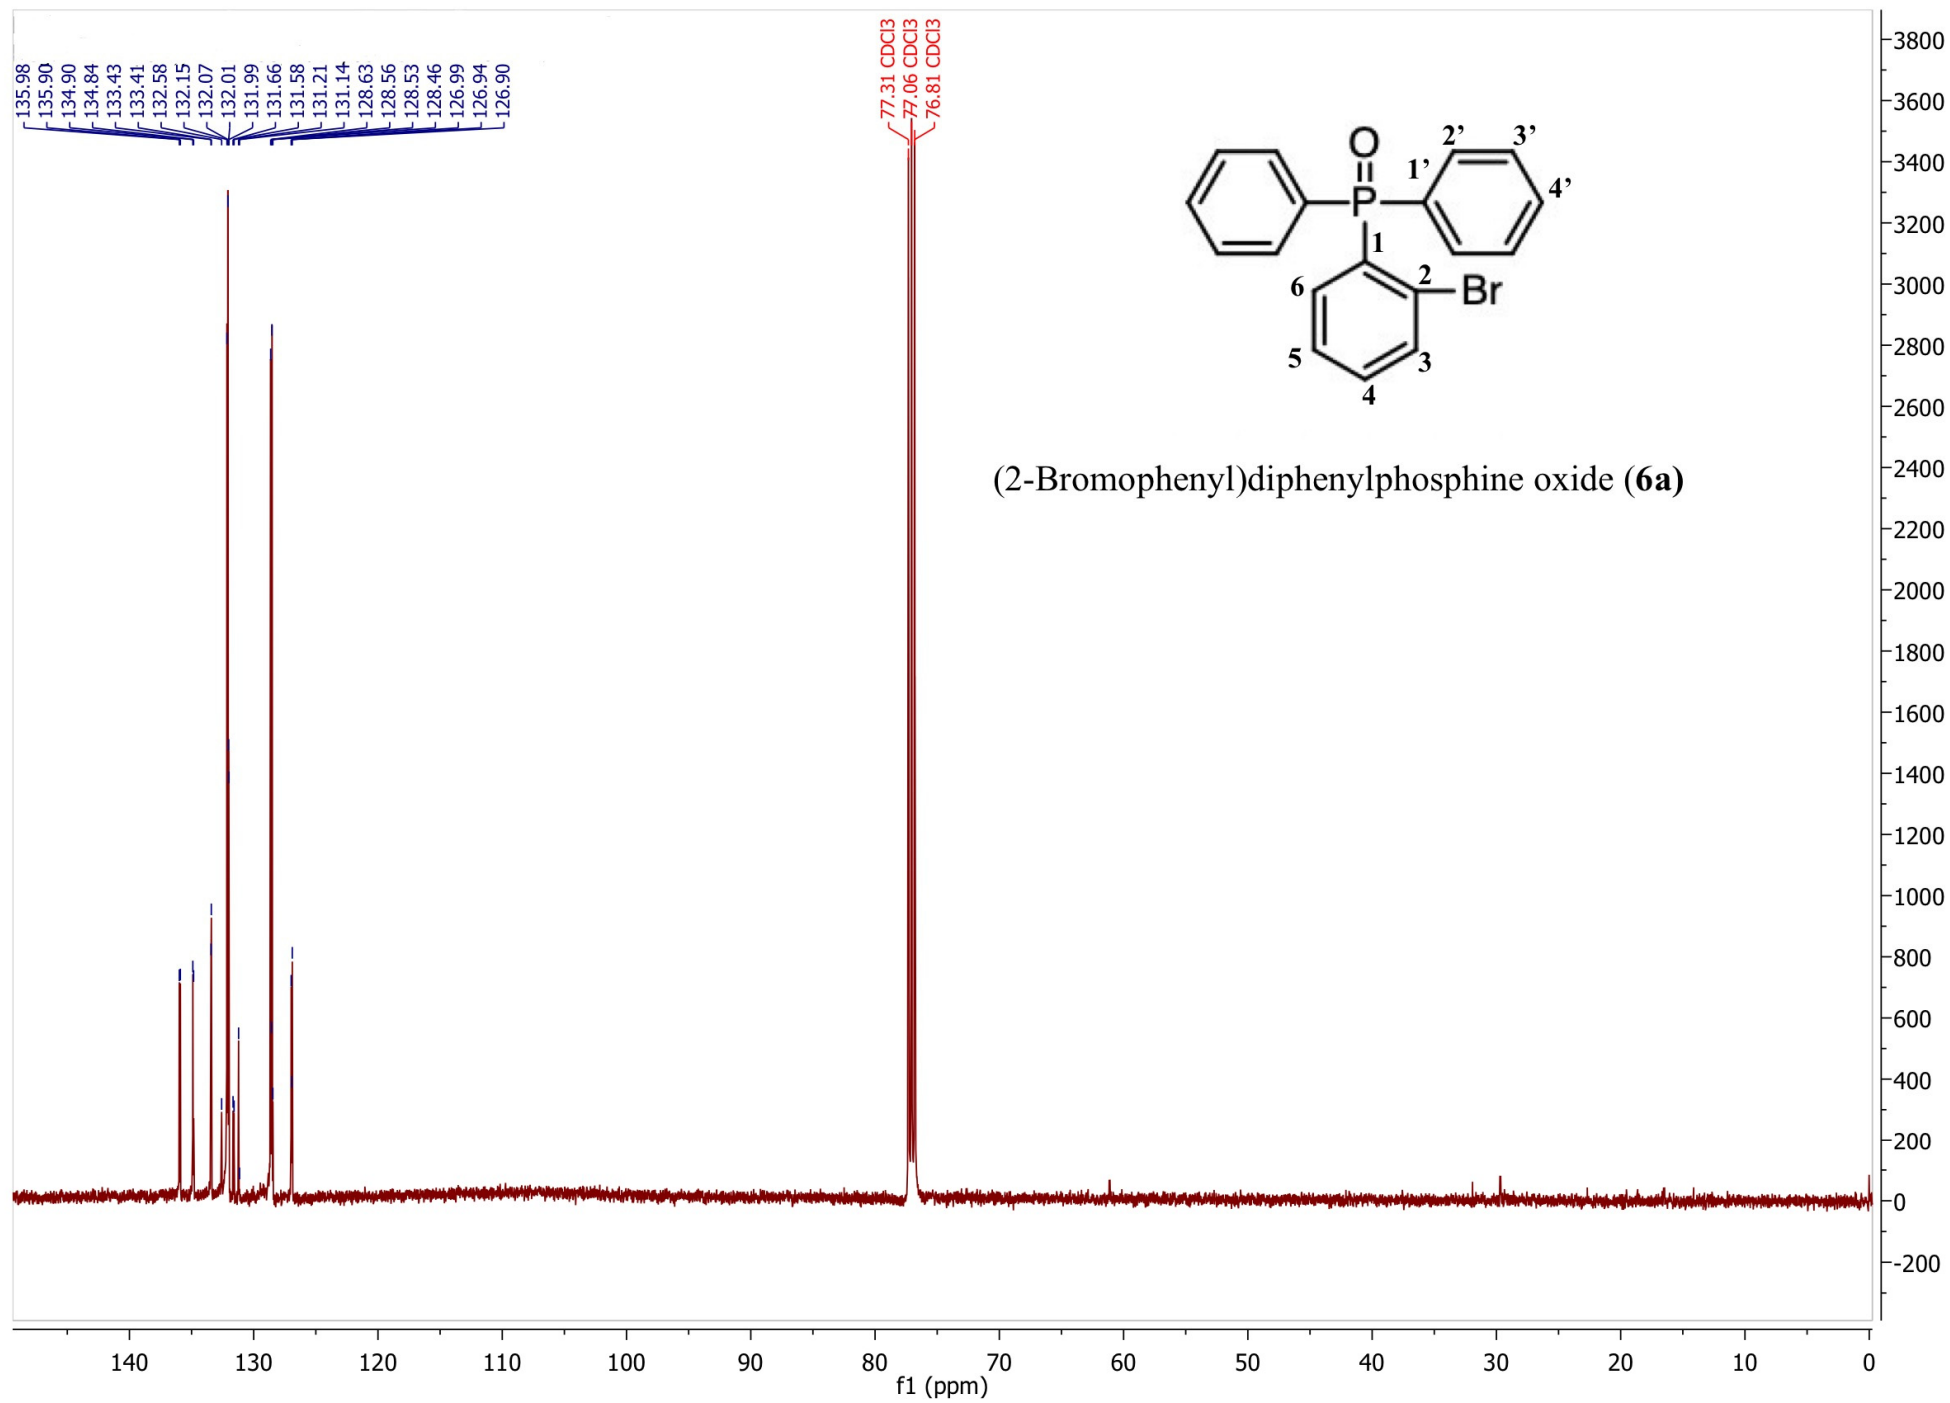

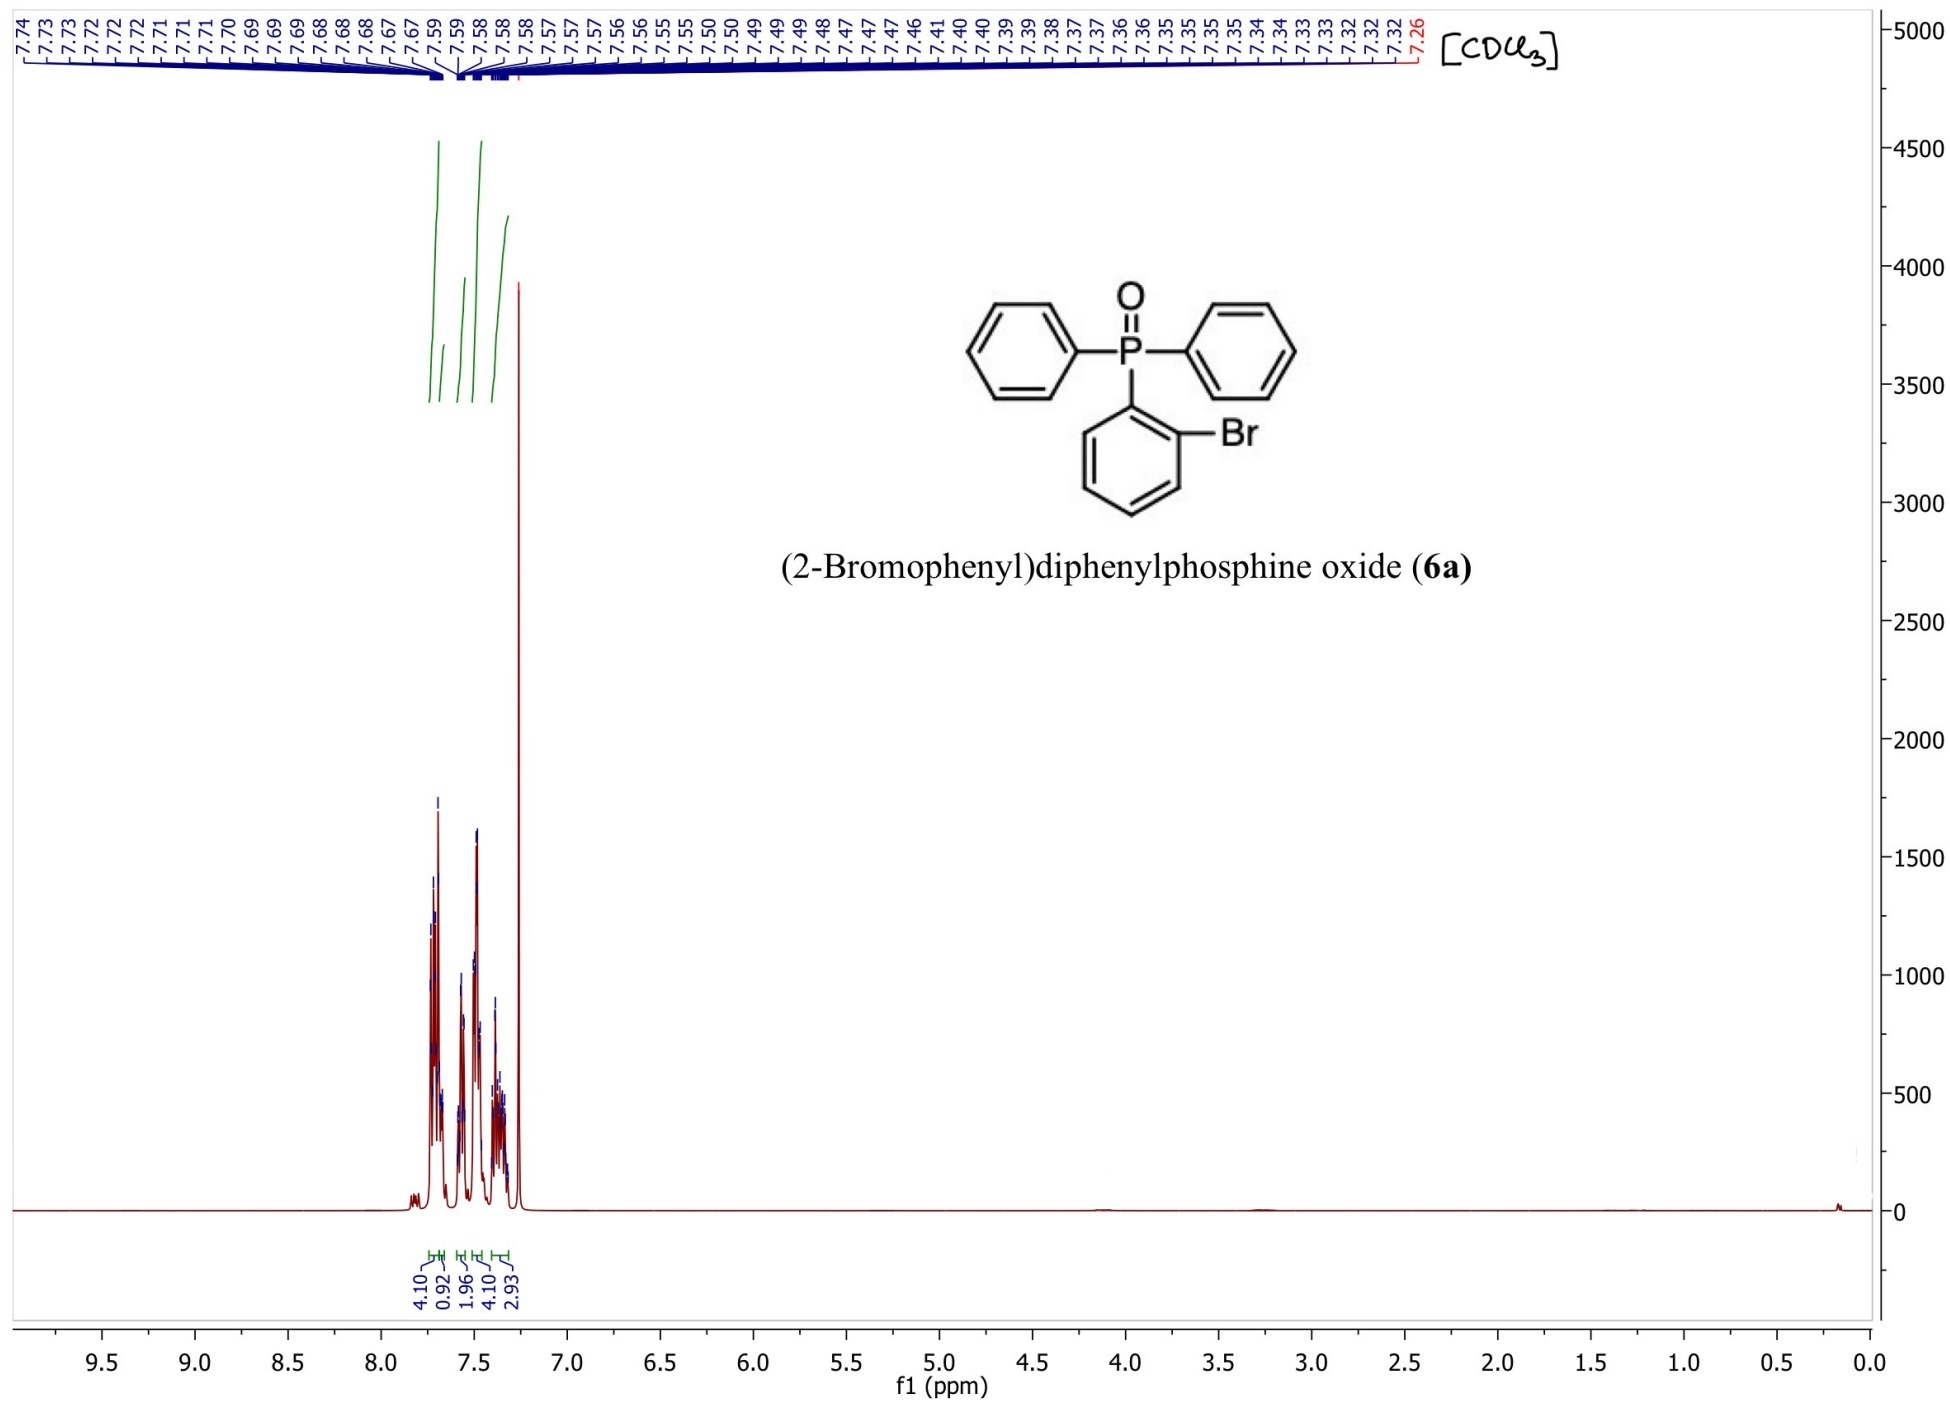



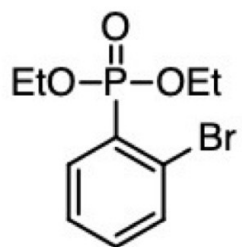

Diethyl 2-bromophenylphosphonate (**6b**)

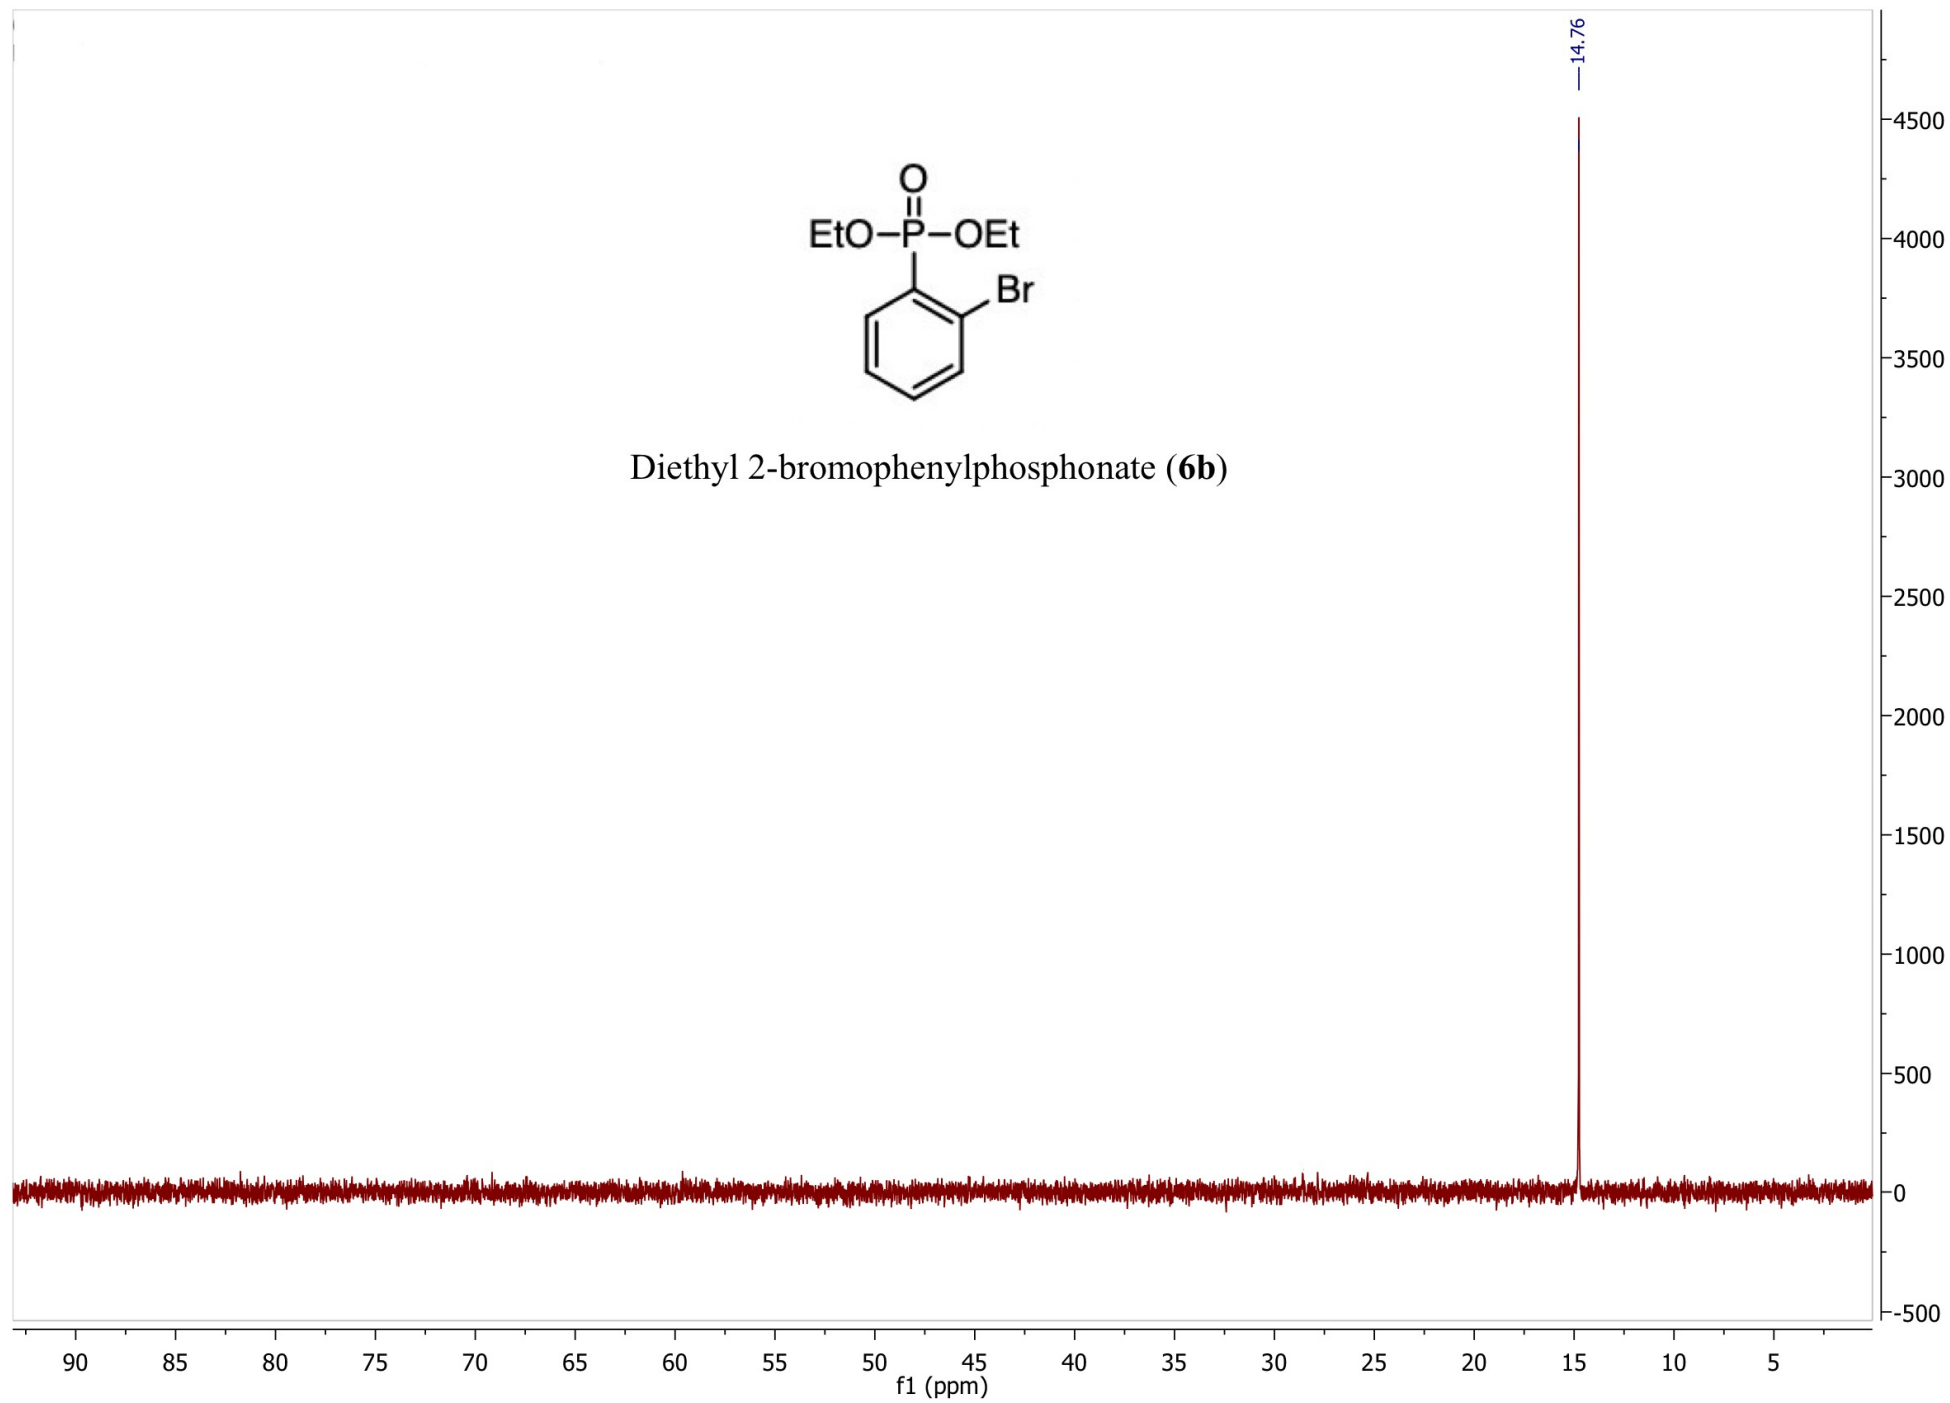

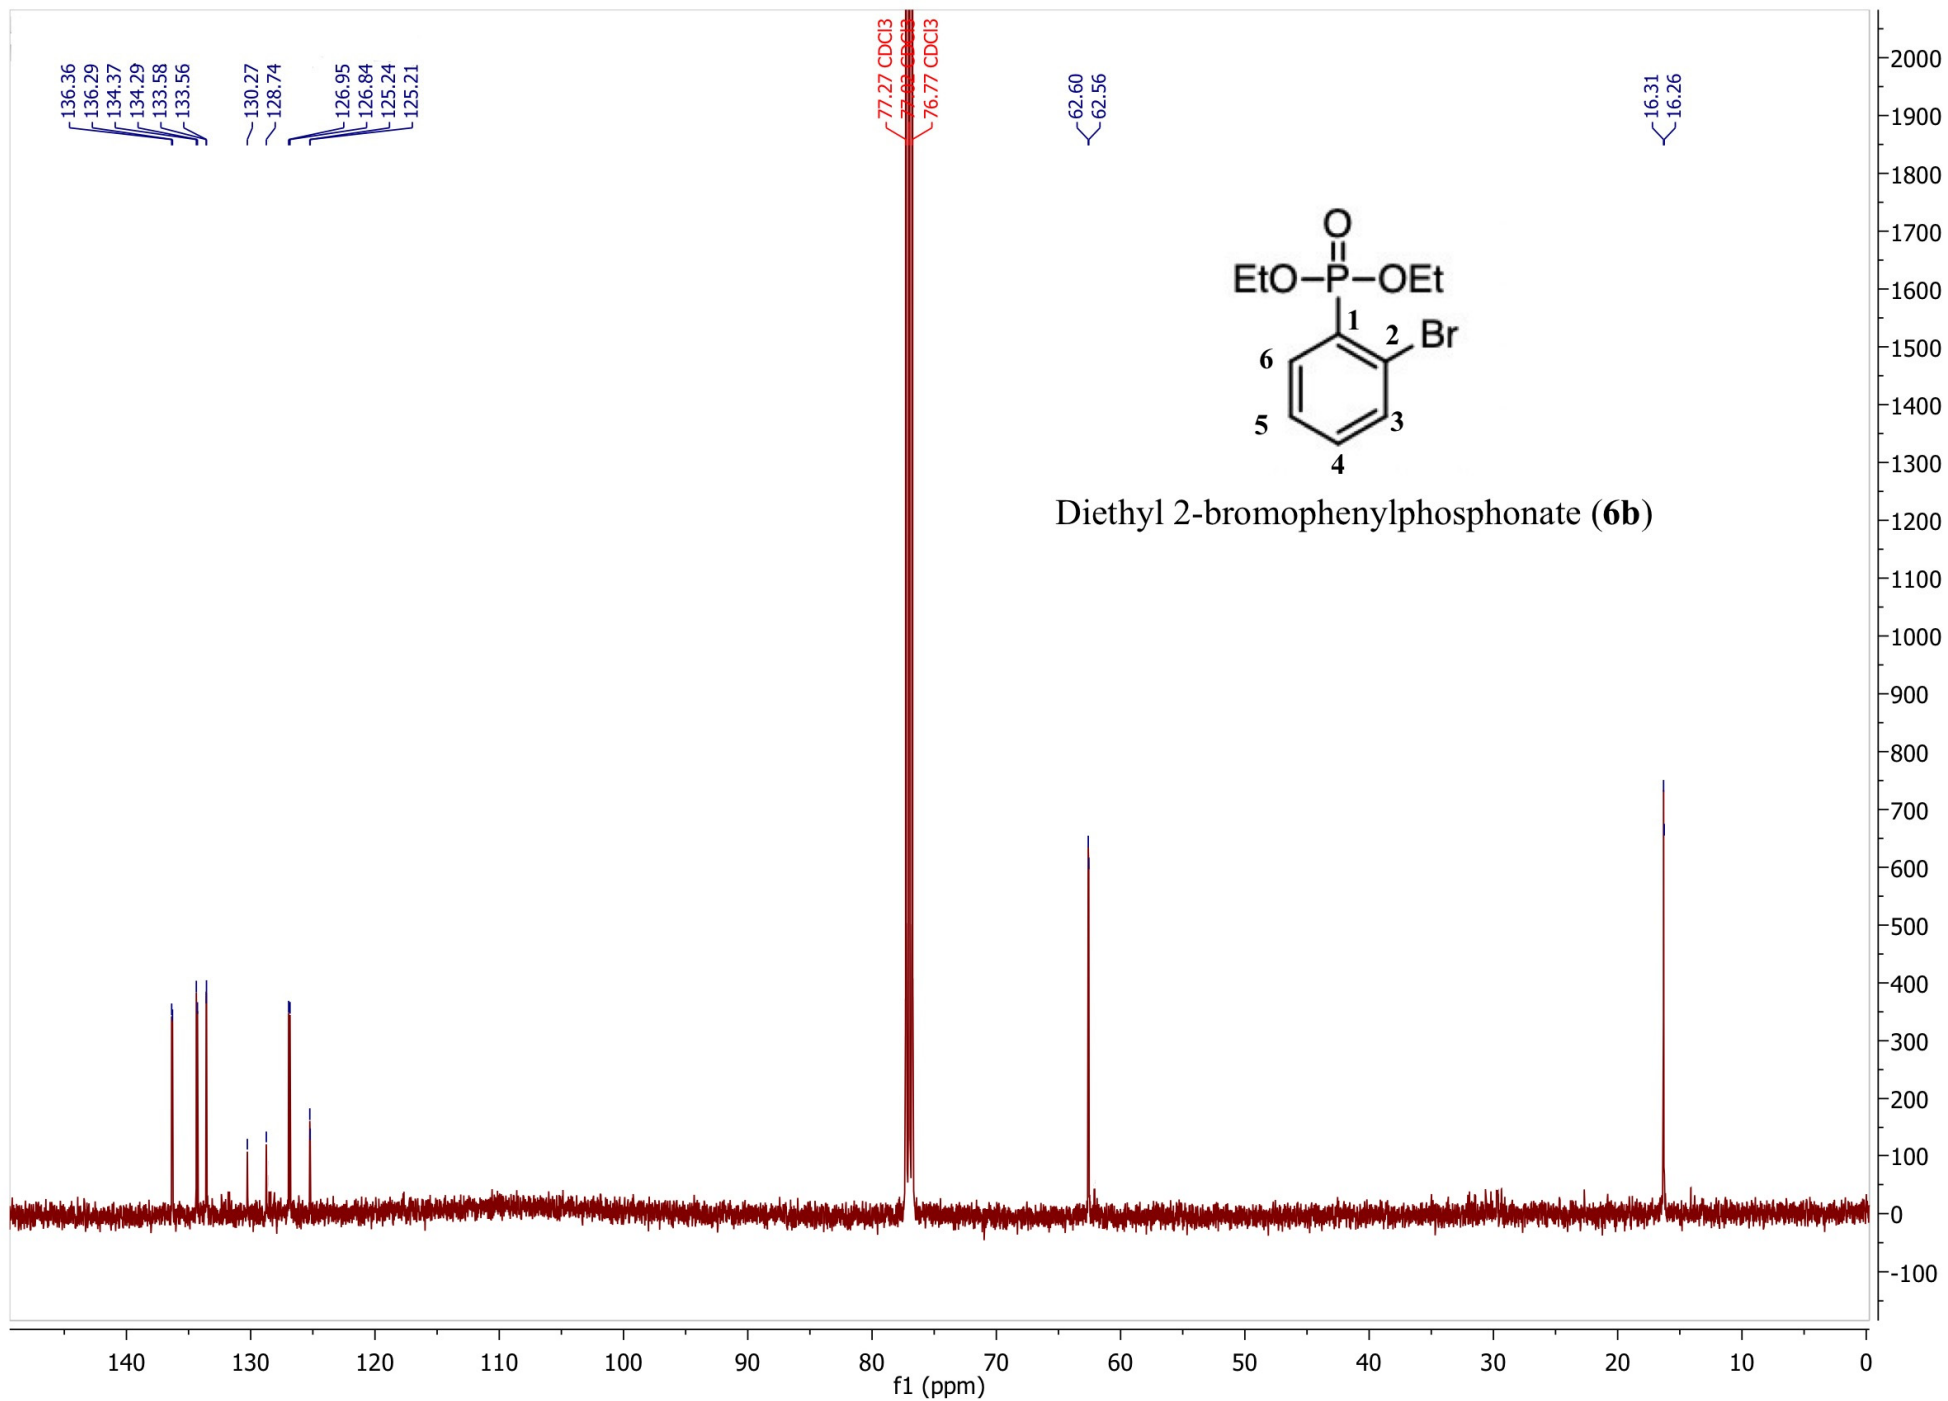

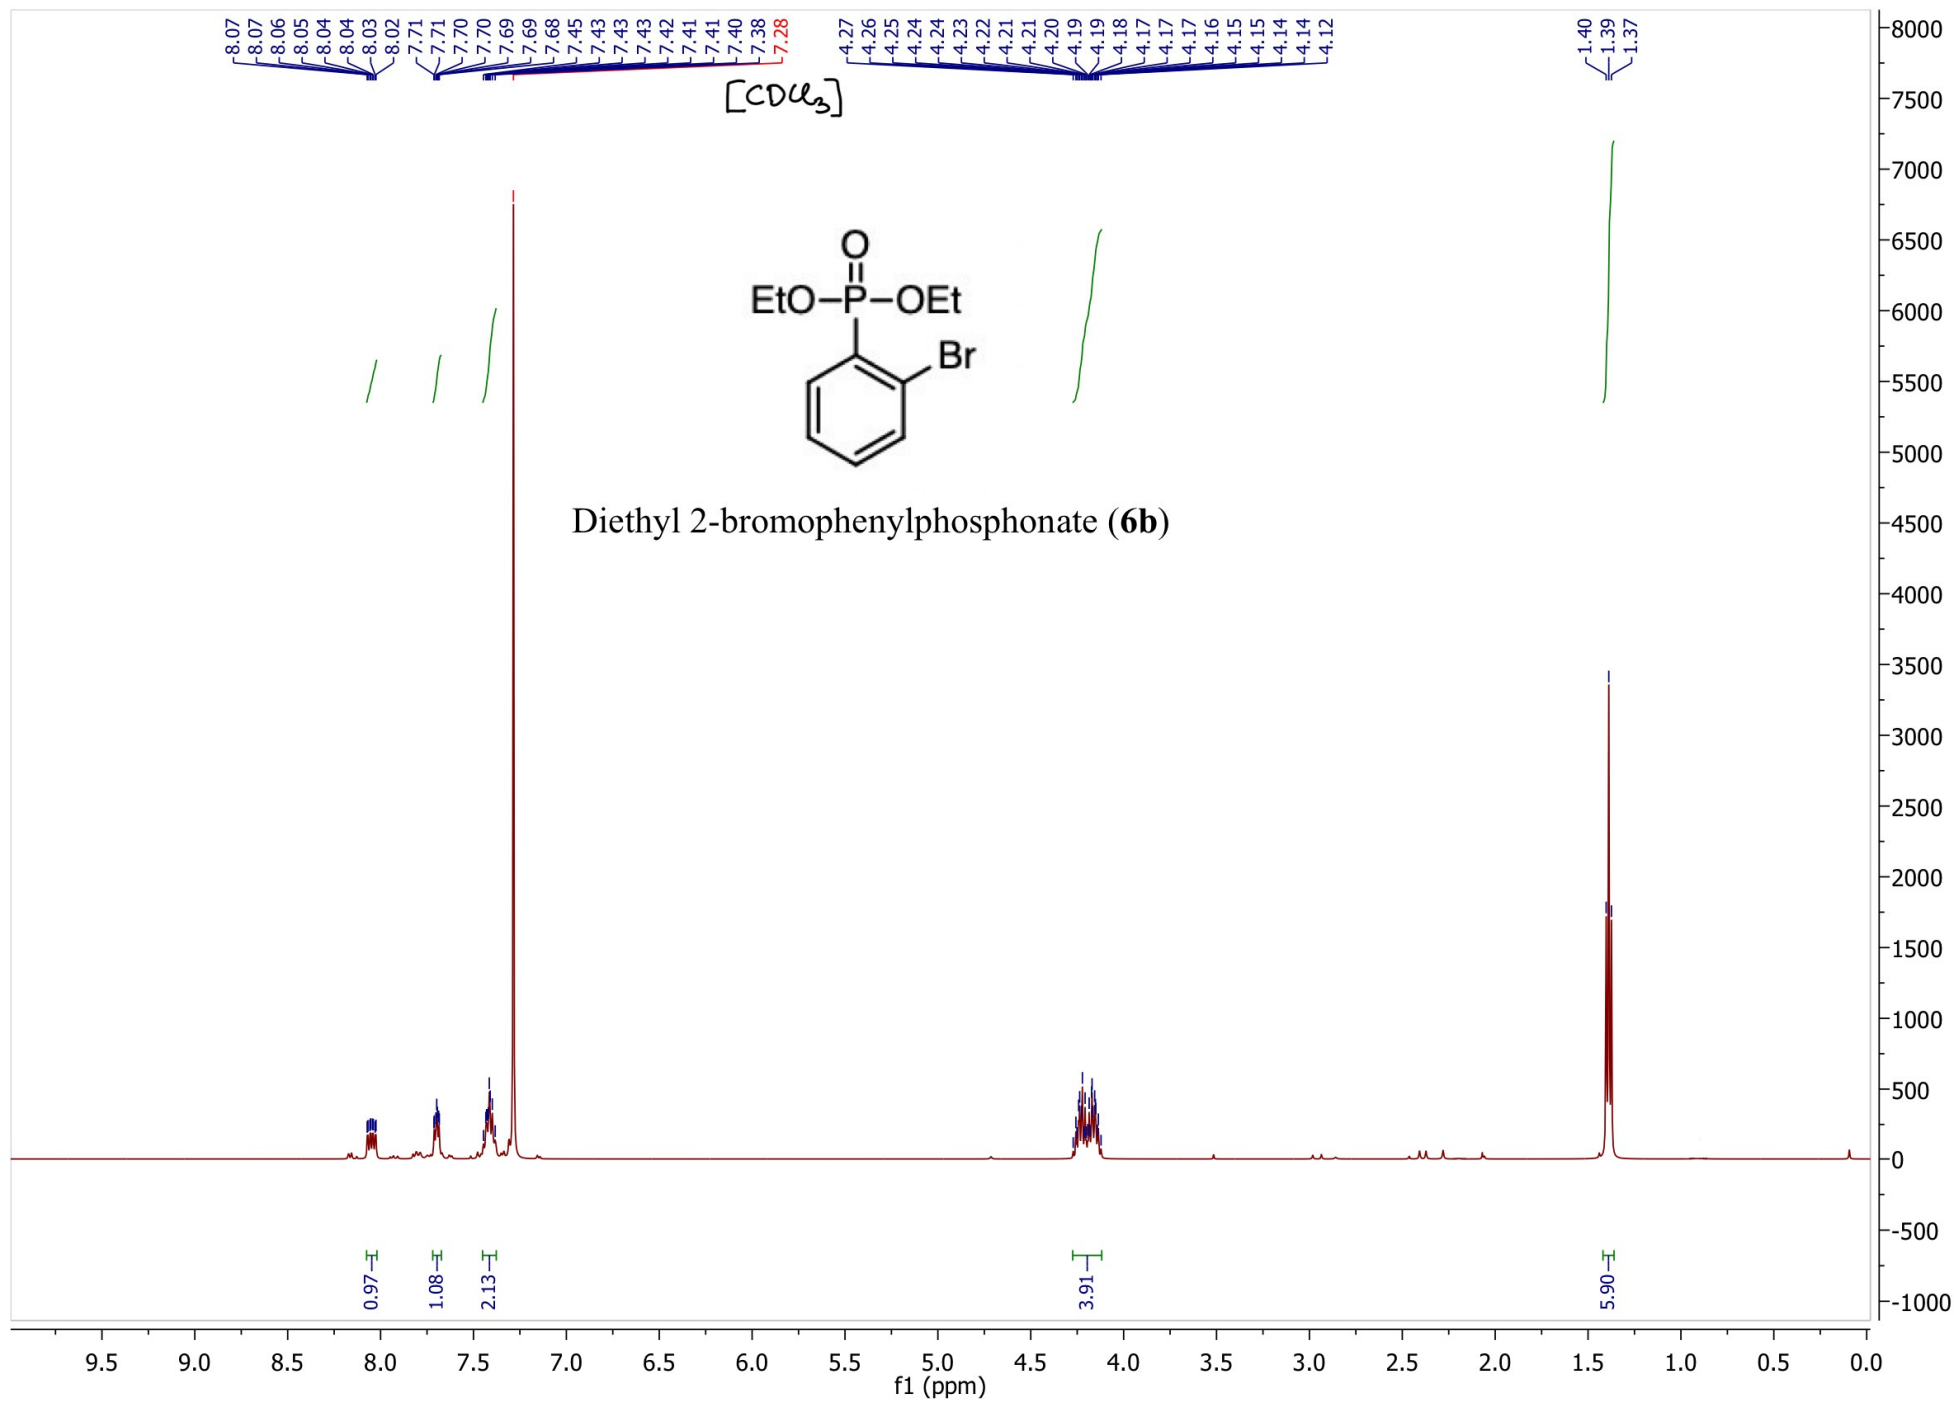

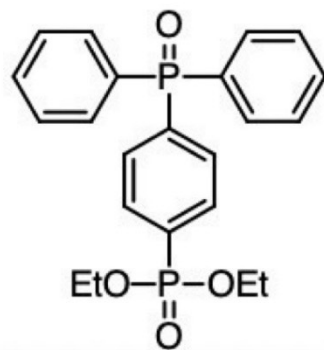

4-Diethylphosphonoylphenyl-diphenylphosphine oxide (**8**)

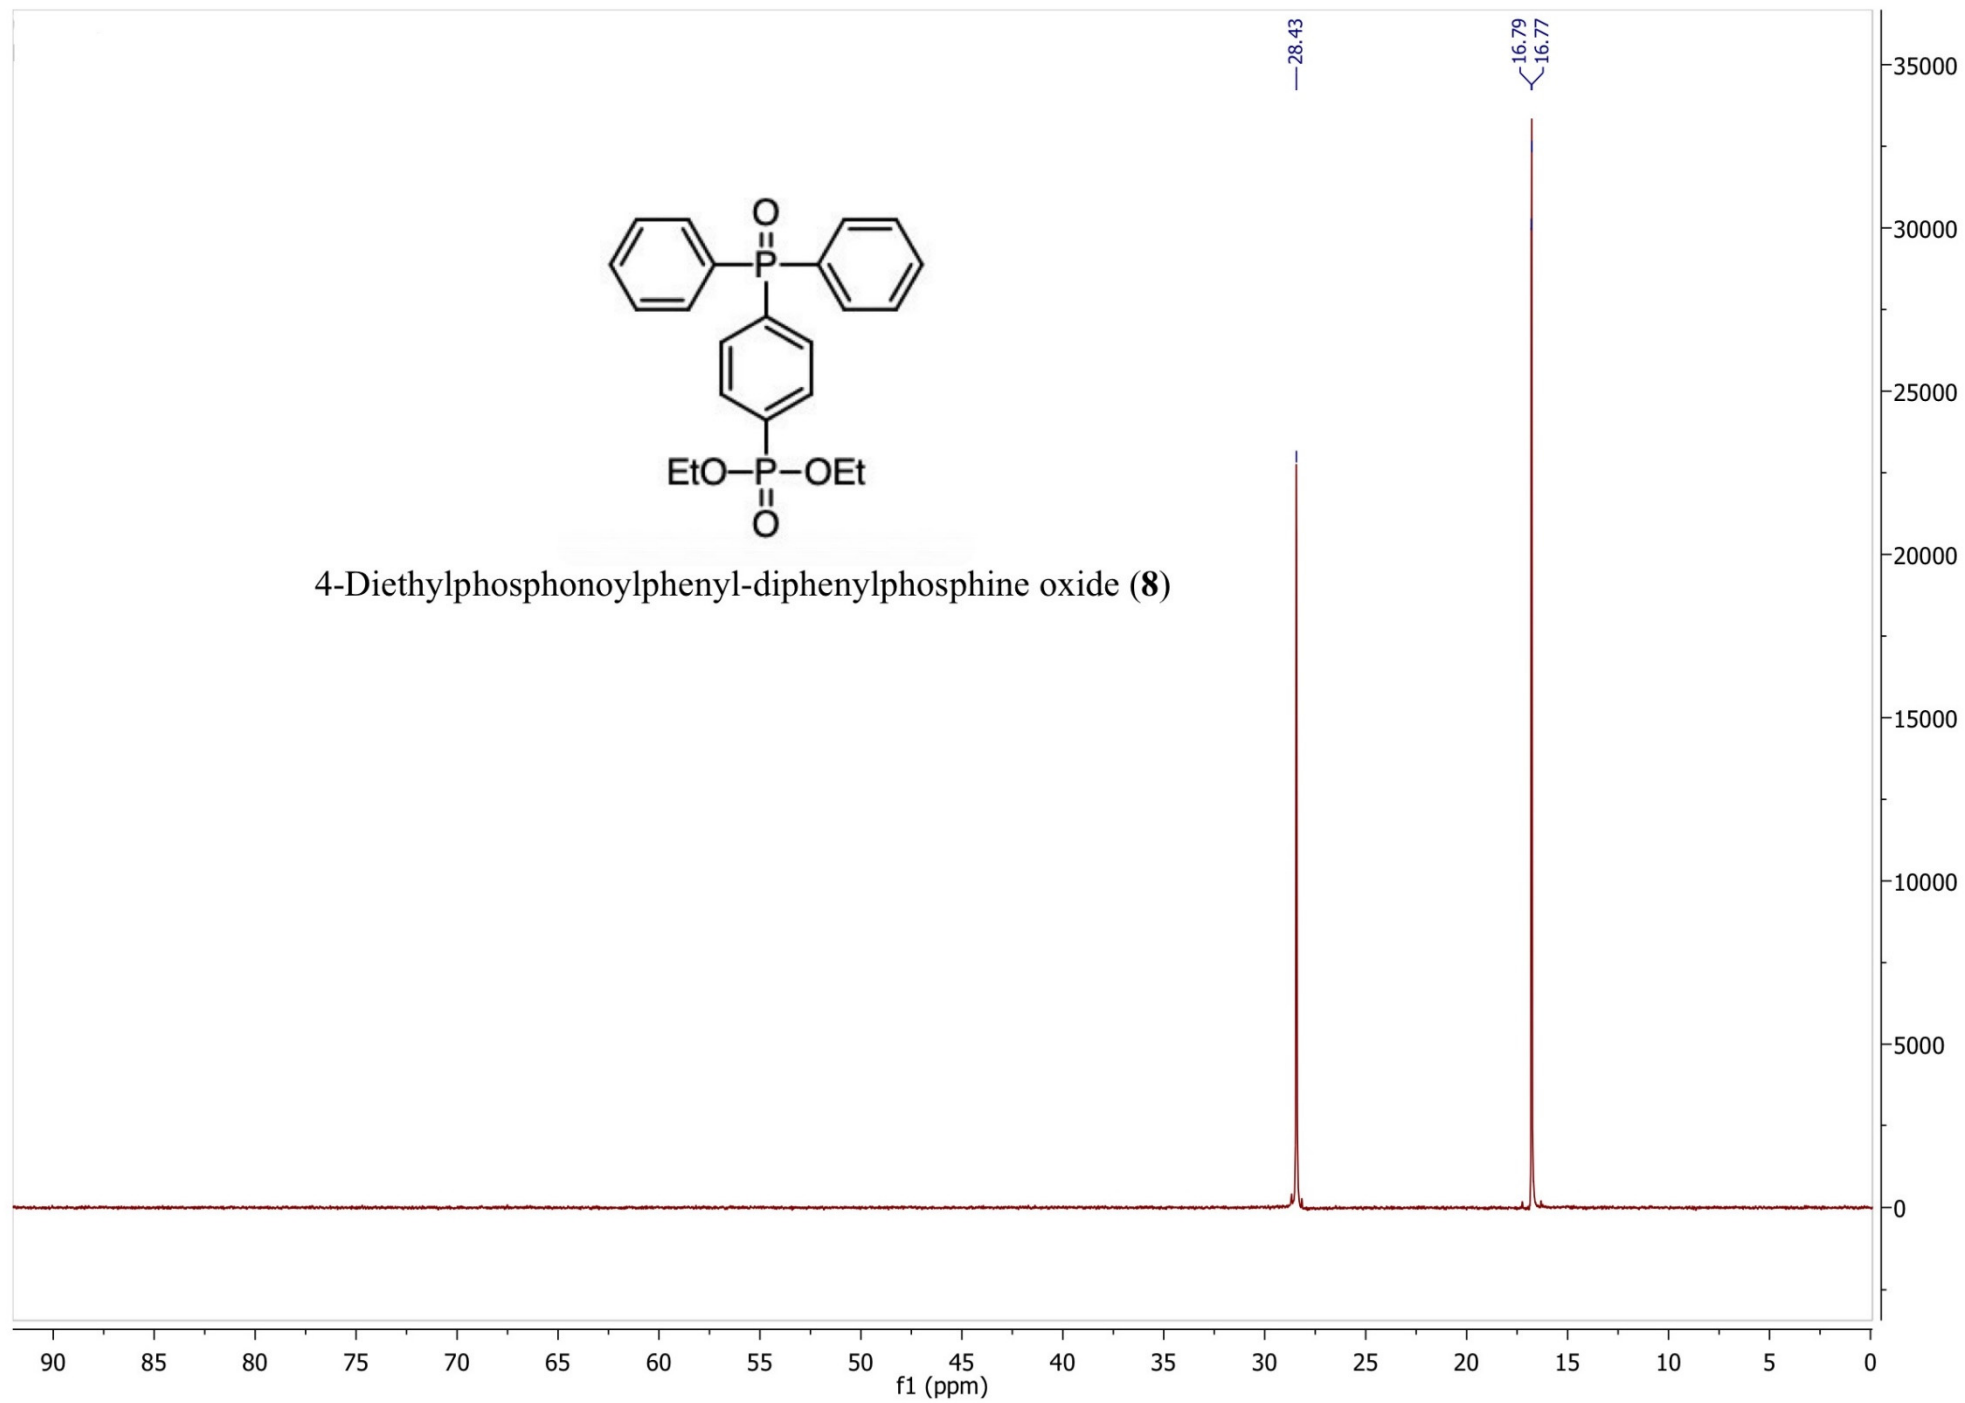

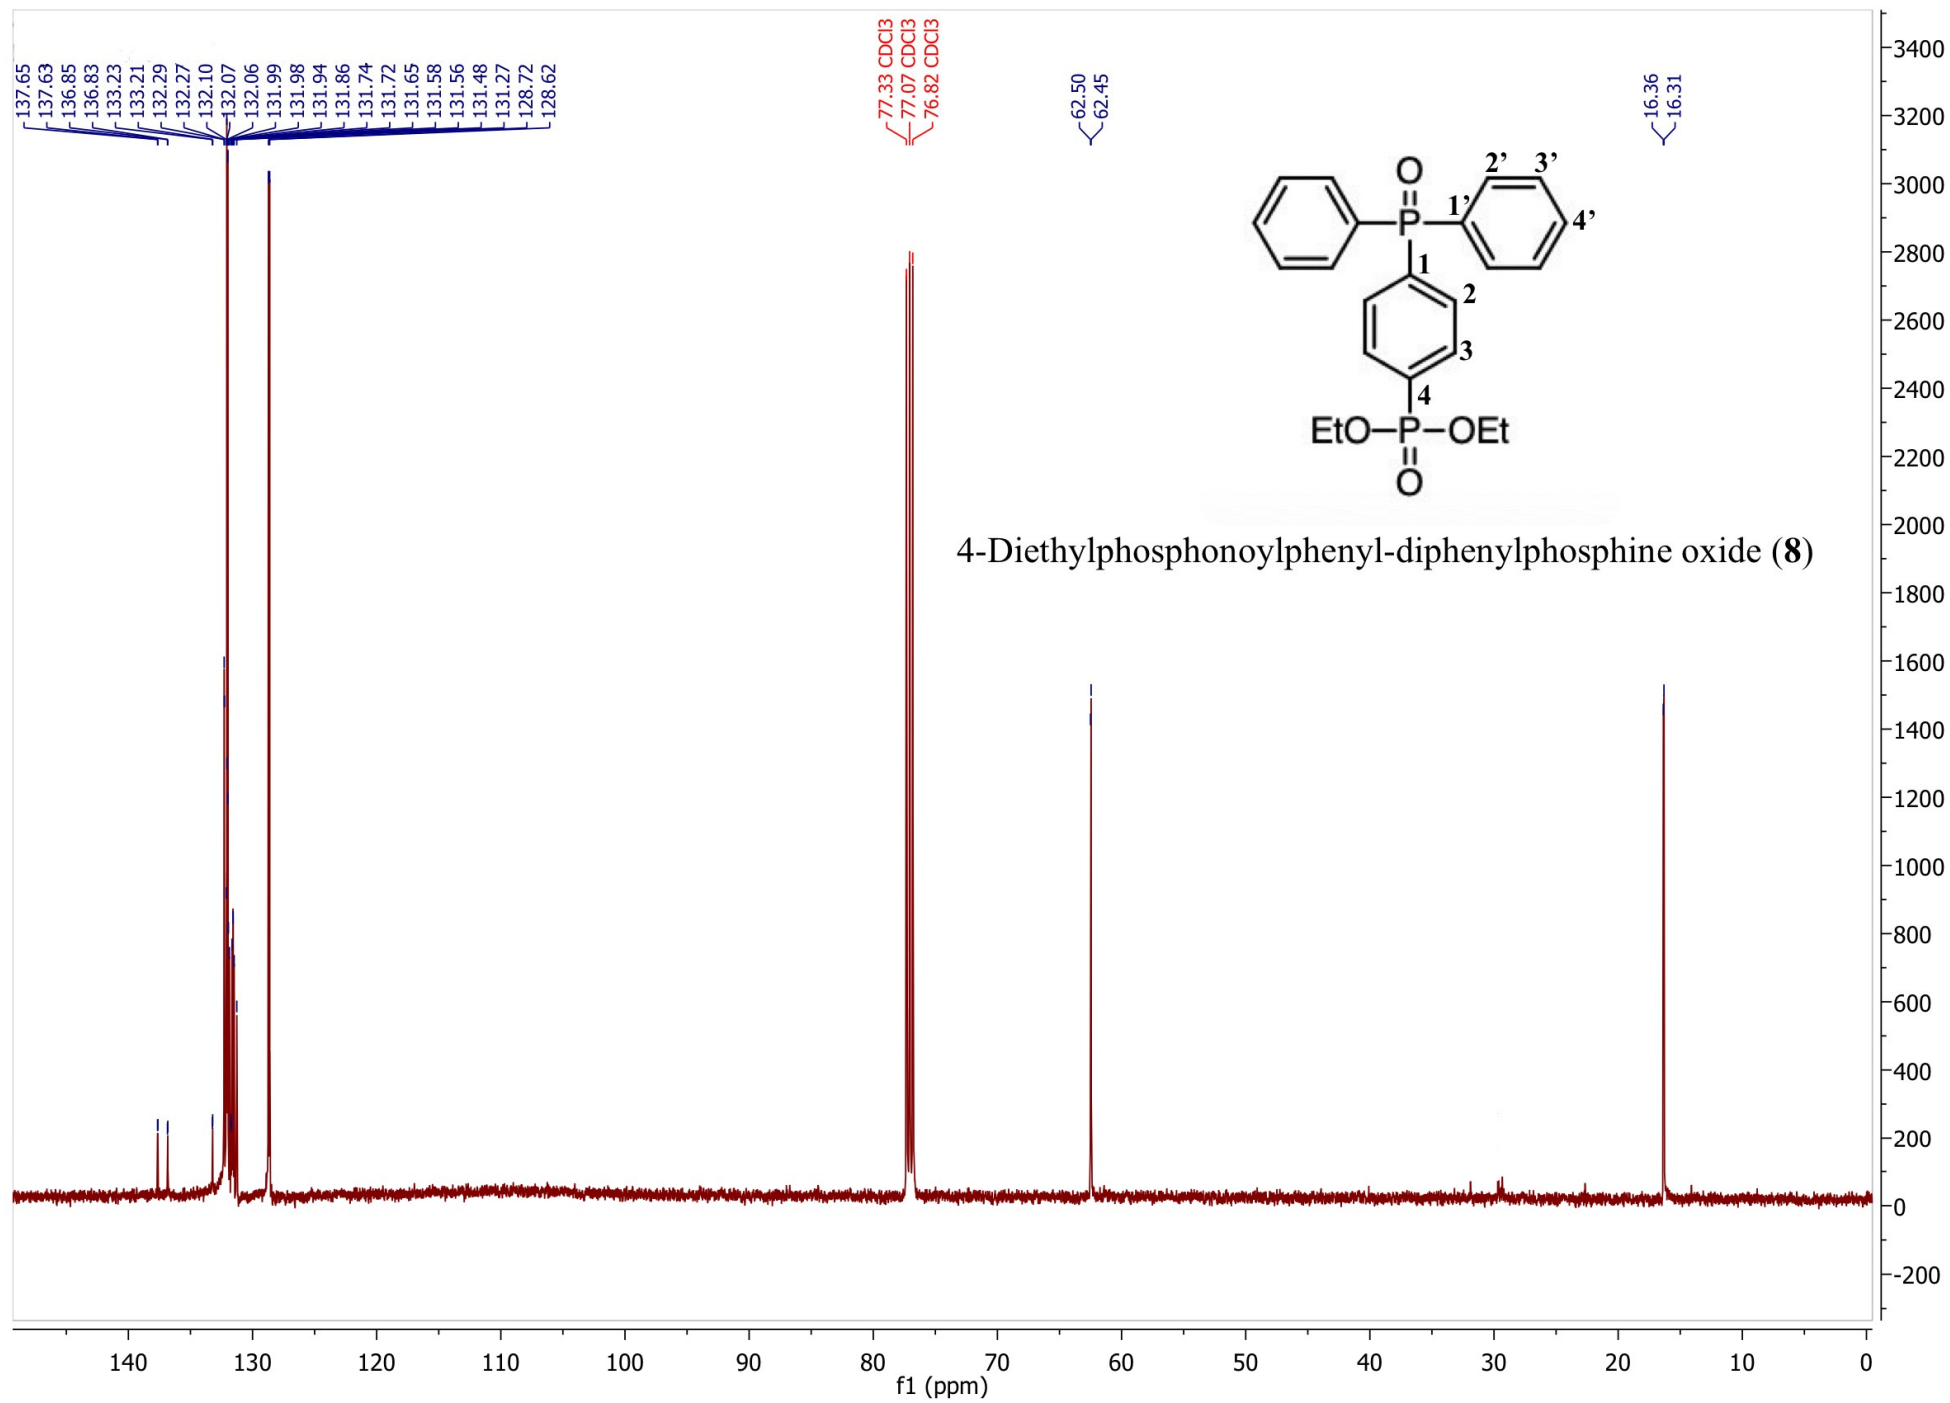

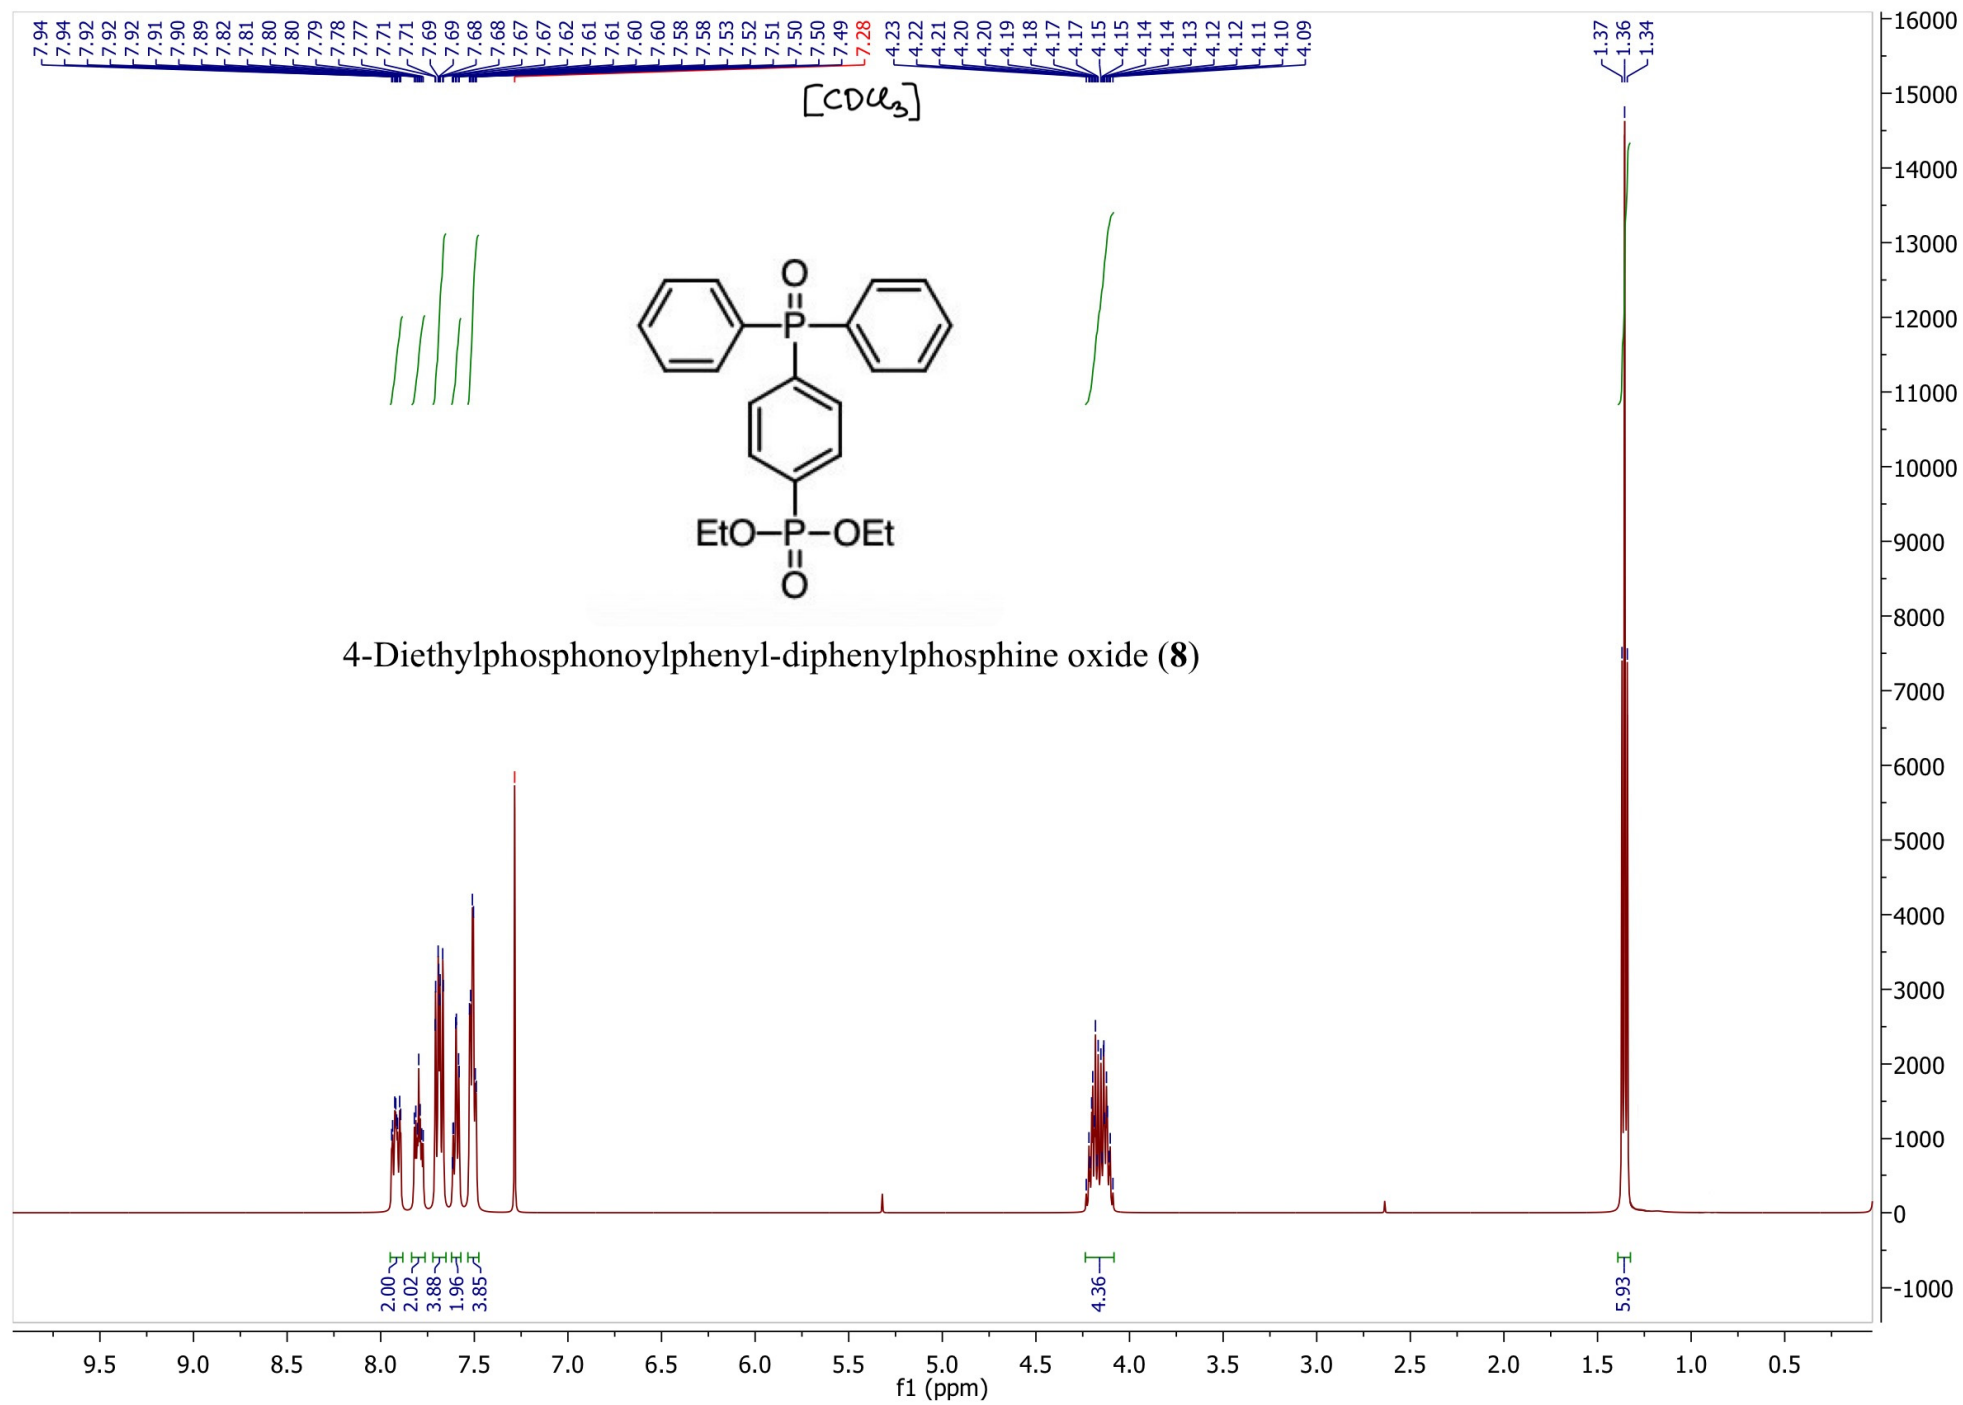4-Diethylphosphonoylphenyl-diphenylphosphine oxide (**8**)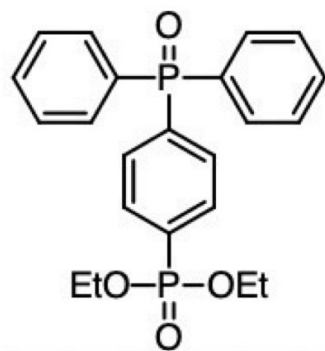

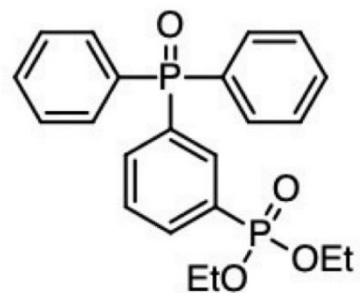

3-Diethylphosphonoylphenyl-diphenylphosphine oxide (**9**)

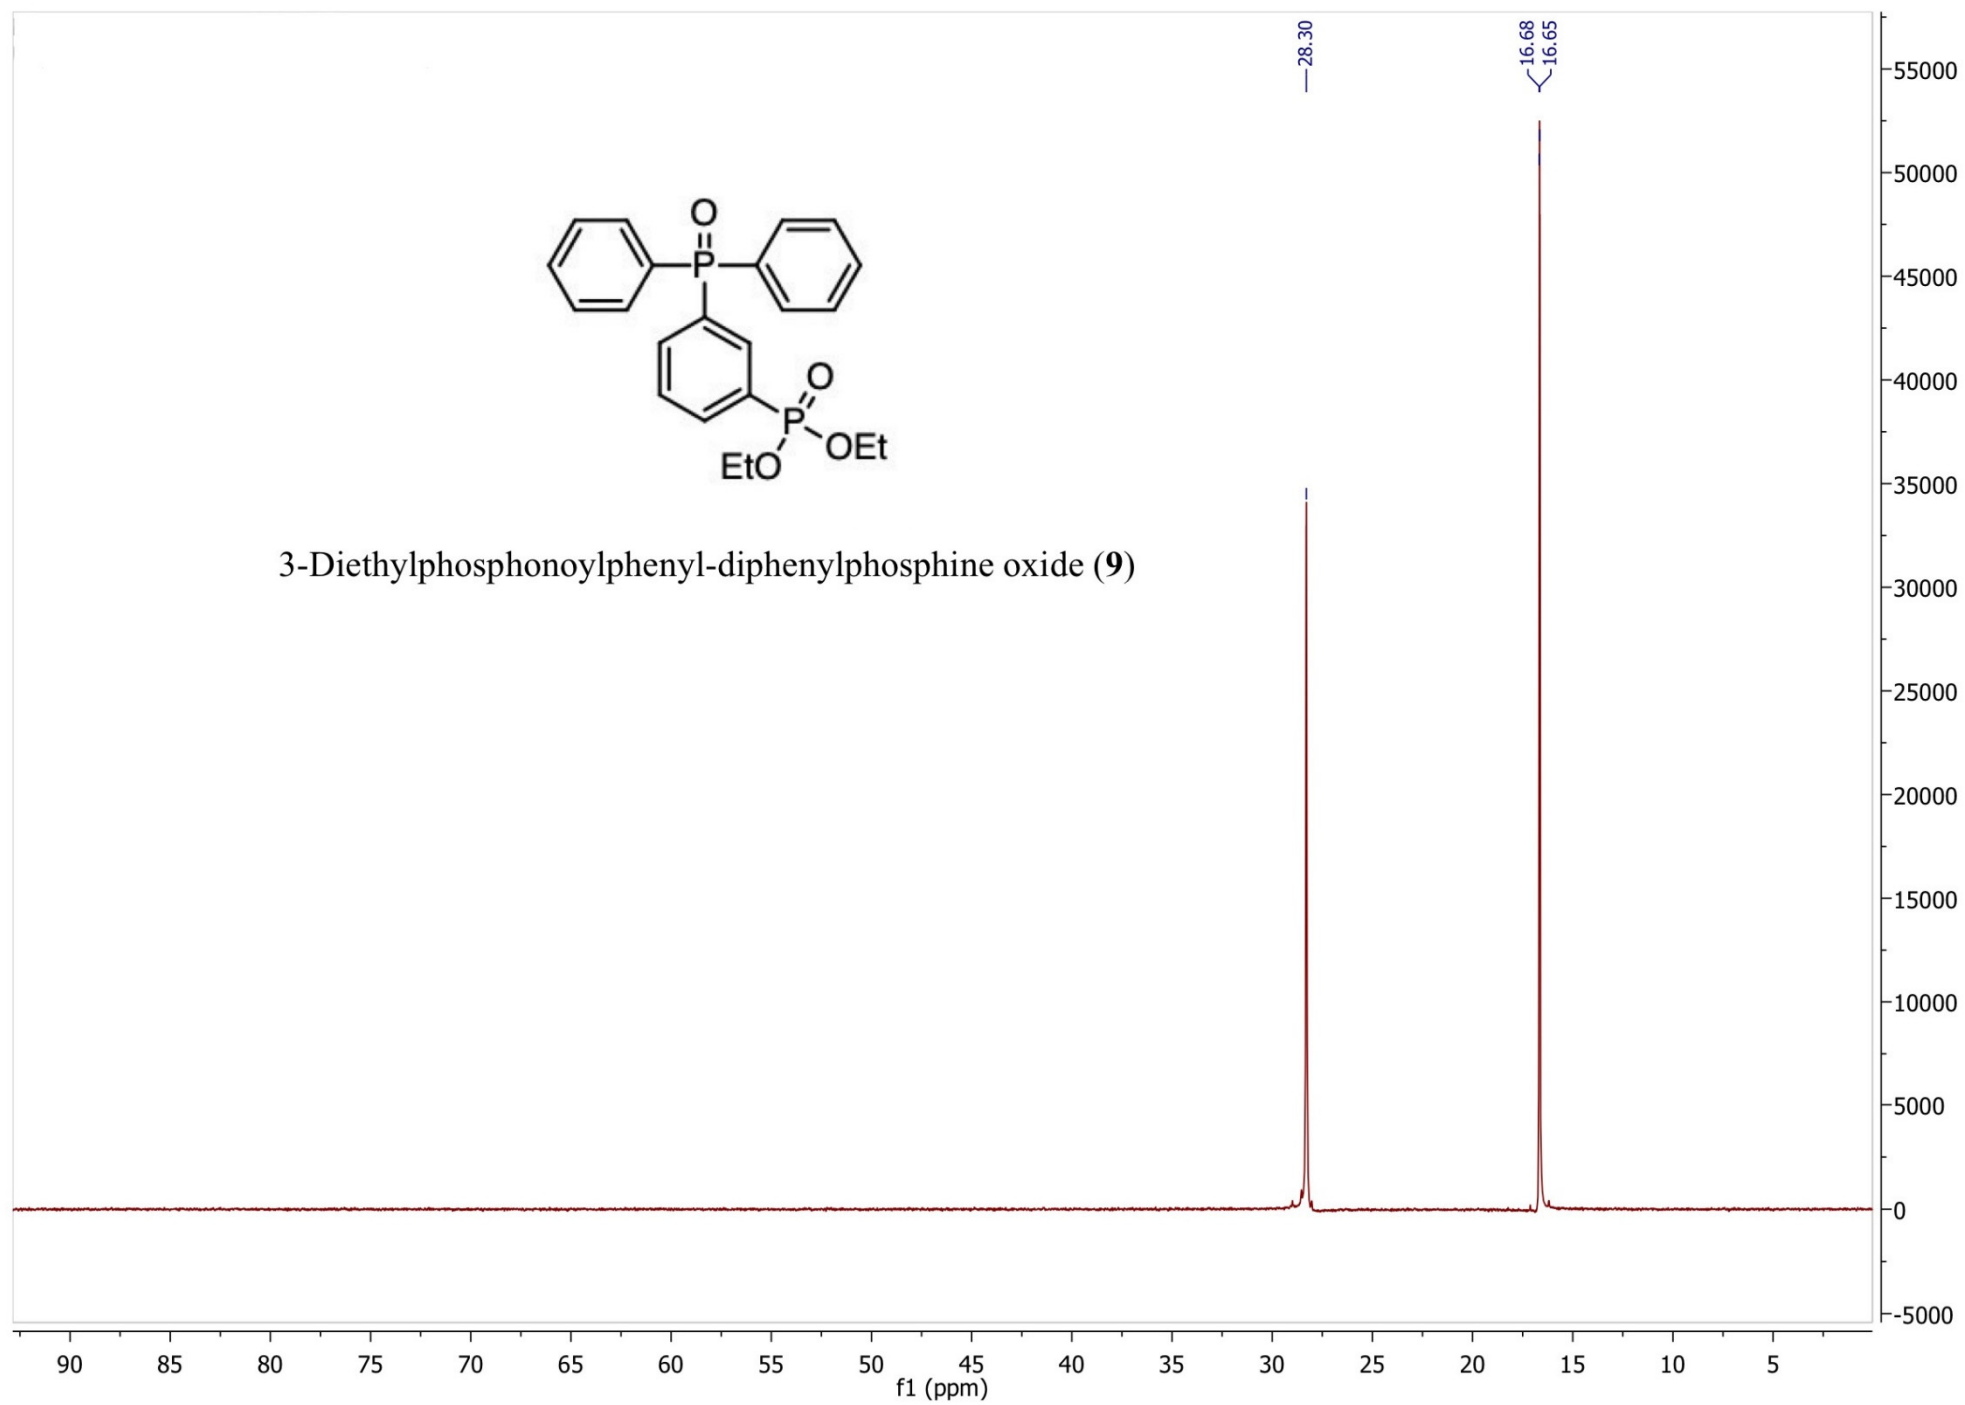

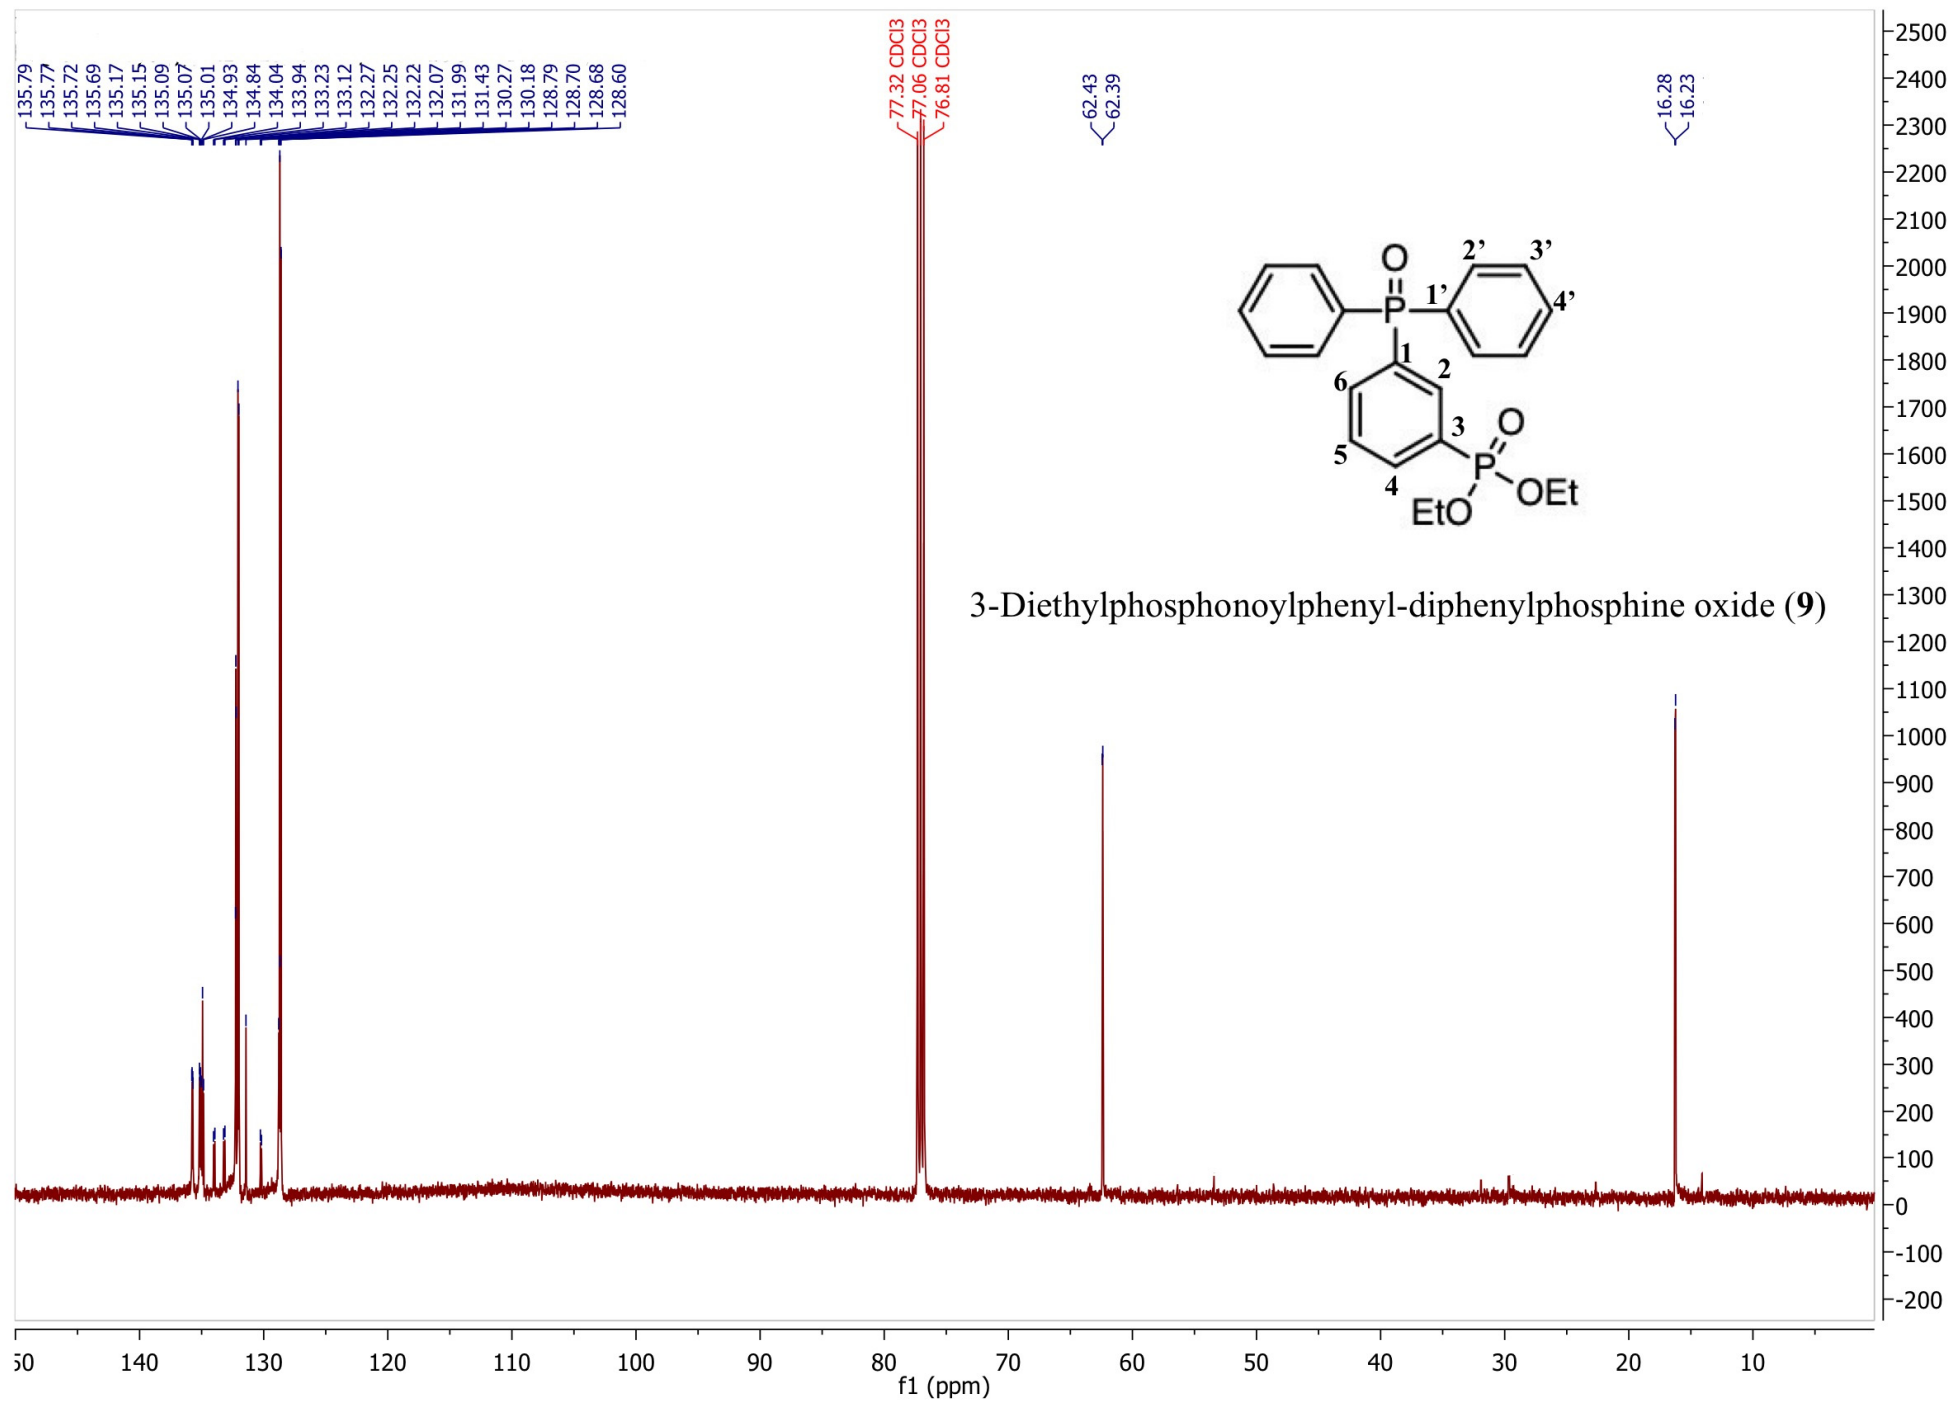



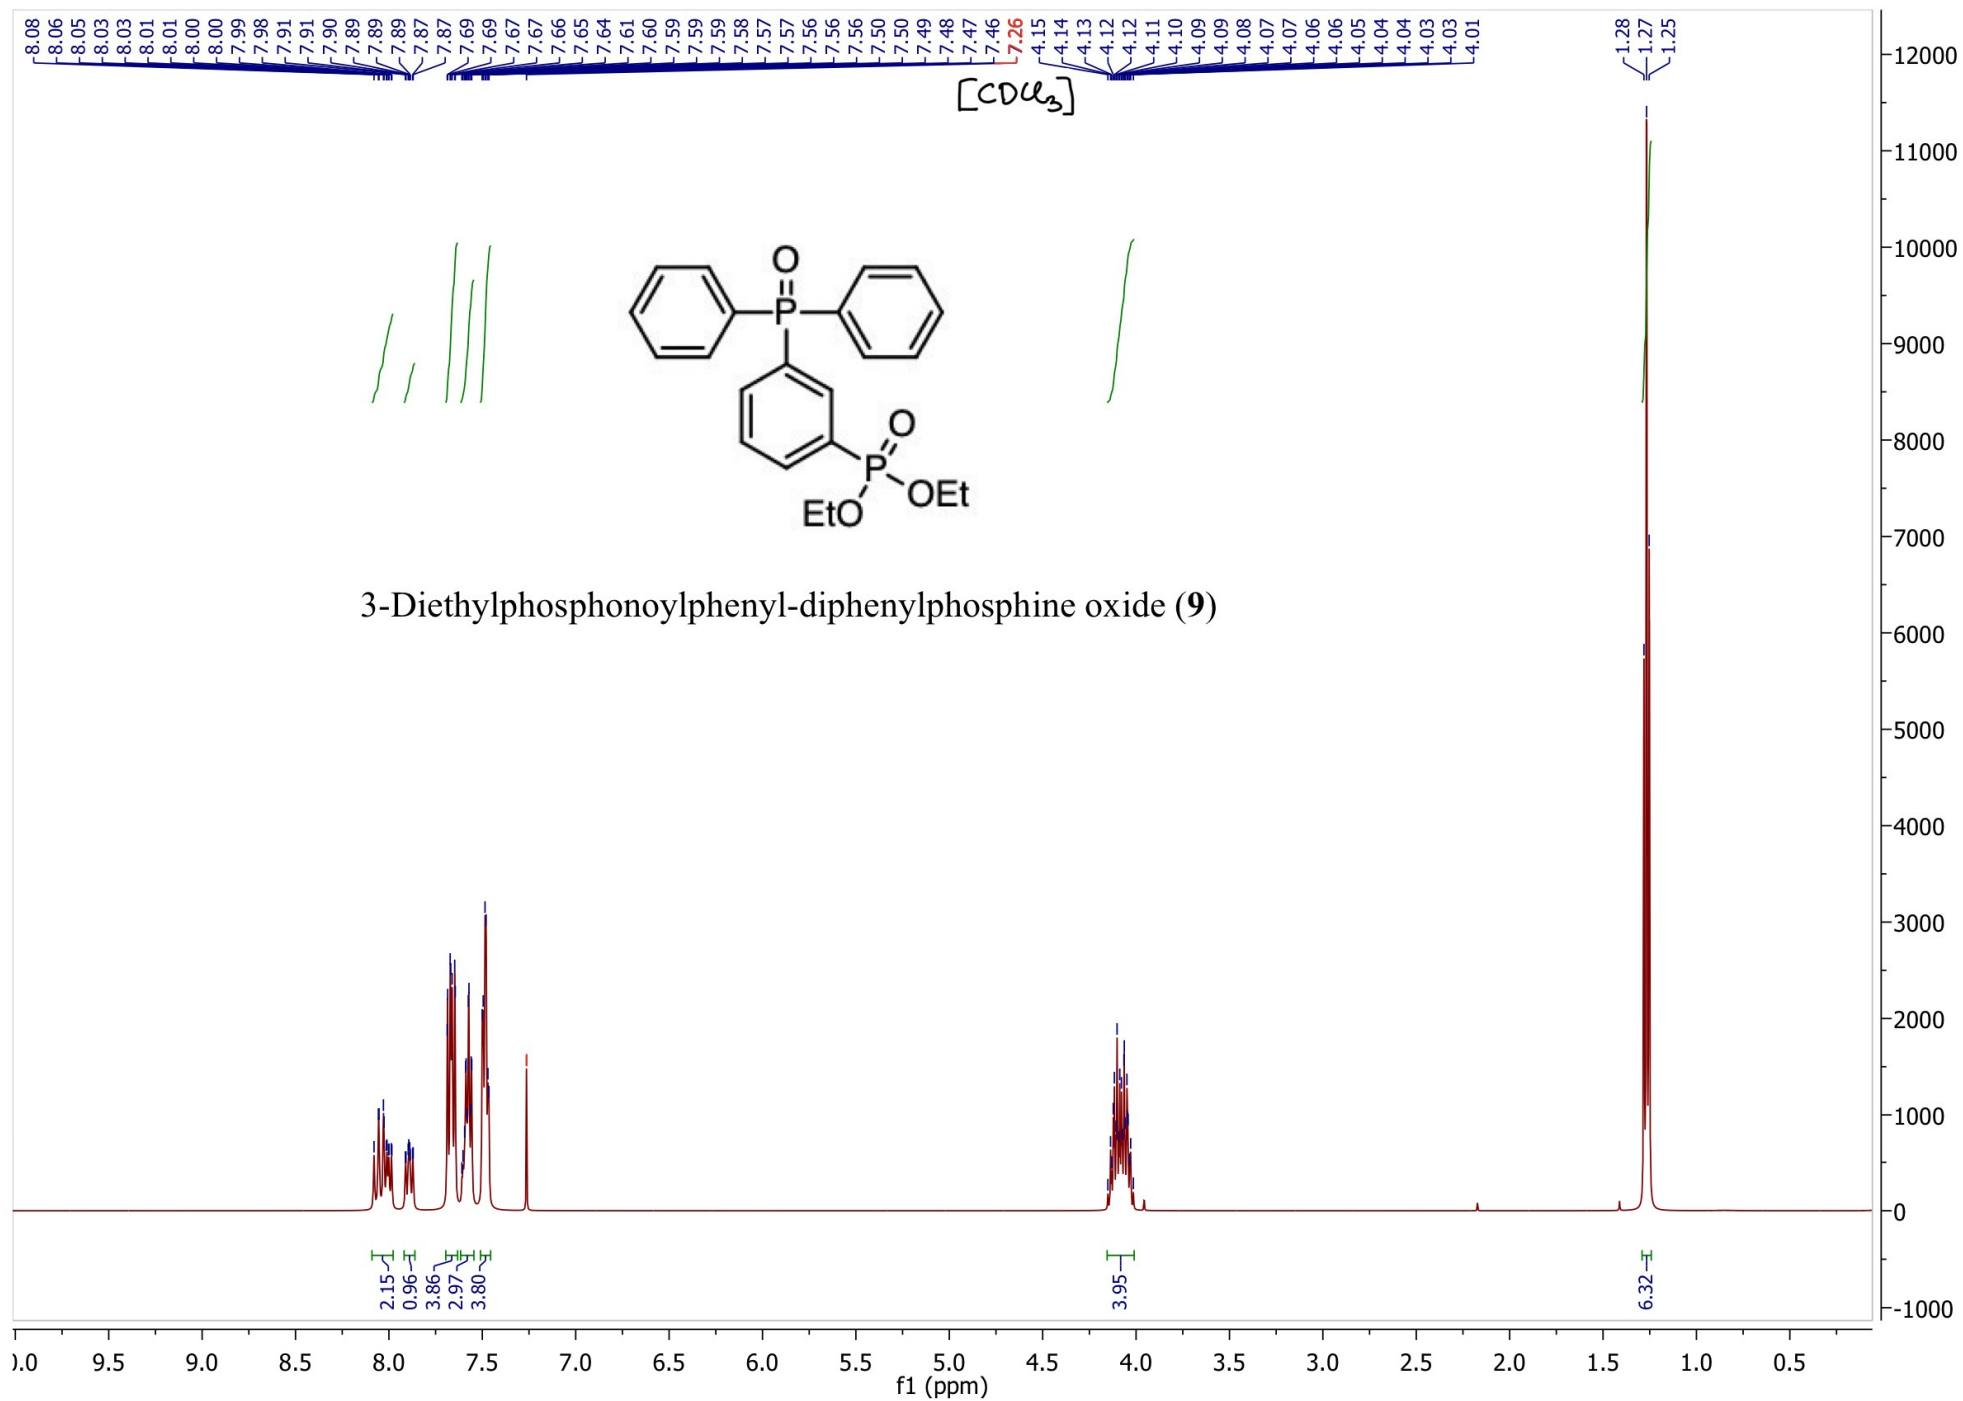

Supplement: s1 [file s1]
